# Supplementary material
Source: PubMed Central journal article supplement (PMC3308172)
Supplement: NIHMS63118-supplement-1si20050727_02.pdf [file NIHMS63118-supplement-1si20050727_02.pdf]

Nitrenium Ion Azaspirocyclization-Cyclohexadienone  
Cleavage: A New Synthetic Strategy for the  
Stereocontrolled Preparation of Highly Substituted  
Lactams and *N*-Hydroxy Lactams

*Duncan J. Wardrop\* and Matthew S. Burge*

Department of Chemistry, University of Illinois at Chicago,  
845 West Taylor Street, Chicago, IL 60607.

E-mail: wardropd@uic.edu

***Supporting Information***

## Table of Contents

|     |                                                                                                |        |
|-----|------------------------------------------------------------------------------------------------|--------|
| 1.  | General Procedures.....                                                                        | S3     |
| 2.  | Materials.....                                                                                 | S3     |
| 3.  | Instrumentation.....                                                                           | S3-4   |
| 4.  | Scheme <b>S1</b> (Preparation of Carboxylic Acids <b>35l</b> , <b>35h</b> , <b>35j</b> ) ..... | S4     |
| 5.  | Preparation of Carboxylic Acids <b>35l</b> , <b>35h</b> , <b>35j</b> .....                     | S4-7   |
| 6.  | Table <b>S1</b> (Synthesis of <i>O</i> -Alkyl Hydroxamates <b>10</b> ).....                    | S8     |
| 7.  | Synthesis of <i>O</i> -Alkyl Hydroxamates <b>10</b> .....                                      | S9-14  |
| 8.  | Synthesis of Spirodienones <b>12</b> .....                                                     | S15-20 |
| 9.  | Ozonolysis of Spirodienones <b>12</b> .....                                                    | S21-27 |
| 10. | Reductive Cleavage of <i>N</i> -Alkoxy Lactams <b>30</b> .....                                 | S27-31 |
| 11. | <sup>1</sup> H and <sup>13</sup> C NMR Spectra for Compounds <b>12a-34f</b> .....              | S32-82 |
| 12. | References.....                                                                                | S83    |

## 1. General Procedures

All non-aqueous reactions were carried out in oven- or flame-dried glassware under an atmosphere of dry argon or nitrogen, unless otherwise noted. Except as otherwise indicated, all reactions were magnetically stirred and monitored by analytical thin-layer chromatography using Merck pre-coated silica gel plates with  $F_{254}$  indicator. Visualization was accomplished by UV light and/or potassium permanganate solution. Flash column chromatography was performed according to the method of Still<sup>1</sup> using silica gel 60 (mesh 230-400) supplied by Merck. Yields refer to chromatographically and spectrographically pure compounds, unless otherwise noted.

## 2. Materials

Tetrahydrofuran (THF) was distilled from sodium-benzophenone ketyl under an atmosphere of dry argon. Methanol (MeOH) was dried from magnesium methoxide, prepared from magnesium turnings and iodine. Dichloromethane ( $\text{CH}_2\text{Cl}_2$ ) and triethylamine ( $\text{Et}_3\text{N}$ ) were distilled from calcium hydride, under an atmosphere of dry nitrogen. Phenyliodine(III) bis(trifluoroacetate) (PIFA) was prepared following the procedure reported by Loudon.<sup>2</sup> (*Z*)-4-(2,4-Dimethoxybenzylidene)-2-phenyl-4*H*-oxazol-5-one (**36**) was prepared using an adaptation of the method reported by Buck.<sup>3</sup> All other reagents and starting materials, unless otherwise noted, were purchased from commercial vendors and used without further purification.

## 3. Instrumentation

All melting points were determined in open Pyrex capillaries and are uncorrected. Infrared spectra were recorded as thin films on sodium chloride plates or in compressed discs of potassium bromide. Chemical shift values ( $\delta$ ) are reported in ppm relative to residual chloroform ( $\delta$  7.27 ppm for  $^1\text{H}$ ;  $\delta$  77.23 ppm for  $^{13}\text{C}$ ), residual water ( $\delta$  4.65 ppm for  $^1\text{H}$ ) and residual methanol ( $\delta$  4.87 ppm for  $^1\text{H}$ ;  $\delta$  49.0 ppm for  $^{13}\text{C}$ ). Multiplicities are indicated by s (singlet), d (doublet), t (triplet), q (quartet), p (pentet), h (heptet), m (multiplet), appt (apparent) and br (broad). DEPT 135 and two-dimensional (COSY, HMQC, HMBC, NOESY) NMR experiments were employed, where appropriate, to aid in the assignment of signals in the  $^1\text{H}$  NMR spectra. Optical rotations are reported as follows:  $[\alpha]_{\text{wavelength}}^{\text{temperature}}$  (*c*, solvent);  $[\alpha]_{\text{D}}$  is reported in  $10^{-1}$  deg  $\text{cm}^{-2}\text{g}^{-1}$ ; concentration (*c*) is g in per 100 ml).

#### 4. Scheme S1:<sup>a</sup> Preparation of Carboxylic Acids **35i**, **35h** and **35j**

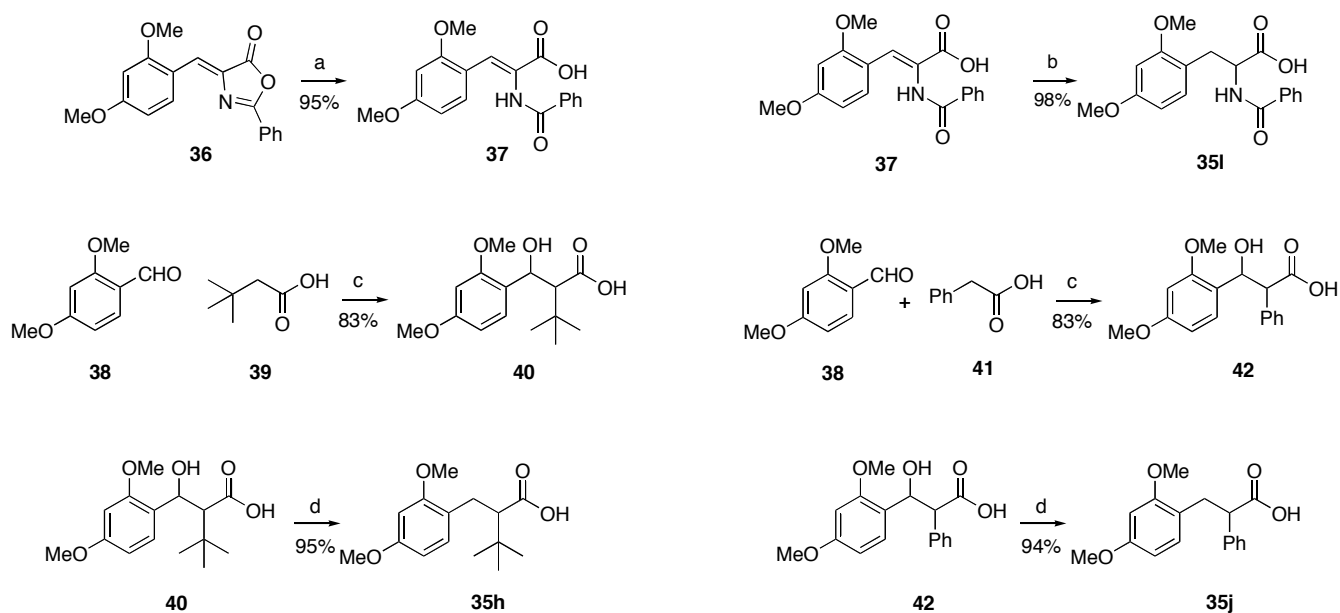

**Reagents and General Procedures.** (a) NaOH, H<sub>2</sub>O, reflux, 3h; (b) H<sub>2</sub> (50 psi), 10% Pd/C, EtOAc, MeOH, rt, 12 h; (c) **39** or **41**, LDA (2 equiv), THF, 0 °C, 1 h, then **38**, 0 °C→rt, 16 h; (d) H<sub>2</sub> (50 psi), 2 M aq. HCl, EtOAc, THF, 48 h.

#### 5. Preparation of Carboxylic Acids **35i**, **35h**, **35j**

**(Z)-2-Benzoylamino-3-(2,4-dimethoxyphenyl)acrylic acid (37).** Azalactone **36**<sup>3</sup> (2.13 g, 6.89 mmol) was heated at reflux in aqueous NaOH (0.05 M, 34 ml) for 3 h, whereupon the solution was cooled to rt and acidified with aqueous HCl (2 M, 100 ml). The reaction mixture was then extracted with EtOAc (4 x 50 ml), the combined organic extracts dried (Na<sub>2</sub>SO<sub>4</sub>), filtered and concentrated under reduced pressure. The resulting residue was recrystallized (EtOAc/hexanes) to provide **37** (2.13 g, 95%): white solid; mp 216-218 °C; *R*<sub>f</sub> 0.28 (EtOAc); FTIR (film)  $\nu_{\max}$  3254 (br), 1687, 1651, 1603, 1479, 1274, 1209, 1030, 711 cm<sup>-1</sup>; <sup>1</sup>H NMR (400 MHz, CD<sub>3</sub>OD)  $\delta$  7.90-7.88 (m, 3 H), 7.60 (d, *J* = 8.7 Hz, 1 H), 7.53 (t, *J* = 7.4 Hz, 1 H), 7.45 (t, *J* = 7.6 Hz, 2 H), 6.51 (d, *J* = 2.3 Hz, 1 H), 6.43 (dd, *J* = 2.3, 8.7 Hz, 1 H), 3.82 (s, 3 H), 3.74 (s, 3 H); <sup>13</sup>C NMR (100 MHz, CD<sub>3</sub>OD)  $\delta$  168.3, 167.3, 162.7, 159.5, 133.7, 131.7, 130.1, 129.9, 128.3, 127.3, 123.1, 115.0, 105.0, 97.7, 54.9, 54.5; HRMS-ESI calcd for C<sub>18</sub>H<sub>17</sub>NO<sub>5</sub>Na [M+Na]<sup>+</sup> 350.1004, found 350.1003.

**(±)-2-Benzoylamino-3-(2,4-dimethoxyphenyl)propionic acid (35I).** A 50 ml, glass reaction bottle, charged with 10% Pd/C (45 mg) and a solution of **37** (1.35 g, 4.13 mmol) in EtOAc and MeOH (1:1, 17 ml) was connected to a Parr type, shaker hydrogenation apparatus. The reaction vessel was flushed with N<sub>2</sub> and then placed under an atmosphere of H<sub>2</sub> (50 psi) and sealed. After shaking at rt for 12 h, the vessel was flushed with N<sub>2</sub>, the reaction mixture filtered through a plug of Celite and the filter cake washed with MeOH (3 x 10 ml). The combined filtrates were concentrated under reduced pressure and the resulting residue recrystallized (EtOAc/hexanes) to provide **35I** (1.33 g, 98%): white crystals; mp 165-167 °C; *R<sub>f</sub>* 0.29 (EtOAc); FTIR (film)  $\nu_{\max}$  3309 (br), 1708, 1651, 1533, 1508, 1289, 1209, 1119, 1032, 693 cm<sup>-1</sup>; <sup>1</sup>H NMR (500 MHz, CD<sub>3</sub>OD)  $\delta$  7.65-7.63 (m, 2 H), 7.45-7.41 (m, 1 H), 7.37-7.33 (m, 2 H), 7.04 (d, *J* = 8.3 Hz, 1 H), 6.40 (d, *J* = 2.4 Hz, 1 H), 6.34 (dd, *J* = 2.4, 8.3 Hz, 1 H), 4.68 (dd, *J* = 4.7, 9.2 Hz, 1 H), 3.69 (s, 3 H), 3.66 (s, 3 H), 3.24 (dd, *J* = 4.7, 13.7 Hz, 1 H), 2.93 (dd, *J* = 9.2, 13.7 Hz, 1 H); <sup>13</sup>C NMR (125 MHz, CD<sub>3</sub>OD)  $\delta$  177.3, 169.7, 161.6, 160.1, 135.9, 132.7 (2 C), 129.6, 128.3, 119.6, 105.6, 99.3, 56.5, 56.0, 55.8, 33.1; HRMS-ESI calcd for C<sub>18</sub>H<sub>19</sub>NO<sub>5</sub>Na [M+Na]<sup>+</sup> 352.1161, found 352.1155.

**General Procedure H (Aldol Reaction of Carboxylic Acid Dianion with Aldehyde 38).** **(±)-3-(2,4-Dimethoxyphenyl)-3-hydroxy-2-phenylpropionic Acid (42).** To a solution of LDA in THF (90 ml) (prepared from *i*-Pr<sub>2</sub>NH (11.3 ml, 80.8 mmol) and *n*-BuLi (30.9 ml, 2.5 M in hexanes, 77.3 mmol)), under an atmosphere of nitrogen at 0 °C, was added a solution of phenylacetic acid (**41**) (5.0 g, 36.7 mmol) in THF (10 ml) via syringe. After stirring for 1 h, 2,4-dimethoxybenzaldehyde (**38**) (6.41 g, 38.6 mmol) in THF (10 ml) was added via syringe and the solution then allowed to warm to rt. After stirring for 16 h, the reaction was quenched with aqueous HCl (3 M, 20 ml) and the volatiles removed under reduced pressure. The aqueous concentrate was extracted with CH<sub>2</sub>Cl<sub>2</sub> (4 x 40 ml) and the combined organic extracts dried (Na<sub>2</sub>SO<sub>4</sub>), filtered and concentrated under reduced pressure. The resulting colorless residue was recrystallized (EtOAc/hexanes) to provide **42** (9.25 g, 83%) as a mixture (18:1) of diastereomers: yellow solid; mp 113-115 °C; *R<sub>f</sub>* 0.74 (EtOAc); FTIR (film)  $\nu_{\max}$  3454 (br), 1709, 1508, 1293, 1209, 1158, 1035, 731 cm<sup>-1</sup>; <sup>1</sup>H NMR (400 MHz, CDCl<sub>3</sub>)  $\delta$  7.18-7.16 (m, 5 H), 6.92 (d, *J* = 8.4 Hz, 1 H), 6.32 (d, *J* = 2.2 Hz, 1 H), 6.28 (dd, *J* = 2.2, 8.4 Hz, 1 H), 5.31 (d, *J* = 9.3 Hz, 1 H), 4.16 (d, *J* = 9.3 Hz, 1 H), 3.71 (s, 6 H); <sup>13</sup>C NMR (100 MHz, CDCl<sub>3</sub>)  $\delta$  175.4, 160.3, 157.7, 135.4, 129.3, 128.5, 128.3, 127.4, 120.8, 104.1, 98.5, 73.6, 58.2, 55.2 (2 C); HRMS-ESI calcd for C<sub>17</sub>H<sub>18</sub>O<sub>5</sub>Na [M+Na]<sup>+</sup> 325.1052, found 325.1048.

**(±)-2-[(2,4-Dimethoxyphenyl)-hydroxymethyl]-3,3-dimethylbutyric acid (40).** Following general procedure H, reaction of 2,4-dimethoxybenzaldehyde (**38**) (4.51 g, 27.1 mmol) with the lithium dianion derived from *tert*-butylacetic acid (**39**) (3.00 g, 25.8 mmol) provided a colorless oil, which was recrystallized (EtOAc/hexanes) to provide **40** (6.02 g, 83%) as a single diastereomer: white solid; mp 150–154 °C;  $R_f$  0.44 (EtOAc/hexanes, 1:1); FTIR (film)  $\nu_{\max}$  3319 (br), 1680, 1616, 1504, 1461, 1209, 1032, 852  $\text{cm}^{-1}$ ;  $^1\text{H}$  NMR (400 MHz,  $\text{CD}_3\text{OD}$ )  $\delta$  7.24 (d,  $J = 9.1$  Hz, 1 H), 6.51–6.49 (m, 2 H), 5.26 (d,  $J = 5.7$  Hz, 1 H), 3.82 (s, 3 H), 3.77 (s, 3 H), 2.70 (d,  $J = 5.7$  Hz, 1 H), 1.00 (s, 9 H);  $^{13}\text{C}$  NMR (100 MHz,  $\text{CD}_3\text{OD}$ )  $\delta$  176.6, 160.5, 157.0, 127.7, 124.0, 104.1, 97.8, 66.9, 60.1, 54.3 (2 C), 32.1, 27.9; HRMS-ESI calcd for  $\text{C}_{15}\text{H}_{22}\text{O}_5\text{Na}$   $[\text{M}+\text{Na}]^+$  305.1365, found 305.1366.

**General Procedure I (Hydrogenolysis of Aldol Products).** **(±)-3-(2,4-Dimethoxyphenyl)-2-phenylpropionic acid (35j).** A 500 ml, glass reaction bottle, charged with 10% Pd/C (72 mg), aqueous HCl (2 M, 5 ml) and a solution of **42** (2.04 g, 6.76 mmol) in EtOAc and MeOH (10:1, 68 ml) was connected to a Parr Shaker hydrogenation apparatus. The reaction vessel was flushed with  $\text{N}_2$  and then placed under an atmosphere of  $\text{H}_2$  (50 psi) and sealed. After shaking at rt for 48 h, the vessel was flushed with  $\text{N}_2$  and the reaction mixture filtered through a plug of Celite and the filter cake washed with MeOH (3 x 20 ml). The combined filtrates were concentrated under reduced pressure and the resulting residue recrystallized (EtOAc/hexanes) to provide **35j** (1.81 g, 94%): white crystals; mp 119–124 °C;  $R_f$  0.39 (EtOAc/hexanes, 1:1); FTIR (film)  $\nu_{\max}$  3026 (br), 1704, 1506, 1459, 1290, 1208, 1037  $\text{cm}^{-1}$ ;  $^1\text{H}$  NMR (500 MHz,  $\text{CDCl}_3$ )  $\delta$  7.33–7.25 (m, 5 H), 6.90 (d,  $J = 8.3$  Hz, 1 H), 6.42 (d,  $J = 2.4$  Hz, 1 H), 6.31 (dd,  $J = 2.4, 8.3$  Hz, 1 H), 3.95 (dd,  $J = 6.6, 8.5$  Hz, 1 H), 3.77 (s, 6 H), 3.31 (dd,  $J = 8.5, 13.7$  Hz, 1 H), 2.99 (dd,  $J = 6.6, 13.7$  Hz, 1 H);  $^{13}\text{C}$  NMR (125 MHz,  $\text{CDCl}_3$ )  $\delta$  179.8, 159.6, 158.4, 138.7, 131.1, 128.5, 128.1, 127.3, 119.4, 103.7, 98.3, 55.3, 55.2, 51.4, 33.9; HRMS-ESI calcd for  $\text{C}_{17}\text{H}_{19}\text{O}_4$   $[\text{M}+\text{H}]^+$  287.1283, found 287.1295.

**(±)-2-(2,4-Dimethoxybenzyl)-3,3-dimethylbutyric acid (35h).** Following general procedure I, acid-catalyzed hydrogenolysis of **40** (3.04 g, 10.77 mmol) gave a colorless oil, which was recrystallized (EtOAc/hexanes) to afford **35h** (2.72 g, 95%): white crystals; mp 119–120 °C;  $R_f$  0.70 (EtOAc/hexanes, 1:1); FTIR (film)  $\nu_{\max}$  3083 (br), 1702, 1614, 1507, 1465, 1289, 1209, 1156, 1039  $\text{cm}^{-1}$ ;  $^1\text{H}$  NMR (400 MHz,  $\text{CDCl}_3$ )  $\delta$  7.00 (d,  $J = 8.2$  Hz, 1 H), 6.43 (d,  $J = 2.1$  Hz, 1 H), 6.35 (dd,  $J = 2.1, 8.2$  Hz, 1 H), 3.79 (s, 3 H,  $\text{OCH}_3$ ), 3.77 (s, 3 H), 2.94 (dd,  $J = 2.1, 13.1$  Hz, 1 H), 2.70 (t,  $J = 12.5$  Hz, 1 H), 2.59 (dd,  $J = 2.1,$

11.5 Hz, 1 H);  $^{13}\text{C}$  NMR (100 MHz,  $\text{CDCl}_3$ )  $\delta$  181.6, 159.5, 158.3, 130.4, 120.7, 103.7, 98.4, 56.4, 55.2, 55.1, 33.0, 28.3, 27.7; HRMS-ESI calcd for  $\text{C}_{15}\text{H}_{22}\text{NaO}_4$   $[\text{M}+\text{Na}]^+$  289.1416, found 289.1424. Anal Calcd for  $\text{C}_{15}\text{H}_{22}\text{O}_4$ ; C, 67.64; H, 8.33. Found: C, 67.87; H 8.61.

## 6. Table S1: Synthesis of *O*-Alkyl Hydroxamates **10**.

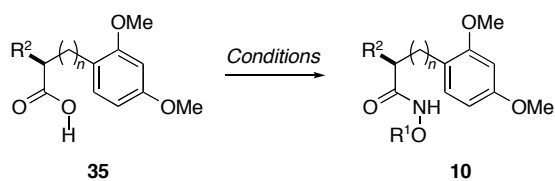

| entry | substrate      | <i>n</i> | R <sup>1</sup> | R <sup>2</sup> | method <sup>a</sup> | yield (%) <sup>b</sup> |
|-------|----------------|----------|----------------|----------------|---------------------|------------------------|
| 1     | <b>35a</b>     | 0        | Me             | H              | A                   | <b>10a</b> 93          |
| 2     | <b>35b</b>     | 0        | Bn             | H              | B                   | <b>10b</b> 95          |
| 3     | <b>35c</b>     | 1        | Me             | H              | A                   | <b>10c</b> 95          |
| 4     | <b>35d</b>     | 1        | Bn             | H              | B                   | <b>10d</b> 97          |
| 5     | <b>35e</b>     | 2        | Me             | H              | A                   | <b>10e</b> 92          |
| 6     | <b>35f</b>     | 2        | Bn             | H              | B                   | <b>10f</b> 88          |
| 7     | <b>35g</b>     | 1        | Me             | Me             | A                   | <b>10g</b> 100         |
| 8     | <b>35h</b>     | 1        | Me             | <i>t</i> -Bu   | A                   | <b>10h</b> 85          |
| 9     | <b>35i</b>     | 1        | Me             | Bn             | A                   | <b>10i</b> 85          |
| 10    | <b>35j</b>     | 1        | Me             | Ph             | A                   | <b>10j</b> 85          |
| 11    | <b>35k</b>     | 1        | Me             | OTIPS          | C                   | <b>10k</b> 88          |
| 12    | <b>35l</b>     | 1        | Me             | NHBz           | A                   | <b>10l</b> 89          |
| 13    | <br><b>35m</b> | -        | -              | -              | A                   | <br><b>10m</b> 97      |
| 14    | <br><b>35n</b> | -        | -              | -              | A                   | <br><b>10n</b> 99      |

<sup>a</sup> Method A: MeONH<sub>2</sub>•HCl, EDC, Et<sub>3</sub>N, CH<sub>2</sub>Cl<sub>2</sub>, rt. Method B: BnONH<sub>2</sub>•HCl, EDC, Et<sub>3</sub>N, CH<sub>2</sub>Cl<sub>2</sub>, rt. Method C: *i*-BuOCOC<sub>2</sub>H<sub>5</sub>, Et<sub>3</sub>N, CH<sub>2</sub>Cl<sub>2</sub>, then MeONH<sub>2</sub>•HCl. <sup>b</sup> Isolated yield, after purification by flash chromatography.



## 7. Synthesis of *O*-Alkyl Hydroxamates 10

**Coupling Method A (Preparation of *O*-Methyl Hydroxamates via EDC Coupling).** ***O*-Methyl 2-(2,4-dimethoxyphenyl)acetohydroxamate (10a) (Entry 1, Table S1).** To a stirred solution of **35a** (2.00 g, 10.19 mmol) and Et<sub>3</sub>N (1.05 ml, 7.77 mmol) in CH<sub>2</sub>Cl<sub>2</sub> (20 ml) was added EDC (2.15 g, 11.21 mmol) and H<sub>2</sub>NOMe•HCl (979 mg, 11.72 mmol). After stirring for 9 h, the reaction mixture was quenched with aqueous HCl (2 M, 40 ml) and the organic phase separated. The aqueous phase was extracted with CH<sub>2</sub>Cl<sub>2</sub> (3 x 15 ml) and the combined organic extracts dried (Na<sub>2</sub>SO<sub>4</sub>), filtered and concentrated under reduced pressure. The resulting residue was purified by flash chromatography (SiO<sub>2</sub>, EtOAc) to provide **10a** (2.13 g, 93%): colorless crystals; mp 94-97 °C (EtOAc/hexanes); *R*<sub>f</sub> 0.43 (EtOAc); FTIR (film)  $\nu_{\max}$  3172, 1678, 1650, 1614, 1508, 1293, 1207, 1038 cm<sup>-1</sup>; <sup>1</sup>H NMR (500 MHz, CDCl<sub>3</sub>)  $\delta$  8.64 (br s, 1 H, NH), 7.11 (d, *J* = 8.2 Hz, 2 H), 6.45-6.43 (m, 3 H), 3.81 (s, 3 H), 3.78 (s, 3 H), 3.69 (s, 3 H), 3.40 (br s, 2 H); <sup>13</sup>C NMR (125 MHz, CDCl<sub>3</sub>)  $\delta$  169.9 (C-1), 160.9, 158.3, 131.9, 115.2, 105.1, 99.2, 64.7, 55.9, 55.8, 35.8 (C-2); HRMS-ESI calcd for C<sub>11</sub>H<sub>15</sub>NO<sub>4</sub>Na [M+Na]<sup>+</sup> 248.0899, found 248.0910. Anal Calcd for C<sub>11</sub>H<sub>15</sub>NO<sub>4</sub>; C, 58.66; H, 6.71; N, 6.22. Found: C, 58.65; H 6.53; N, 6.31.

***O*-Methyl 3-(2,4-dimethoxyphenyl)propiohydroxamate (10c) (Entry 3, Table S1).** Following Coupling Method A, **35c** (4.00 g, 19.04 mmol) was coupled with MeONH<sub>2</sub>•HCl to provide **10c** (4.35 g, 95%), after purification by flash chromatography (SiO<sub>2</sub>, EtOAc): white crystals; mp 64-66 °C (EtOAc/hexanes); *R*<sub>f</sub> 0.46 (EtOAc); FTIR (film)  $\nu_{\max}$  3188 (br), 1662, 1614, 1507, 1206, 1155, 1037 cm<sup>-1</sup>; <sup>1</sup>H NMR (400 MHz, CD<sub>3</sub>OD)  $\delta$  6.97 (d, *J* = 8.2 Hz, 1 H), 6.46 (d, *J* = 2.2 Hz, 1 H), 6.38 (dd, *J* = 2.2, 8.2 Hz, 1 H), 3.77 (s, 3 H), 3.72 (s, 3 H), 3.56 (s, 3 H), 2.80 (t, *J* = 7.5 Hz, 2 H), 2.25 (t, *J* = 7.5 Hz, 2 H); <sup>13</sup>C NMR (100 MHz, CD<sub>3</sub>OD)  $\delta$  173.2, 162.3, 160.7, 132.3, 122.8, 106.1, 100.2, 65.2, 56.7 (2 C), 35.2, 28.0; HRMS-ESI calcd for C<sub>12</sub>H<sub>17</sub>NO<sub>4</sub>Na [M+Na]<sup>+</sup> 262.1055, found 262.1053.

***O*-Methyl 4-(2,4-dimethoxyphenyl)butyrohydroxamate (10e) (Entry 5, Table S1).** Following Coupling Method A, **34e** (2.00 g, 7.87 mmol) was coupled with MeONH<sub>2</sub>•HCl to provide **10e** (2.05 g, 92%), after purification by flash chromatography (SiO<sub>2</sub>, EtOAc): white crystals; mp 64-66 °C (EtOAc/hexanes); *R*<sub>f</sub> 0.51 (EtOAc); FTIR (film)  $\nu_{\max}$  3172 (br), 1655, 1614, 1506, 1288, 1206, 1153, 1037 cm<sup>-1</sup>; <sup>1</sup>H NMR (400 MHz, CD<sub>3</sub>OD)  $\delta$  6.96 (d, *J* = 8.2 Hz, 1 H), 6.46 (d, *J* = 2.3 Hz, 1 H), 6.40 (dd, *J* = 2.3, 8.2 Hz, 1 H), 3.75 (s, 3 H), 3.73 (s, 3 H), 3.64 (s, 3 H), 2.53 (t, *J* = 7.4 Hz, 2 H), 2.02 (t, *J* = 7.4 Hz, 2

H), 1.84-1.76 (m, 2 H);  $^{13}\text{C}$  NMR (100 MHz,  $\text{CD}_3\text{OD}$ )  $\delta$  171.3, 159.5, 158.3, 129.8, 121.5, 103.8, 97.8, 62.9, 54.3 (2 C), 32.0, 28.6, 25.7; HRMS-ESI calcd for  $\text{C}_{13}\text{H}_{19}\text{NO}_4\text{Na}$   $[\text{M}+\text{Na}]^+$  276.1212, found 276.1210.

***O*-Methyl ( $\pm$ )-3-(2,4-dimethoxyphenyl)-2-methylpropiohydroxamate (10g) (Entry 7, Table S1).** Following Coupling Method A, **34g** (1.92 g, 8.56 mmol) was coupled with  $\text{MeONH}_2\cdot\text{HCl}$  to provide **10g** (2.16 g, 100%), after flash chromatography ( $\text{SiO}_2$ , EtOAc/hexanes, 1:1): white crystals; mp 69-72 °C (EtOAc/hexanes);  $R_f$  0.20 (EtOAc/hexanes, 1:1); FTIR (film)  $\nu_{\text{max}}$  3201 (br), 1658, 1508, 1208, 1158, 1039, 832  $\text{cm}^{-1}$ ;  $^1\text{H}$  NMR (500 MHz,  $\text{CDCl}_3$ )  $\delta$  8.38 (br s, 1 H), 7.00 (d,  $J = 8.2$  Hz, 1 H), 6.42-6.36 (m, 2 H), 3.78 (s, 3 H), 3.76 (s, 3 H), 3.58 (s, 3 H), 2.80-2.72 (m, 1 H), 2.68 (dd,  $J = 6.3, 13.3$  Hz, 1 H), 2.39-2.32 (m, 1 H), 1.15 (d,  $J = 6.3$  Hz, 3 H);  $^{13}\text{C}$  NMR (125 MHz,  $\text{CDCl}_3$ )  $\delta$  174.5, 160.0, 158.6, 131.8, 120.4, 104.2, 98.9, 64.6, 55.74, 55.67, 38.7, 34.8, 17.6; HRMS-CI calcd for  $\text{C}_{13}\text{H}_{20}\text{NO}_4$   $[\text{M}+\text{H}]^+$  254.1387, found 254.1369. Anal. Calcd for  $\text{C}_{13}\text{H}_{19}\text{NO}_4$ ; C, 61.64; H, 7.56; N, 5.53. Found: C, 61.33; H, 7.41; N, 5.53.

***O*-Methyl ( $\pm$ )-2-(2,4-dimethoxybenzyl)-3,3-dimethylbutyriohydroxamate (10h) (Entry 8, Table S1).** Following Coupling Method A, **35h** (457 mg, 1.72 mmol) was coupled with  $\text{MeONH}_2\cdot\text{HCl}$  to provide **10h** (438 mg, 85%), after purification by flash chromatography ( $\text{SiO}_2$ , EtOAc): white crystals; mp 138-140 °C (EtOAc/hexanes);  $R_f$  0.30 (EtOAc/hexanes, 1:1); FTIR (film)  $\nu_{\text{max}}$  3168 (br), 1651, 1506, 1463, 1288, 1209, 1155, 1041  $\text{cm}^{-1}$ ;  $^1\text{H}$  NMR (500 MHz,  $\text{CDCl}_3$ )  $\delta$  7.76 (br s, 1 H, NH), 7.02 (d,  $J = 8.2$  Hz, 1 H), 6.41 (d,  $J = 2.4$  Hz, 1 H), 6.35 (dd,  $J = 2.4, 8.2$  Hz, 1 H), 3.79 (s, 3 H), 3.76 (s, 3 H), 3.50 (s, 3 H), 2.95 (appt d,  $J = 12.9$  Hz, 1 H), 2.72 (appt t,  $J = 12.3$  Hz, 1 H), 1.87 (appt d,  $J = 10.7$  Hz, 1 H), 1.07 (s, 9 H);  $^{13}\text{C}$  NMR (100 MHz,  $\text{CDCl}_3$ )  $\delta$  172.4, 159.5, 158.1, 131.3, 120.7, 103.7, 98.5, 64.1, 55.3, 55.2, 54.3, 33.3, 28.1, 27.8; HRMS-ESI calcd for  $\text{C}_{16}\text{H}_{25}\text{NO}_4\text{Na}$   $[\text{M}+\text{Na}]^+$  318.1681, found 318.1667.

***O*-Methyl ( $\pm$ )-2-(2,4-dimethoxybenzyl)-2-benzylpropiohydroxamate (10i) (Entry 9, Table S1).** Following Coupling Method A, **35i** (362 mg, 1.21 mmol) was coupled with  $\text{MeONH}_2\cdot\text{HCl}$  to provide **10i** (338 mg, 85%), after purification by flash chromatography ( $\text{SiO}_2$ , EtOAc/hexanes, 1:1): colorless oil;  $R_f$  0.60 (EtOAc); FTIR (film)  $\nu_{\text{max}}$  3159 (br), 1673, 1613, 1587, 1505, 1459, 1288, 1206, 1160, 1037  $\text{cm}^{-1}$ ;  $^1\text{H}$  NMR (400MHz,  $\text{CDCl}_3$ )  $\delta$  7.26-7.22 (m, 2 H), 7.18-7.15 (m, 3 H), 7.02 (d,  $J = 8.2$  Hz, 1 H), 6.41 (d,  $J = 2.1$  Hz, 1 H), 6.32 (dd,  $J = 2.1, 8.2$  Hz, 1 H), 3.77 (s, 3 H), 3.75 (s, 3 H), 3.36 (s, 3 H), 3.00 (dd,  $J = 10.1,$

13.3 Hz), 2.88-2.81 (m, 2 H), 2.76 (dd,  $J = 5.0, 13.3$  Hz, 1 H), 2.52-2.43 (m, 1 H);  $^{13}\text{C}$  NMR (100 MHz,  $\text{CDCl}_3$ )  $\delta$  172.2, 159.7, 158.2, 139.6, 131.4, 129.0 (2 C), 128.4 (2 C), 126.3, 119.7, 103.8, 98.5, 64.0, 55.3 (2 C), 46.7, 38.4, 33.1; HRMS-ESI calcd for  $\text{C}_{19}\text{H}_{24}\text{NO}_4$   $[\text{M}+\text{H}]^+$  330.1705, found 330.1714.

***O*-Methyl ( $\pm$ )-3-(2,4-dimethoxyphenyl)-2-phenylpropiohydroxamate (10j) (Entry 10, Table S1).** Following Coupling Method A, **35j** (1.43 g, 4.99 mmol) was coupled with  $\text{MeONH}_2\cdot\text{HCl}$  to provide **10j** (1.34 g, 85%), after purification by flash chromatography ( $\text{SiO}_2$ , EtOAc): white crystals; mp 134-135 °C (EtOAc/hexanes);  $R_f$  0.39 (EtOAc/hexanes, 1:1); FTIR (film)  $\nu_{\text{max}}$  3172 (br), 1655, 1614, 1505, 1458, 1288, 1207, 1155, 1036  $\text{cm}^{-1}$ ;  $^1\text{H}$  NMR (400 MHz,  $\text{CD}_3\text{OD}$ )  $\delta$  7.32-7.12 (m, 5 H), 6.89 (d,  $J = 8.2$  Hz, 1 H), 6.44 (d,  $J = 2.4$  Hz, 1 H), 6.30 (dd,  $J = 2.4, 8.2$  Hz, 1 H), 3.77 (s, 3 H,  $\text{OCH}_3$ ), 3.70 (s, 3 H,  $\text{OCH}_3$ ), 3.55 (dd,  $J = 5.7, 9.5$  Hz, 1 H), 3.42 (s, 3 H,  $\text{OCH}_3$ ), 3.13 (dd,  $J = 9.5, 13.2$  Hz, 1 H), 2.95 (dd,  $J = 5.7, 13.2$  Hz, 1 H);  $^{13}\text{C}$  NMR (100 MHz,  $\text{CD}_3\text{OD}$ )  $\delta$  171.1, 159.9, 158.4, 139.7, 130.8, 128.0, 127.4, 126.7, 119.1, 103.5, 97.8, 62.7, 54.3 (2 C), 49.0, 33.4; HRMS-ESI calcd for  $\text{C}_{18}\text{H}_{21}\text{NO}_4\text{Na}$   $[\text{M}+\text{Na}]^+$  338.1368, found 338.1367.

**( $\pm$ )-*N*-[2-(2,4-Dimethoxyphenyl)-1-methoxycarbamoyl]ethyl-benzamide (10l) (Entry 12, Table S1).** Following Coupling Method A, **35l** (1.57 g, 4.77 mmol) was coupled with  $\text{MeONH}_2\cdot\text{HCl}$  to provide **10l** (1.52 g, 89%), after purification by flash chromatography ( $\text{SiO}_2$ , EtOAc): yellow crystals; mp 172-176 °C (EtOAc/hexanes);  $R_f$  0.39 (EtOAc/hexanes, 1:1); FTIR (film)  $\nu_{\text{max}}$  3218 (br), 1677, 1641, 1537, 1511, 1459, 1292, 1209, 1157, 1038  $\text{cm}^{-1}$ ;  $^1\text{H}$  NMR (400 MHz,  $\text{CDCl}_3$ )  $\delta$  9.72 (br s, 1 H, NH), 7.68 (d,  $J = 7.6$  Hz, 2 H), 7.51 (t,  $J = 7.4$  Hz, 1 H), 7.41 (t,  $J = 7.6$  Hz, 2 H), 7.31 (d,  $J = 6.0$  Hz, 1 H, NH), 7.11 (d,  $J = 8.9$  Hz, 1 H), 6.41 (m, 2 H), 4.67-4.65 (m, 1 H), 3.80 (s, 3 H), 3.76 (s, 3 H), 3.69 (s, 3 H), 3.29 (dd,  $J = 9.1, 13.8$  Hz, 1 H), 3.03 (dd,  $J = 5.9, 13.8$  Hz, 1 H);  $^{13}\text{C}$  NMR (100 MHz,  $\text{CDCl}_3$ )  $\delta$  168.9, 167.8, 160.1, 158.3, 133.4, 131.9, 131.8, 128.6, 127.0, 117.2, 104.6, 98.7, 64.2, 55.5, 55.3, 52.7, 31.2; HRMS-ESI calcd for  $\text{C}_{19}\text{H}_{22}\text{N}_2\text{O}_5\text{Na}$   $[\text{M}+\text{Na}]^+$  381.1426, found 381.1428.

***O*-Methyl ( $\pm$ )-3-(2,4-dimethoxyphenyl)-3-methylpropiohydroxamate (10m) (Entry 13, Table S1).** Following Coupling Method A, **35m** (383 mg, 1.71 mmol) was coupled with  $\text{MeONH}_2\cdot\text{HCl}$  to provide **10m** (430 mg, 99%), after purification by flash chromatography ( $\text{SiO}_2$ , EtOAc/hexanes, 1:1): white crystals; mp 110-112 °C (EtOAc/hexanes);  $R_f$  0.15 (EtOAc/hexanes, 1:1); FTIR (film)  $\nu_{\text{max}}$  3181 (br), 1666, 1506, 1208, 1040  $\text{cm}^{-1}$ ;  $^1\text{H}$  NMR (400 MHz,  $\text{CDCl}_3$ )  $\delta$  8.64 (br s, 1 H, NH), 7.04 (d,  $J = 8.0$  Hz, 1 H), 6.43-6.41 (m, 2 H), 3.79 (s, 3 H), 3.77 (s, 3 H), 3.61 (s, 3 H), 3.54-3.52 (m, 1 H), 2.47-2.42 (m, 1 H),

2.30-2.25( m, 1 H), 1.25 (d,  $J = 7.0$  Hz, 3 H);  $^{13}\text{C}$  NMR (100 MHz,  $\text{CDCl}_3$ )  $\delta$  170.1, 159.3, 157.8, 127.7, 125.7, 104.2, 98.7, 64.1, 55.3 (2 C), 40.7, 30.2, 20.2; HRMS-ESI calcd for  $\text{C}_{13}\text{H}_{20}\text{NO}_4$   $[\text{M}+\text{H}]^+$  253.13086, found 253.13078.

***O*-Methyl 2-(2,4-dimethoxybenzyl)benzohydroxamate (10n) (Entry 14, Table S1).** Following Coupling Method A, **35n** (1.09 g, 4.00 mmol) was coupled with  $\text{MeONH}_2\cdot\text{HCl}$  to provide **10n** (1.17 g, 97%), after purification by flash chromatography ( $\text{SiO}_2$ , EtOAc/hexanes, 1:5): white powder; mp 144-145 °C (EtOAc/hexanes);  $R_f$  0.68 (EtOAc); FTIR (film)  $\nu_{\text{max}}$  3179 (br), 1653, 1613, 1506, 1291, 1208, 1157, 1036, 735  $\text{cm}^{-1}$ ;  $^1\text{H}$  NMR (500 MHz,  $\text{CDCl}_3$ )  $\delta$  8.98 (br s, 1 H, NH), 7.40 (d,  $J = 7.5$  Hz, 1 H), 7.31 (t,  $J = 7.7$  Hz, 1 H), 7.22-7.15 (m, 2 H), 7.00 (d,  $J = 8.1$  Hz, 1 H), 6.44-6.42 (m, 2 H), 4.04 (s, 2 H), 3.82 (s, 3 H,  $\text{OCH}_3$ ), 3.78 (s, 3 H,  $\text{OCH}_3$ ), 3.75 (s, 3 H,  $\text{OCH}_3$ );  $^{13}\text{C}$  NMR (125 MHz,  $\text{CDCl}_3$ )  $\delta$  168.0, 159.7, 158.0, 139.3, 132.7, 131.0, 130.5, 130.4, 127.9, 126.0 (2 C), 121.3, 104.1, 98.8, 64.4, 55.4, 32.5; HRMS-ESI calcd for  $\text{C}_{17}\text{H}_{19}\text{NO}_4\text{Na}$   $[\text{M}+\text{Na}]^+$  324.1212, found 324.1221.

**Coupling Method B (Preparation of *O*-Benzyl Hydroxamates via EDC Coupling). *O*-Benzyl 2-(2,4-dimethoxyphenyl)acetohydroxamate (10b) (Entry 2, Table S1).** To a stirred solution of **35b** (2.00 g, 10.19 mmol) and  $\text{Et}_3\text{N}$  (1.50 ml, 10.70 mmol) in  $\text{CH}_2\text{Cl}_2$  (20 ml) was added, EDC $\cdot\text{HCl}$  (2.15 g, 11.21 mmol) and  $\text{BnONH}_2\cdot\text{HCl}$  (1.87 g, 11.72 mmol). After stirring for 16 h, the reaction was quenched with aqueous HCl (2 M, 40 ml) and the organic phase separated. The aqueous phase was extracted with  $\text{CH}_2\text{Cl}_2$  (3 x 20 ml) and the combined organic extracts dried ( $\text{MgSO}_4$ ), filtered and concentrated under reduced pressure. The resulting residue was purified by flash chromatography ( $\text{SiO}_2$ , EtOAc) to provide **10b** (2.91 g, 95%): white solid; mp 92-94 °C (EtOAc/hexanes)  $R_f$  0.60 (EtOAc); FTIR (film)  $\nu_{\text{max}}$  3195 (br), 1662, 1614, 1587, 1507, 1208, 1044  $\text{cm}^{-1}$ ;  $^1\text{H}$  NMR (400 MHz,  $\text{CDCl}_3$ )  $\delta$  8.31 (br s, 1 H, NH), 7.33-7.26 (m, 5 H), 7.12 (d,  $J = 8.2$  Hz, 1 H), 6.48 (d,  $J = 8.2$  Hz, 1 H), 6.37 (s, 1H), 4.83 (s, 2 H), 3.80 (s, 3 H), 3.62 (s, 3 H), 3.39 (br s, 2 H);  $^{13}\text{C}$  NMR (100 MHz,  $\text{CDCl}_3$ )  $\delta$  169.2, 160.4, 157.5, 135.3, 131.5 (2 C), 129.2, 128.5, 114.8, 104.6, 98.8, 55.4, 55.3, 77.8, 35.6; HRMS-ESI calcd for  $\text{C}_{17}\text{H}_{19}\text{NO}_4\text{Na}$   $[\text{M}+\text{Na}]^+$  324.1212, found 324.1217.

***O*-Benzyl 3-(2,4-dimethoxyphenyl)propiohydroxamate (10d) (Entry 4, Table S1).** Following Coupling Method B, **35d** (936 mg, 4.45 mmol) was coupled with  $\text{BnONH}_2\cdot\text{HCl}$  to provide **10d** (1.36 g, 97%), after purification by flash chromatography ( $\text{SiO}_2$ , EtOAc): white crystals; mp 77-79 °C (EtOAc/hexanes);  $R_f$  0.68 (EtOAc); FTIR (film)  $\nu_{\text{max}}$  3187 (br), 1654, 1614, 1505, 1206, 1038  $\text{cm}^{-1}$ ;  $^1\text{H}$

NMR (400 MHz, CD<sub>3</sub>OD)  $\delta$  7.35-7.22 (m, 5 H), 6.98 (d,  $J$  = 8.2 Hz, 1 H), 6.47 (d,  $J$  = 2.3 Hz, 1 H), 6.39 (dd,  $J$  = 2.3, 8.2 Hz, 1 H), 4.67 (s, 2 H), 3.75 (s, 3 H), 3.73 (s, 3 H), 2.79 (t,  $J$  = 7.4 Hz, 2 H), 2.23 (t,  $J$  = 7.4 Hz, 2 H); <sup>13</sup>C NMR (100 MHz, CD<sub>3</sub>OD)  $\delta$  171.0, 159.9, 158.3, 135.5, 130.1, 129.0, 128.1, 128.0, 120.4, 103.7, 97.9, 77.6, 54.3 (2 C), 32.7, 25.6; HRMS-ESI calcd for C<sub>18</sub>H<sub>22</sub>NO<sub>4</sub> [M+H]<sup>+</sup> 316.1549, found 316.1542.

***O*-Benzyl 4-(2,4-dimethoxyphenyl)butyrohydroxamate (10f) (Entry 6, Table S1).** Following Coupling Method B, **35f** (1.53 g, 6.82 mmol) was coupled with BnONH<sub>2</sub>•HCl to provide **10f** (1.98 g, 88%), after purification by flash chromatography (SiO<sub>2</sub>, EtOAc): white crystals; mp 72-74 °C (EtOAc/hexanes);  $R_f$  0.64 (EtOAc); FTIR (film)  $\nu_{\max}$  3197 (br), 1656, 1619, 1512, 1288, 1207, 1159, 1037 cm<sup>-1</sup>; <sup>1</sup>H NMR (400 MHz, CD<sub>3</sub>OD)  $\delta$  7.39-7.30 (m, 5 H), 6.91 (d,  $J$  = 8.2 Hz, 1 H), 6.44 (d,  $J$  = 2.3 Hz, 1 H), 6.37 (dd,  $J$  = 2.3, 8.2 Hz, 1 H), 4.80 (s, 2 H), 3.73 (s, 3 H), 3.71 (s, 3 H), 2.48 (t,  $J$  = 7.4 Hz, 2 H), 2.00 (t,  $J$  = 7.4 Hz, 2 H), 1.81-1.74 (m, 2 H); <sup>13</sup>C NMR (100 MHz, CD<sub>3</sub>OD)  $\delta$  171.5, 159.5, 158.3, 135.6, 129.8, 128.9, 128.2, 128.1, 121.6, 103.8, 97.9, 77.5, 54.3 (2 C), 32.0, 28.6, 25.7; HRMS-ESI calcd for C<sub>19</sub>H<sub>23</sub>NO<sub>4</sub>Na [M+Na]<sup>+</sup> 352.1525, found 352.1536.

**Coupling Method C (Preparation of *O*-Methyl Hydroxamates via Intermediacy of Mixed Anhydride).** ***O*-Methyl 2(S)-3-(2,4-dimethoxyphenyl)-2-triisopropylsilyloxypropiohydroxamate (10k) (Entry 11, Table S1).** To a solution of **35k**<sup>4</sup> (376 mg, 0.98 mmol) in CH<sub>2</sub>Cl<sub>2</sub> (6.0 ml) at -20 °C, was sequentially added Et<sub>3</sub>N (207  $\mu$ L, 1.47 mmol) and *i*-BuOCOC<sub>2</sub>Cl (178  $\mu$ L, 1.38 mmol) via syringe. The reaction mixture was then allowed to warm to rt over 1 h and a solution of MeONH<sub>2</sub>•HCl (123 mg, 1.47 mmol) and Et<sub>3</sub>N (207  $\mu$ L, 1.47 mmol) in CH<sub>2</sub>Cl<sub>2</sub> (3.0 ml) added via cannula. After stirring for 16 h, the reaction was diluted with CH<sub>2</sub>Cl<sub>2</sub> (5 ml), quenched with 1 M aqueous HCl (15 ml) and the aqueous phase extracted with CH<sub>2</sub>Cl<sub>2</sub> (3 x 10 ml). The combined organic extracts were dried (MgSO<sub>4</sub>), filtered and concentrated under reduced pressure. The residue was purified by flash chromatography over silica gel (EtOAc/hexanes, 1:1) to afford **10k** (358 mg, 88%): white crystals; mp 93-95 °C (EtOAc/hexanes);  $R_f$  0.13 (EtOAc/hexanes, 1:1);  $[\alpha]_D^{24}$  -29.6 (*c* 1.63, CHCl<sub>3</sub>); FTIR (film)  $\nu_{\max}$  3158 (br), 1668, 1612, 1506, 1460, 1206, 1156, 1117, 1039, 678 cm<sup>-1</sup>; <sup>1</sup>H NMR (500 MHz, CDCl<sub>3</sub>)  $\delta$  8.65 (br s, 1 H), 7.05 (d,  $J$  = 8.1 Hz, 1 H), 6.41-6.38 (m, 2 H, H-5'), 4.55 (t,  $J$  = 5.9 Hz, 1 H), 3.78 (s, 3 H), 3.76 (s, 3 H), 3.70 (s, 3 H), 3.05 (dd,  $J$  = 13.7, 5.8 Hz, 1 H), 2.99 (dd,  $J$  = 13.7, 6.1 Hz, 1 H), 1.05-1.03 (m,

21 H);  $^{13}\text{C}$  NMR (125 MHz,  $\text{CDCl}_3$ )  $\delta$  171.2, 160.4, 159.1, 132.6, 117.3, 104.1, 98.6, 74.1, 64.7, 55.8, 55.4, 36.6, 18.3, 12.5; HRMS-FAB calcd for  $\text{C}_{21}\text{H}_{38}\text{NO}_5\text{Si}$   $[\text{M}+\text{H}]^+$  412.2519, found 412.2510.

## 8. Synthesis of Spirodienones 12

### **(±)-1-Benzyloxy-5-methoxy-1-azaspiro[3.5]nona-5,8-diene-2,7-dione (12b) (Entry 3, Table 1).**

Following general procedure A, cyclization of **10b** (100 mg, 0.33 mmol) and purification of the crude product by flash chromatography (SiO<sub>2</sub>, EtOAc/hexanes, 1:3) afforded **12b** (82 mg, 86%): white crystals; mp 101-102 °C (EtOAc/hexanes); *R*<sub>f</sub> 0.68 (EtOAc); FTIR (film)  $\nu_{\max}$  1786, 1662, 1600, 1222, 1050 cm<sup>-1</sup>; <sup>1</sup>H NMR (500 MHz, CDCl<sub>3</sub>)  $\delta$  7.33-7.24 (m, 5 H), 6.29 (d, *J* = 9.9 Hz, 1 H), 6.01 (d, *J* = 9.9 Hz, 1 H), 5.58 (s, 1 H), 4.83 (s, 2 H), 3.72 (s, 3 H), 3.07 (d, *J* = 13.8 Hz, 1 H), 2.73 (d, *J* = 13.8 Hz, 1 H); <sup>13</sup>C NMR (125 MHz, CDCl<sub>3</sub>)  $\delta$  186.7, 169.2, 164.8, 141.6, 135.4, 131.1, 129.5, 129.4 (2 C), 129.1, 105.4, 79.4, 61.4, 56.5, 43.8; HRMS-ESI calcd for C<sub>16</sub>H<sub>15</sub>NO<sub>4</sub>Na [M+Na]<sup>+</sup> 308.0899, found 308.0892. Anal. Calcd for C<sub>16</sub>H<sub>15</sub>NO<sub>4</sub>; C, 67.36; H, 5.30; N, 4.91. Found: C, 67.23; H, 5.44; N, 4.86.

### **(±)-1,5-Dimethoxy-1-azaspiro[3.5]nona-5,8-diene-2,7-dione (12a) and (±)-1,5,9-Trimethoxy-1-azaspiro[3.5]non-5-ene-2,7-dione (20) (Entry 1, Table 1 and Footnote 31).**

Following general procedure B, cyclization of **10a** (300 mg, 1.33 mmol) and purification of the crude product by flash chromatography (SiO<sub>2</sub>, EtOAc/hexanes, 1:1) afforded **12a** (148 mg, 53%) and **20** (73 mg, 26%). Analytical data for **20**: colorless oil; *R*<sub>f</sub> 0.25 (EtOAc); FTIR (film)  $\nu_{\max}$  1780, 1660, 1615, 1224 cm<sup>-1</sup>; <sup>1</sup>H NMR (500 MHz, CDCl<sub>3</sub>)  $\delta$  5.61 (s, 1 H), 3.87-3.84 (m, 1 H), 3.83 (s, 3 H), 3.81 (s, 3 H), 3.48 (s, 3 H), 3.03, (d, *J* = 13.0 Hz, 1 H), 2.81-2.76 (m, 3 H); <sup>13</sup>C NMR (125 MHz, CDCl<sub>3</sub>)  $\delta$  194.8, 170.3, 163.4, 106.3, 77.7, 66.2, 65.3, 57.8, 57.3, 39.8, 39.5; HRMS-ESI Calcd for C<sub>11</sub>H<sub>16</sub>NO<sub>5</sub> [M+H]<sup>+</sup> 242.1028, found 242.1024.

### **(±)-1-Benzyloxy-6-methoxy-1-azaspiro[4.5]deca-6,9-diene-2,8-dione (12d) (Entry 5, Table 1).**

Following general procedure B, cyclization of **10d** (50 mg, 0.16 mmol) and purification of the crude product by flash chromatography (SiO<sub>2</sub>, EtOAc) afforded **12d** (46 mg, 98%): white crystals; mp 142-143 °C (EtOAc/hexanes); *R*<sub>f</sub> 0.39 (EtOAc); FTIR (film)  $\nu_{\max}$  1723, 1662, 1598, 1367, 1221 cm<sup>-1</sup>; <sup>1</sup>H NMR (400 MHz, CDCl<sub>3</sub>)  $\delta$  7.33-7.26 (m, 5 H), 6.17 (d, *J* = 9.9 Hz, 1 H), 6.09 (d, *J* = 9.9 Hz, 1 H), 5.56 (s, 1 H), 4.93 (s, 2 H), 3.73 (s, 3 H), 2.67-2.57 (m, 1 H), 2.49-2.42 (m, 1 H), 2.22-2.16 (m, 1 H), 2.10-2.02 (m, 1 H); <sup>13</sup>C NMR (100 MHz, CDCl<sub>3</sub>)  $\delta$  186.4, 173.7, 172.9, 144.4, 134.8, 129.9, 129.8 (2 C), 128.9, 128.4 (2 C), 103.0, 78.4, 62.9, 56.2, 27.4, 26.3; HRMS-ESI Calcd for C<sub>17</sub>H<sub>18</sub>NO<sub>4</sub> [M+H]<sup>+</sup> 300.1236, found 300.1240. Anal. Calcd for C<sub>17</sub>H<sub>17</sub>NO<sub>4</sub>; C, 68.21; H, 5.89; N, 4.68. Found: C, 68.11; H, 4.89; N, 4.73.

### **(±)-1,7-Dimethoxy-1-azaspiro[5.5]undeca-7,10-diene-2,9-dione (12e) (Entry 6, Table 1).**

Following general procedure B, cyclization of **10e** (491 mg, 1.94 mmol) and purification of the crude

product by flash chromatography (SiO<sub>2</sub>, EtOAc) afforded **12e** (422 mg, 92%): white crystals; mp 142-143 °C (EtOAc/hexanes); *R<sub>f</sub>* 0.20 (EtOAc); FTIR (film)  $\nu_{\max}$  1702, 1598, 1364, 1223 cm<sup>-1</sup>; <sup>1</sup>H NMR (400 MHz, CDCl<sub>3</sub>)  $\delta$  6.73 (d, *J* = 9.9 Hz, 1 H), 6.19 (dd, *J* = 1.7, 9.9 Hz, 1 H), 5.56 (d, *J* = 1.7 Hz, 1 H), 3.75 (s, 3 H), 3.64 (s, 3 H), 2.54-2.51 (m, 2 H), 2.16-2.11 (m, 1 H), 2.03-1.98 (m, 2 H), 1.85-1.79 (m, 1 H); <sup>13</sup>C NMR (100 MHz, CDCl<sub>3</sub>)  $\delta$  186.6, 173.9, 170.1, 145.8, 129.1, 103.4, 65.7, 64.1, 56.5, 35.7, 33.6, 18.3; HRMS-ESI calcd for C<sub>12</sub>H<sub>15</sub>NO<sub>4</sub>Na [M+Na]<sup>+</sup> 260.0899, found 260.0889.

**(±)-1-Benzyloxy-7-methoxy-1-azaspiro[5.5]undeca-7,10-diene-2,9-dione (12f) (Entry 7, Table 1).** Following general procedure B, cyclization of **10f** (260 mg, 0.79 mmol) and purification of the crude product by flash chromatography (SiO<sub>2</sub>, EtOAc) afforded **12f** (206 mg, 83%): white crystals; mp 175-177 °C (EtOAc/hexanes); *R<sub>f</sub>* 0.44 (EtOAc); FTIR (film)  $\nu_{\max}$  1664, 1630, 1598, 1365, 1222 cm<sup>-1</sup>; <sup>1</sup>H NMR (500 MHz, CDCl<sub>3</sub>)  $\delta$  7.27-7.21 (m, 5 H), 6.51 (d, *J* = 9.9 Hz, 1 H), 6.12 (dd, *J* = 1.6, 9.9 Hz, 1 H), 5.56 (d, *J* = 1.6 Hz, 1 H), 4.84 (s, 2 H), 3.73 (s, 3 H), 2.58 (t, *J* = 6.3 Hz, 2 H), 2.15-2.11 (m, 1 H), 2.04-2.01 (m, 2 H), 1.84-1.81 (m, 1 H); <sup>13</sup>C NMR (125 MHz, CDCl<sub>3</sub>)  $\delta$  187.0, 174.3, 170.9, 146.2, 135.1, 129.7 (2 C), 129.1, 128.9, 128.8 (2 C), 103.3, 78.1, 65.8, 56.7, 35.8, 33.6, 18.3; HRMS-ESI calcd for C<sub>18</sub>H<sub>19</sub>NO<sub>4</sub>Na [M+Na]<sup>+</sup> 336.1236, found 336.1230. Anal. Calcd for C<sub>18</sub>H<sub>19</sub>NO<sub>4</sub>; C, 68.99; H, 6.11; N, 4.47. Found: C, 68.95; H, 6.19; N, 4.49.

**(3*S*\*,5*R*\*)-1,6-Dimethoxy-3-methyl-1-azaspiro[4.5]deca-6,9-diene-2,8-dione (anti-12g) (Entry 8, Table 1).** Following general procedure B, cyclization of **10g** (100 mg, 0.39 mmol) gave a chromatographically inseparable mixture of spirodienone diastereomers [*anti*-**12g**/*syn*-**12g**, 92:8; diastereoisomeric ratio determined by integration of the peaks at  $\delta_{\text{H}}$  (major diastereomer) = 5.61 (d, *J* = 1.7 Hz, C(OCH<sub>3</sub>)CHCO) and  $\delta_{\text{H}}$  (minor) = 5.68 (d, *J* = 1.6 Hz, C(OCH<sub>3</sub>)CHCO) in the crude <sup>1</sup>H NMR] which upon recrystallization (EtOAc/hexanes) yielded *anti*-**12g** (80 mg, 85%): white crystals; mp 146-148 °C (EtOAc/hexanes); *R<sub>f</sub>* 0.30 (EtOAc); FTIR (film)  $\nu_{\max}$  1717, 1662, 1606, 1457, 1227 cm<sup>-1</sup>; <sup>1</sup>H NMR (500 MHz, CDCl<sub>3</sub>)  $\delta$  6.58 (d, *J* = 9.9 Hz, 1 H), 6.30 (dd, *J* = 1.7, 9.9 Hz, 1 H), 5.61 (d, *J* = 1.7 Hz, 1 H), 3.78 (s, 3 H), 3.76 (s, 3 H), 2.84-2.74 (m, 1 H), 2.42 (dd, *J* = 9.5, 13.3 Hz, 1 H), 1.75 (dd, *J* = 9.2, 13.3 Hz, 1 H), 1.29 (d, *J* = 7.1 Hz, 3 H); <sup>13</sup>C NMR (100 MHz, CDCl<sub>3</sub>)  $\delta$  186.4, 175.9, 172.9, 144.9, 130.4, 103.0, 64.7, 62.0, 56.2, 36.7, 32.5, 17.3; HRMS-ESI calcd for C<sub>12</sub>H<sub>16</sub>NO<sub>4</sub> [M+H]<sup>+</sup> 238.1079, found 238.1080. Anal. Calcd for C<sub>12</sub>H<sub>15</sub>NO<sub>4</sub>; C, 60.75; H, 6.37; N, 5.90. Found: C, 60.47; H, 6.25; N, 5.87.



**(3R\*,5R\*)-3-tert-Butyl-1,6-dimethoxy-1-aza-spiro[4.5]deca-6,9-diene-2,8-dione (anti-12h)**  
**(Entry 9, Table 1).** Following general procedure B, cyclization of **10h** (200 mg, 0.68 mmol) gave a mixture of spirodienone diastereomers [*anti-12h/syn-12h*, 87:13; diastereoisomeric ratio determined by integration of the peaks at  $\delta_{\text{H}}$  (major diastereomer) = 5.56 (s, 1 H, *CHCOCHCH*) and  $\delta_{\text{H}}$  (minor) = 5.70 (s, 1 H, *C(OCH<sub>3</sub>)CHCO*) in the crude <sup>1</sup>H NMR], which was purified by flash chromatography (SiO<sub>2</sub>, EtOAc/hexanes, 1:1) and recrystallized (EtOAc/hexanes) to provide *anti-12h* (155 mg, 82%): white needles; mp 150-152 °C (EtOAc/hexanes); *R<sub>f</sub>* 0.30 (EtOAc); FTIR (film)  $\nu_{\text{max}}$  1722, 1666, 1603, 1365, 1224, 856 cm<sup>-1</sup>; <sup>1</sup>H NMR (400 MHz, CDCl<sub>3</sub>)  $\delta$  6.58 (d, *J* = 9.9 Hz, 1 H), 6.29 (dd, *J* = 1.5, 9.9 Hz, 1 H), 5.59 (d, *J* = 1.5 Hz, 1 H), 3.75 (s, 3 H), 3.74 (s, 3 H), 2.53 (t, *J* = 9.6 Hz, 1 H), 2.15 (dd, *J* = 9.8, 13.5 Hz, 1 H), 1.90 (dd, *J* = 9.3, 13.5 Hz, 1 H), 1.04 (s, 9 H); <sup>13</sup>C NMR (100 MHz, CDCl<sub>3</sub>)  $\delta$  186.5, 174.7, 173.3, 145.0, 130.3, 102.9, 64.7, 61.1, 56.2, 46.6, 32.7, 30.9, 26.8; HRMS-ESI calcd for C<sub>15</sub>H<sub>22</sub>NO<sub>4</sub> [M+H]<sup>+</sup> 280.1549, found 280.1556.

**(3S\*,5RS\*)-3-Benzyl-1,6-dimethoxy-1-azaspiro[4.5]deca-6,9-diene-2,8-dione (anti/syn-12i)**  
**(Entry 10, Table 1).** Following general procedure B, cyclization of **12i** (100 mg, 0.30 mmol) gave a mixture of spirodienone diastereomers [*anti-12i/syn-12i* 92:8; diastereoisomeric ratio determined by integration of the peaks at  $\delta_{\text{H}}$  (major diastereomer) = 5.53 (s, 1 H, *C(OCH<sub>3</sub>)CHCO*) and  $\delta_{\text{H}}$  (minor) = 5.63 (s, 1 H, *C(OCH<sub>3</sub>)CHCO*) in the crude <sup>1</sup>H NMR] which was purified by flash chromatography (SiO<sub>2</sub>, EtOAc/hexanes, 1:1) to provide a 92:8 mixture of *anti-12i* and *syn-12i* (93 mg, 98%): colorless oil; *R<sub>f</sub>* 0.17 (EtOAc/hexanes, 1:1); FTIR (film)  $\nu_{\text{max}}$  1720, 1664, 1631, 1601 cm<sup>-1</sup>; <sup>1</sup>H NMR (500 MHz, CDCl<sub>3</sub>)  $\delta$  (major diastereomer) 7.31-7.16 (m, 5 H), 6.23-6.17 (m, 2 H), 5.55 (s, 1 H), 3.72 (s, 3 H), 3.71 (s, 3 H), 3.18 (dd, *J* = 4.1, 13.8 Hz, 1 H), 3.06-3.00 (m, 1 H), 2.84 (dd, *J* = 8.6, 13.8 Hz, 1 H), 2.17 (dd, *J* = 9.7, 13.5 Hz, 1 H), 1.84 (dd, *J* = 8.6, 13.5 Hz, 1 H); <sup>13</sup>C NMR (125 MHz, CDCl<sub>3</sub>)  $\delta$  (major diastereomer) 186.7, 174.6, 173.1, 145.0, 138.0, 130.6, 129.6 (2 C), 129.0 (2 C), 127.3, 103.4, 65.1, 62.3, 56.6, 39.4, 37.7, 33.7; HRMS-ESI calcd for C<sub>18</sub>H<sub>20</sub>NO<sub>4</sub> [M+H]<sup>+</sup> 314.1392, found 314.1397.

**(3R\*,5RS\*)-1,6-Dimethoxy-3-phenyl-1-aza-spiro[4.5]deca-6,9-diene-2,8-dione (anti/syn-12j)**  
**(Entry 11, Table 1).** Following general procedure B, cyclization of **10j** (200 mg, 0.63 mmol) gave a mixture of spirodienone diastereomers [*anti-12j/syn-12j*, 91:9; diastereoisomeric ratio determined by integration of the peaks at  $\delta_{\text{H}}$  (major diastereomer) = 5.66 (d, *J* = 1.6 Hz, 1 H, *C(OCH<sub>3</sub>)CHCO*) and  $\delta_{\text{H}}$  (minor) = 5.74 (d, *J* = 1.6 Hz, 1 H, *C(OCH<sub>3</sub>)CHCO*) in the crude <sup>1</sup>H NMR], which was purified by flash

chromatography (SiO<sub>2</sub>, EtOAc/hexanes, 1:1) to provide a 93:7 mixture of *anti*-**12j** and *syn*-**12j** (162 mg, 85%): pale yellow solid; *R<sub>f</sub>* 0.55 (EtOAc); mp 129-130 °C; FTIR (film)  $\nu_{\max}$  1726, 1664, 1603, 1367, 1225 cm<sup>-1</sup>; <sup>1</sup>H NMR (400 MHz, CDCl<sub>3</sub>)  $\delta$  (major diastereomer) 7.39-7.26 (m, 5 H), 6.67 (d, *J* = 9.9 Hz, 1 H), 6.34 (dd, *J* = 1.6, 9.9 Hz, 1 H), 5.66 (d, *J* = 1.6 Hz, 1 H), 3.67 (t, *J* = 9.7 Hz, 1 H), 3.84 (s, 3 H), 3.82 (s, 3 H), 2.68 (dd, *J* = 10.0, 13.5 Hz, 1 H), 2.18 (dd, *J* = 9.4, 13.5 Hz, 1 H); <sup>13</sup>C NMR (100 MHz, CDCl<sub>3</sub>)  $\delta$  (major diastereomer) 186.2, 173.7, 172.6, 144.3, 138.6, 130.7, 129.1 (2 C), 127.7 (3 C), 103.3, 64.9, 61.9, 56.3, 43.7, 37.3; HRMS-ESI calcd for C<sub>17</sub>H<sub>17</sub>NO<sub>4</sub>Na [M+Na]<sup>+</sup> 322.1055, found 322.1065.

**(3*S*,5*RS*)-1,6-Dimethoxy-3-(triisopropylsilanyloxy)-1-azaspiro[4.5]deca-6,9-diene-2,8-dione (*anti*/*syn*-**12k**) (Entry 12, Table 1).** Following general procedure B, cyclization of **10k** (878 mg, 2.00 mmol) gave a mixture of spirodienone diastereomers [*anti*-**12k**/*syn*-**12k**, 90:10; diastereoisomeric ratio assigned by integration of the peaks at  $\delta_{\text{H}}$  (major diastereomer) = 5.64 (d, *J* = 1.6 Hz, 1 H, C(OCH<sub>3</sub>)CHCO) and  $\delta_{\text{H}}$  (minor) = 5.69 (d, *J* = 1.6 Hz, 1 H, C(OCH<sub>3</sub>)CHCO) in the <sup>1</sup>H NMR spectrum], which was purified by flash chromatography (SiO<sub>2</sub>, EtOAc/hexanes, 3:1) to provide a 90:10 mixture of *anti*-**12k** and *syn*-**12k** (672 mg, 99%): pale yellow oil; *R<sub>f</sub>* 0.27 (EtOAc/hexanes, 1:1); [ $\alpha$ ]<sub>D</sub><sup>24</sup> -44.0 (*c* 1.75, CHCl<sub>3</sub>); FTIR (film)  $\nu_{\max}$  1736, 1666, 1635, 1604 cm<sup>-1</sup>; <sup>1</sup>H NMR (500 MHz, CDCl<sub>3</sub>)  $\delta$  (major diastereomer) 6.68 (d, *J* = 9.9 Hz, 1 H), 6.30 (dd, *J* = 9.9, 1.6 Hz, 1 H), 5.64 (d, *J* = 1.6 Hz, 1 H), 4.59 (dd, *J* = 8.4, 6.6 Hz, 1 H), 3.79 (s, 3 H), 3.76 (s, 3 H), 2.58 (dd, *J* = 13.2, 8.4 Hz, 1 H), 2.03 (dd, *J* = 13.2, 6.6 Hz, 1 H), 1.11-1.06 (m, 21 H); <sup>13</sup>C NMR (100 MHz, CDCl<sub>3</sub>)  $\delta$  (major diastereomer) 186.6, 172.0, 171.0, 144.7, 130.7, 104.2, 67.1, 65.0, 61.6, 56.6, 39.6, 18.2, 12.5; HRMS-ESI calcd for C<sub>20</sub>H<sub>34</sub>NO<sub>5</sub>Si [M+H]<sup>+</sup> 396.2206, found 396.2193.

**1,6-Dimethoxy-4-methyl-1-aza-spiro[4.5]deca-6,9-diene-2,8-dione (*anti*-**12m**) (Entry 14, Table 1)** Following general procedure B, cyclization of **10m** (101 mg, 0.40 mmol) gave a mixture of spirodienone diastereomers [*anti*-**12m**/*syn*-**12m**, 80:20; diastereoisomeric ratio determined by integration of the peaks at  $\delta_{\text{H}}$  (major) = 5.72 (d, *J* = 1.6 Hz, CHCOCHCH) and  $\delta_{\text{H}}$  (minor) = 5.70 (*J* = 1.6 Hz, CHCOCHCH) in the crude <sup>1</sup>H NMR] which were separated by radial chromatography over silica gel (2 mm, EtOAc/hexanes, 1:1) to provide *syn*-**12m** (17 mg, 18%) and *anti*-**12m** (68 mg, 72%): white crystals; mp 134-136 °C (EtOAc/hexanes); *R<sub>f</sub>* 0.37 (EtOAc); FTIR (film)  $\nu_{\max}$  1725, 1665, 1631, 1601 cm<sup>-1</sup>; <sup>1</sup>H NMR (500 MHz, CDCl<sub>3</sub>)  $\delta$  6.57 (d, *J* = 10.1 Hz, 1 H), 6.38 (dd, *J* = 1.6, 10.1 Hz, 1 H), 5.72 (d, *J* = 1.6 Hz, 1 H), 3.82 (s, 3 H), 3.76 (s, 3 H), 2.81-2.70 (m, 2 H), 2.17-2.11 (m, 1 H), 1.03 (d, *J* = 6.8 Hz, 3 H); <sup>13</sup>C

NMR (100 MHz, CDCl<sub>3</sub>)  $\delta$  186.0, 171.9, 171.2, 141.6, 131.0, 104.8, 67.1, 64.2, 56.0, 34.9, 34.0, 15.8; HRMS-Cl calcd for C<sub>12</sub>H<sub>16</sub>NO<sub>4</sub> [M+H]<sup>+</sup> 238.1074, found 238.1067. Anal. Calcd for C<sub>12</sub>H<sub>15</sub>NO<sub>4</sub>; C, 60.75; H, 6.37; N, 5.90. Found: C, 60.83; H, 6.56; N, 5.87.

**(±)-1-Oxo-2-methoxy-3,4-dihydro-2H-isoquinoline-3-spiro-1'-(cyclohexa-2'-methoxy-2',5'dien-4'-one (12n) (Entry 15, Table 1).** Following general procedure B, cyclization of **10n** (150 mg, 0.50 mmol) and purification of the crude product by flash chromatography (SiO<sub>2</sub>, EtOAc/hexanes, 1:1) afforded **12n** (134 mg, 94%): yellow solid; mp 130-131 °C (EtOAc/hexanes); *R<sub>f</sub>* 0.67 (EtOAc); FTIR (film)  $\nu_{\max}$  1684, 1668, 1603, 1459, 1365, 1226, 740 cm<sup>-1</sup>; <sup>1</sup>H NMR (400 MHz, CDCl<sub>3</sub>)  $\delta$  8.16 (d, *J* = 7.5 Hz, 1 H), 7.49 (t, *J* = 7.5 Hz, 1 H), 7.40 (t, *J* = 7.5 Hz, 1 H), 7.13 (d, *J* = 7.5 Hz, 1 H), 6.72 (d, *J* = 10.0 Hz, 1 H), 6.26 (dd, *J* = 1.2, 10.0 Hz, 1 H), 5.65 (d, *J* = 1.2 Hz, 1 H), 3.88 (s, 3 H), 3.74 (s, 3 H), 3.68 (d, *J* = 16.5 Hz, 1 H), 3.20 (d, *J* = 16.5 Hz, 1 H); <sup>13</sup>C NMR (100 MHz, CDCl<sub>3</sub>)  $\delta$  186.0, 172.0, 165.3, 143.7, 134.0, 133.0, 129.6, 128.1, 127.5, 127.4, 127.2, 103.2, 65.2, 64.2, 56.0, 38.8; HRMS-ESI Calcd for C<sub>16</sub>H<sub>15</sub>NO<sub>4</sub>Na [M+Na]<sup>+</sup> 308.0899, found 308.0908.

**(3*S*\*,5*R*\*)-N-(1,6-Dimethoxy-2,8-dioxo-1-aza-spiro[4.5]deca-6,9-dien-3-yl)-benzamide (anti-12l) (Entry 13, Table 1).** To a suspension of phenyliodine(III) bis(trifluoroacetate) (PIFA) (363 mg, 0.84 mmol, 1.2 equiv) in MeOH (3 mL), under an atmosphere of N<sub>2</sub> at -78 °C, was added a cold (-78 °C) solution of **10l** (252 mg, 0.70 mmol) in CH<sub>2</sub>Cl<sub>2</sub> (6 mL) and MeOH (3 mL) via cannula. The reaction mixture was then allowed to warm to -55 °C (internal temperature) over 15 min whereupon H<sub>2</sub>O (3 mL) was added and the cooling bath removed. After stirring for 10 min, the biphasic mixture was partitioned between CH<sub>2</sub>Cl<sub>2</sub> (10 mL) and saturated aqueous NaHCO<sub>3</sub> (5 mL). After separation, the aqueous phase was extracted with CH<sub>2</sub>Cl<sub>2</sub> (3 x 10 mL) and the combined organic extracts dried (MgSO<sub>4</sub>), filtered and concentrated under reduced pressure [*anti-12l*/*syn-12l*, 91:9; diastereoisomeric ratio determined by integration of the peaks at  $\delta_{\text{H}}$  (major) = 5.64 (d, *J* = 1.4 Hz, CHCOCHCH) and  $\delta_{\text{H}}$  (minor) = 5.69 (d, *J* = 1.2 Hz, CHCOCHCH) in the crude <sup>1</sup>H NMR]. Purification of the residue by flash chromatography over silica gel (EtOAc) then afforded a 91:9 mixture of *anti-12l* and *syn-12l* (238 mg, 99%): white solid; mp 198-200 °C (EtOAc/hexanes); *R<sub>f</sub>* 0.30 (EtOAc); FTIR (film)  $\nu_{\max}$  3340, 1728, 1665, 1604, 1533, 1369, 1225, 1001, 755 cm<sup>-1</sup>; <sup>1</sup>H NMR (400 MHz, CDCl<sub>3</sub>)  $\delta$  7.80-7.74 (m, 2 H), 7.60 (d, *J* = 6.4 Hz, 1 H), 7.46 (t, *J* = 7.4 Hz, 1 H), 7.35 (t, *J* = 7.7 Hz, 2 H), 6.73 (d, *J* = 9.9 Hz, 1 H), 6.27 (dd, *J* = 1.4, 9.9 Hz, 1 H), 5.64 (d, *J* = 1.4 Hz, 1 H), 4.82-4.76 (m, 1 H), 3.81 (s, 3 H), 3.74 (s, 3 H), 2.72 (dd, *J* = 9.5, 13.2 Hz, 1 H), 2.31

(dd,  $J = 9.0, 13.2$  Hz, 1 H);  $^{13}\text{C}$  NMR (100 MHz,  $\text{CDCl}_3$ )  $\delta$  186.2, 171.8, 169.7, 167.6, 143.6, 132.8, 132.0, 130.5, 128.5 (2 C), 127.1 (2 C), 103.4, 64.6, 61.4, 56.3, 48.0, 35.9; HRMS-ESI calcd for  $\text{C}_{18}\text{H}_{18}\text{N}_2\text{O}_5\text{Na}$   $[\text{M}+\text{Na}]^+$  365.1113, found 365.1098.

## 9. Ozonolysis of Spirodienones 12

**Methyl ( $\pm$ )-2-Hydroxymethyl-1-benzyloxy-4-oxo-azetidine-2-carboxylate (30b) (Entry 2, Table 2).** Following general procedure C, ozonolysis of **12b** (50 mg, 0.18 mmol) for 25 min and sequential reduction with thiourea and  $\text{NaBH}(\text{OAc})_3$  gave **30b** (38 mg, 82%), after purification by flash chromatography ( $\text{SiO}_2$ , EtOAc/hexanes, 1:3): colorless oil;  $R_f$  0.76 (EtOAc); FTIR (film)  $\nu_{\text{max}}$  3457 (br), 1780, 1747, 1070  $\text{cm}^{-1}$ ;  $^1\text{H}$  NMR (500 MHz,  $\text{CDCl}_3$ )  $\delta$  7.43-7.33 (m, 5 H), 5.04 (s, 2 H), 4.03 (d,  $J = 12.3$  Hz, 1 H), 3.93 (d,  $J = 12.3$  Hz, 1 H), 3.76 (s, 3 H), 2.90 (d,  $J = 13.8$  Hz, 1 H) 2.84 (d,  $J = 13.8$  Hz, 1 H);  $^{13}\text{C}$  NMR (125 MHz,  $\text{CDCl}_3$ )  $\delta$  170.4, 165.8, 135.8, 129.3 (2 C), 128.8, 128.5 (2 C), 78.8, 68.8, 59.4, 52.3, 19.9; HRMS-ESI calcd for  $\text{C}_{13}\text{H}_{15}\text{NO}_5\text{Na}$   $[\text{M}+\text{Na}]^+$  288.0848, found 288.0835.

**Methyl ( $\pm$ )-2-Hydroxymethyl-1-methoxy-5-oxo-pyrrolidine-2-carboxylate (30c) (Entry 3, Table 2).** Following general procedure C, ozonolysis of **12c** (500 mg, 2.24 mmol) for 1 h and sequential reduction with thiourea and  $\text{NaBH}(\text{OAc})_3$  gave **30c** (369 mg, 81%), after purification by flash chromatography ( $\text{SiO}_2$ , EtOAc/hexanes, 1:1).

**Methyl ( $\pm$ )-2-Hydroxymethyl-1-benzyloxy-5-oxo-pyrrolidine-2-carboxylate (30d) (Entry 4, Table 2).** Following general procedure C, ozonolysis of **12d** (50 mg, 0.15 mmol) for 1 h and sequential reduction with thiourea and  $\text{NaBH}(\text{OAc})_3$  gave **30d** (41 mg, 98%), after purification by flash chromatography ( $\text{SiO}_2$ , EtOAc): white crystals; mp 111-113  $^\circ\text{C}$  (EtOAc/hexanes);  $R_f$  0.51 (EtOAc); FTIR (film)  $\nu_{\text{max}}$  3357 (br), 1750, 1688, 1234, 1096, 1058, 747  $\text{cm}^{-1}$ ;  $^1\text{H}$  NMR (400 MHz,  $\text{CD}_3\text{OD}$ )  $\delta$  7.44 (m, 5 H), 5.10 (s, 2 H), 4.00 (d,  $J = 11.8$  Hz, 1 H), 3.85 (d,  $J = 11.8$  Hz, 1 H), 3.74 (s, 3 H), 2.43-2.37 (m, 2 H), 2.36-2.29 (m, 1 H), 2.18-2.13 (m, 1 H);  $^{13}\text{C}$  NMR (100 MHz,  $\text{CD}_3\text{OD}$ )  $\delta$  174.1, 171.4, 135.0, 129.1 (2 C), 128.4, 128.0 (2 C), 77.7, 70.3, 60.4, 51.8, 26.0, 22.9; HRMS-ESI calcd for  $\text{C}_{14}\text{H}_{17}\text{NO}_5\text{Na}$   $[\text{M}]^+$  302.1004, found 302.0992.

**Methyl (2*S*\*,4*S*\*)-2-Hydroxymethyl-1-methoxy-4-methyl-5-oxo-pyrrolidine-2-carboxylate (30g) (Entry 7, Table 2).** Following general procedure C, ozonolysis of **12g** (100 mg, 0.42 mmol) for 1 h and sequential reduction with thiourea and  $\text{NaBH}(\text{OAc})_3$ , gave **30g** (48 mg, 53%), after purification by

flash chromatography (SiO<sub>2</sub>, EtOAc): white solid; mp 66-64 °C (EtOAc/hexanes); *R<sub>f</sub>* 0.56 (EtOAc); IR (film)  $\nu_{\max}$  3429 (br), 1739, 1703, 1444, 1284, 1213, 1063, 1003 cm<sup>-1</sup>; <sup>1</sup>H NMR (400 MHz, CDCl<sub>3</sub>)  $\delta$  3.98 (d, *J* = 11.9 Hz, 1 H), 3.95 (d, *J* = 11.9 Hz, 1 H), 3.91 (s, 3 H), 3.80 (s, 3 H), 2.65-2.55 (m, 1 H), 2.34 (dd, *J* = 9.3, 13.3 Hz, 1 H), 2.29 (br s, 1 H), 1.83 (dd, *J* = 9.3, 13.3 Hz, 1 H), 1.25 (d, *J* = 7.2 Hz, 3 H); <sup>13</sup>C NMR (100 MHz, CDCl<sub>3</sub>)  $\delta$  175.2, 172.2, 68.0, 64.1, 63.8, 52.9, 32.6, 32.0, 16.3; HRMS-ESI calcd for C<sub>9</sub>H<sub>15</sub>NO<sub>5</sub>Na [M+Na]<sup>+</sup> 240.0848, found 240.0852.

**Methyl (2*S*\*,4*S*\*)-4-*tert*-Butyl-2-hydroxymethyl-1-methoxy-5-oxo-pyrrolidine-2-carboxylate (30h) (Entry 8, Table 2).** Following general procedure C, ozonolysis of **12h** (200 mg, 0.72 mmol) for 1 h and sequential reduction with thiourea and NaBH(OAc)<sub>3</sub> gave **30h** (110 mg, 59%), after purification by flash chromatography (SiO<sub>2</sub>, EtOAc/hexanes, 1:1): white crystals; mp 112-115 °C (EtOAc/hexanes); *R<sub>f</sub>* 0.37 (EtOAc); FTIR (film)  $\nu_{\max}$  3384, 1739, 1682, 1367, 1068, 1011, 773 cm<sup>-1</sup>; <sup>1</sup>H NMR (400 MHz, CDCl<sub>3</sub>)  $\delta$  4.03 (d, *J* = 11.7 Hz, 1 H), 3.93 (d, *J* = 11.7 Hz, 1 H), 3.86 (s, 3 H), 3.79 (s, 3 H), 2.38 (t, *J* = 9.8 Hz, 1 H), 2.12-1.98 (m, 2 H), 1.03 (s, 9 H); <sup>13</sup>C NMR (125 MHz, CD<sub>3</sub>OD)  $\delta$  174.4, 172.5, 66.9, 64.2, 64.0, 52.9, 46.3, 32.5, 26.9 (4 C); HRMS-ESI calcd for C<sub>12</sub>H<sub>21</sub>NO<sub>5</sub>Na [M+Na]<sup>+</sup> 282.1317, found 282.1328.

**Methyl (2*S*\*,4*S*\*)-4-Benzyl-2-hydroxymethyl-1-methoxy-5-oxo-pyrrolidine-2-carboxylate (30i) (Entry 9, Table 2).** Following general procedure C, ozonolysis of **12i** (318 mg, 1.01 mmol) for 1 h and sequential reduction with thiourea and NaBH(OAc)<sub>3</sub> provided **30i** (250 mg, 84%; 91% based upon cleavage of *anti*-**12i**), after purification by flash chromatography (SiO<sub>2</sub>, EtOAc): colorless oil; *R<sub>f</sub>* 0.63 (EtOAc); FTIR (film)  $\nu_{\max}$  3417 (br), 1738, 1703, 1444, 1068, 736 cm<sup>-1</sup>; <sup>1</sup>H NMR (400 MHz, CDCl<sub>3</sub>)  $\delta$  7.31-7.16 (m, 5 H), 3.89 (s, 3 H), 3.85 (br s, 2 H), 3.75 (s, 3 H), 3.25 (dd, *J* = 3.9, 13.7 Hz, 1 H), 2.84 (dddd, *J* = 3.9, 9.2, 9.6, 9.9 Hz, 1 H), 2.70 (dd, *J* = 9.9, 13.7 Hz, 1 H), 2.35 (br s, 1 H), 2.08 (dd, *J* = 9.6, 13.5 Hz, 1 H), 1.93 (dd, *J* = 9.2, 13.5 Hz, 1 H); <sup>13</sup>C NMR (125 MHz, CDCl<sub>3</sub>)  $\delta$  174.3, 172.4, 138.6, 129.5 (2 C), 129.0 (2 C), 127.1, 68.5, 64.5, 63.8, 53.3, 39.2, 37.3, 30.2; HRMS-ESI calcd for C<sub>15</sub>H<sub>19</sub>NO<sub>5</sub> [M+Na]<sup>+</sup> 316.1161, found 316.1162.

**Methyl (2*S*\*,4*S*\*)-2-Hydroxymethyl-1-methoxy-5-oxo-4-phenyl-pyrrolidine-2-carboxylate (30j) (Entry 10, Table 2).** Following general procedure C, ozonolysis of **12j** (36 mg, 0.12 mmol) for 30 min and sequential reduction with thiourea and NaBH(OAc)<sub>3</sub> provided *anti*-**30j** (25 mg, 75%; 81% based upon cleavage of *anti*-**12j**), after purification by flash chromatography (SiO<sub>2</sub>, EtOAc/hexanes, 1:1): white

solid; mp 145-147 °C (EtOAc/hexanes);  $R_f$  0.80 (EtOAc); FTIR (film)  $\nu_{\max}$  3425 (br), 1741, 1707, 1055, 748  $\text{cm}^{-1}$ ;  $^1\text{H}$  NMR (400 MHz,  $\text{CDCl}_3$ )  $\delta$  7.36-7.26 (m, 5 H), 4.04 (br s, 2 H), 3.94 (s, 3 H), 3.84 (s, 3 H), 3.79 (t,  $J = 9.9$  Hz, 1 H), 2.57 (dd,  $J = 9.9, 13.5$  Hz, 1 H), 2.34 (dd,  $J = 10.0, 13.5$  Hz, 1 H);  $^{13}\text{C}$  NMR (100 MHz,  $\text{CD}_3\text{OD}$ )  $\delta$  173.1, 172.0, 138.2, 128.9 (2 C), 128.0 (2 C), 127.6, 67.7, 64.3, 63.2, 53.1, 43.5, 33.0; HRMS-ESI calcd for  $\text{C}_{14}\text{H}_{18}\text{NO}_5$   $[\text{M}+\text{H}]^+$  280.1185, found 280.1179.

**Methyl (2S,4RS\*)-2-Hydroxymethyl-1-methoxy-5-oxo-4-(triisopropylsilanyloxy)-pyrrolidine-2-carboxylate (30k) (Entry 11, Table 2).** Following general procedure C, ozonolysis of **12k** (525 mg, 1.33 mmol) for 1 h and sequential reduction with thiourea and  $\text{NaBH}(\text{OAc})_3$  provided **30k** as a 91:9 mixture of *anti*-**30k** and *syn*-**30k** (454 mg, 91%), after purification by flash chromatography ( $\text{SiO}_2$ , EtOAc/hexanes, 1:3): pale yellow oil;  $R_f$  0.56 (EtOAc/hexanes, 1:1);  $[\alpha]_D^{24} -30.3$  ( $c$  1.63,  $\text{CHCl}_3$ ); FTIR (film)  $\nu_{\max}$  3444 (br), 1739, 1462, 1175, 1058  $\text{cm}^{-1}$ ;  $^1\text{H}$  NMR (500 MHz,  $\text{CDCl}_3$ )  $\delta$  4.47 (dd,  $J = 8.4, 6.8$  Hz, 1 H), 4.00-3.98 (m, 2 H), 3.97 (s, 3 H), 3.80 (s, 3 H), 2.61 (br s, 1 H), 2.53 (dd,  $J = 13.4, 8.4$  Hz, 1 H), 2.11 (dd,  $J = 13.4, 6.8$  Hz, 1 H), 1.09-1.07 (m, 21 H);  $^{13}\text{C}$  NMR (125 MHz,  $\text{CDCl}_3$ )  $\delta$  172.1, 170.5, 67.8, 67.0, 64.4, 64.1, 53.4, 36.1, 18.2, 12.5; HRMS-ESI calcd for  $\text{C}_{17}\text{H}_{33}\text{NO}_6\text{SiNa}$   $[\text{M}+\text{Na}]^+$  398.1975, found 398.1958.

**Methyl (2S\*,4S\*)-4-Benzoylamino-2-hydroxymethyl-1-methoxy-5-oxo-pyrrolidine-2-carboxylate (30l) (Entry 12, Table 2).** Following general procedure C, ozonolysis of **12l** (100 mg, 0.29 mmol) for 1 h and sequential reduction with thiourea and  $\text{NaBH}(\text{OAc})_3$  provided **30l** (43 mg, 46%), after purification by flash chromatography ( $\text{SiO}_2$ , EtOAc): colorless oil;  $R_f$  0.37 (EtOAc); FTIR (film)  $\nu_{\max}$  3346 (br), 1734, 1717, 1646, 1540, 1435, 1059, 754  $\text{cm}^{-1}$ ;  $^1\text{H}$  NMR (400 MHz,  $\text{CDCl}_3$ )  $\delta$  7.73 (d,  $J = 7.5$  Hz, 2 H), 7.59 (d,  $J = 7.6$  Hz, 1 H), 7.42 (t,  $J = 7.3$  Hz, 1 H), 7.32 (t,  $J = 7.6$  Hz, 2 H), 4.90 (dd,  $J = 7.6, 16.9$  Hz, 1 H), 4.10 (dd,  $J = 5.6, 12.0$  Hz, 1 H), 3.89-3.84 (m, 4 H), 3.80 (s, 3 H), 3.70 (t,  $J = 6.1$  Hz, 1 H), 2.79 (dd,  $J = 9.8, 13.5$  Hz, 1 H), 2.29 (dd,  $J = 7.3, 13.5$  Hz, 1 H);  $^{13}\text{C}$  NMR (100 MHz,  $\text{CDCl}_3$ )  $\delta$  171.0, 170.2, 167.6, 133.0, 131.8, 128.5, 127.2, 68.6, 63.9, 61.3, 53.1, 46.7, 32.4; HRMS-ESI calcd for  $\text{C}_{15}\text{H}_{19}\text{N}_2\text{O}_6$   $[\text{M}+\text{H}]^+$  323.1243, found 323.1245.

**Methyl ( $\pm$ )-3-Hydroxymethyl-2-methoxy-1-oxo-1.2.3.4-tetrahydroisoquinoline-3-carboxylate (30n) (Entry 14, Table 2).** Following general procedure C, ozonolysis of **12n** (105 mg, 0.37 mmol) for 30 min and sequential reduction with thiourea and  $\text{NaBH}(\text{OAc})_3$  gave **30n** (82 mg, 84%), after purification by flash chromatography ( $\text{SiO}_2$ , EtOAc): white crystals; mp 179-180 °C;  $R_f$  0.46 (EtOAc); FTIR (film)  $\nu_{\max}$

3411 (br), 1725, 1654, 1224, 1029, 732  $\text{cm}^{-1}$ ;  $^1\text{H}$  NMR (500 MHz,  $\text{CDCl}_3$ )  $\delta$  8.13 (d,  $J = 7.7$  Hz, 1 H), 7.47 (t,  $J = 7.5$  Hz, 1 H), 7.38 (t,  $J = 7.5$  Hz, 1 H), 7.17 (d,  $J = 7.5$  Hz, 1 H), 4.23 (dd,  $J = 4.3, 11.9$  Hz, 1 H), 4.06-4.01 (m, 4 H), 3.69 (s, 3 H), 3.51, (d,  $J = 16.3$  Hz, 1 H), 3.38 (d,  $J = 16.3$  Hz, 1 H), 2.72 (dd,  $J = 4.3, 9.7$  Hz, 1 H, OH);  $^{13}\text{C}$  NMR (125 MHz,  $\text{CDCl}_3$ )  $\delta$  171.5, 165.3, 133.9, 132.9, 128.3, 127.6 (2 C), 127.4, 72.2, 65.0, 64.6, 53.1, 35.4; HRMS-ESI calcd for  $\text{C}_{13}\text{H}_{15}\text{NO}_5\text{Na}$   $[\text{M}+\text{Na}]^+$  288.0848, found 288.0842.

**Methyl ( $\pm$ )-2-Acetoxyethyl-1-benzyloxy-6-oxo-piperidine-2-carboxylate (30f) (Entry 6, Table 2).** Following general procedure D, ozonolysis of **12f** (50 mg, 0.16 mmol) for 3 h, sequential reduction with thiourea and  $\text{NaBH}(\text{OAc})_3$  then acetylation of the crude product gave **30f** (30 mg, 56%), after purification by flash chromatography ( $\text{SiO}_2$ , EtOAc): white crystals; mp 111-113  $^\circ\text{C}$  (EtOAc/hexanes);  $R_f$  0.62 (EtOAc); IR (film)  $\nu_{\text{max}}$  1746, 1683, 1235  $\text{cm}^{-1}$ ;  $^1\text{H}$  NMR (500 MHz,  $\text{CDCl}_3$ )  $\delta$  7.40-7.27 (m, 5 H), 5.13 (d,  $J = 9.6$  Hz, 1 H), 4.87 (d,  $J = 9.6$  Hz, 1 H), 4.57 (d,  $J = 11.9$  Hz, 1 H), 4.53 (d,  $J = 11.9$  Hz, 1 H), 3.77 (s, 3 H), 2.63-2.51 (m, 2 H), 2.22-2.12 (m, 2 H), 2.11 (s, 3 H), 1.87-1.83 (m, 2 H);  $^{13}\text{C}$  NMR (125 MHz,  $\text{CDCl}_3$ )  $\delta$  170.6, 170.4, 170.3, 135.1, 129.2 (2 C), 128.5, 128.4 (2 C), 77.4, 70.4, 63.6, 53.1, 33.2, 30.9, 21.0, 17.7; HRMS-ESI calcd for  $\text{C}_{17}\text{H}_{21}\text{NO}_6\text{Na}$   $[\text{M}+\text{Na}]^+$  358.1267, found 358.1273.

**Methyl ( $\pm$ )-2-Hydroxyethyl-1-methoxy-5-oxo-pyrrolidine-2-carboxylate (30c) (Entry 3, Table 2).** Following general procedure E, Luche reduction of **12c** (98 mg, 0.44 mmol), ozonolysis of the resulting dienylic alcohols for 30 min and sequential reduction with thiourea and  $\text{NaBH}(\text{OAc})_3$  provided **30c** (68 mg, 76%), after purification by flash chromatography ( $\text{SiO}_2$ , EtOAc).

**Methyl ( $\pm$ )-2-Hydroxyethyl-1-benzyloxy-5-oxo-pyrrolidine-2-carboxylate (30d) (Entry 4, Table 2).** Following general procedure E, Luche reduction of **12d** (165 mg, 0.55 mmol), ozonolysis of the resulting dienylic alcohols for 30 min and sequential reduction with thiourea and  $\text{NaBH}(\text{OAc})_3$  provided **30d** (145 mg, 94%), after purification by flash chromatography ( $\text{SiO}_2$ , EtOAc).

**Methyl ( $\pm$ )-2-Hydroxyethyl-1-methoxy-6-oxo-piperidine-2-carboxylate (30e) (Entry 5, Table 2).** Following general procedure E, Luche reduction of **12e** (148 mg, 0.62 mmol), ozonolysis of the resulting dienylic alcohols for 30 min and sequential reduction with thiourea and  $\text{NaBH}(\text{OAc})_3$  provided **30e** (95 mg, 70%), after purification by flash chromatography ( $\text{SiO}_2$ , EtOAc): white crystals; mp 95-97  $^\circ\text{C}$  (EtOAc/hexanes);  $R_f$  0.33 (EtOAc); IR (film)  $\nu_{\text{max}}$  3406, 1739, 1655, 1367, 1242, 1068, 748  $\text{cm}^{-1}$ ;  $^1\text{H}$  NMR (400 MHz,  $\text{CDCl}_3$ )  $\delta$  4.03 (d,  $J = 11.7$  Hz, 1 H), 3.97 (d,  $J = 11.7$  Hz, 1 H), 3.86 (s, 3 H), 3.81 (s, 3 H),

2.57-2.43 (m, 3 H), 2.27-2.19 (m, 1 H), 2.16-2.10 (m, 1 H), 1.84-1.74 (m, 2 H);  $^{13}\text{C}$  NMR (100 MHz,  $\text{CDCl}_3$ )  $\delta$  172.3, 170.2, 72.2, 64.3, 63.5, 52.9, 33.1, 30.5, 17.5; HRMS-ESI calcd for  $\text{C}_9\text{H}_{15}\text{NO}_5\text{Na}$   $[\text{M}+\text{Na}]^+$  240.0848, found 240.0855.

**Methyl ( $\pm$ )-2-Hydroxymethyl-1-benzyloxy-6-oxo-piperidine-2-carboxylate (30f) (Entry 6, Table 2).** Following general procedure E, Luche reduction of **12f** (108 mg, 0.34 mmol) and ozonolysis of the resulting dienylic alcohols for 30 min and sequential reduction with thiourea and  $\text{NaBH}(\text{OAc})_3$  provided **30f** (66 mg, 65%), after purification by flash chromatography ( $\text{SiO}_2$ , EtOAc): yellow solid; mp 120-122 °C (EtOAc/hexanes);  $R_f$  0.38 (EtOAc); IR (film)  $\nu_{\text{max}}$  3406, 1739, 1658, 1371, 1242, 1065, 752  $\text{cm}^{-1}$ ;  $^1\text{H}$  NMR (400 MHz,  $\text{CDCl}_3$ )  $\delta$  7.42-7.35 (m, 5 H), 5.12 (d,  $J = 9.9$  Hz, 1 H), 5.07 (d,  $J = 9.9$  Hz, 1 H), 3.92 (d,  $J = 11.9$  Hz, 1 H), 3.89 (d,  $J = 11.9$  Hz, 1 H), 3.79 (s, 3 H), 2.57-2.49 (m, 2 H), 2.25-2.04 (m, 3 H), 1.87-1.72 (m, 2 H);  $^{13}\text{C}$  NMR (100 MHz,  $\text{CDCl}_3$ )  $\delta$  172.2, 170.4, 135.1, 129.5, 128.8, 128.6, 77.4, 72.4, 64.2, 52.9, 33.2, 30.6, 17.6; HRMS-ESI calcd for  $\text{C}_{15}\text{H}_{19}\text{NO}_5\text{Na}$   $[\text{M}+\text{Na}]^+$  316.1161, found 316.1149.

**Methyl (2*S*\*,4*S*\*)-2-Hydroxymethyl-1-methoxy-4-methyl-5-oxo-pyrrolidine-2-carboxylate (30g) (Entry 7, Table 2).** Following general procedure E, Luche reduction of **12g** (122 mg, 0.51 mmol), ozonolysis of the resulting dienylic alcohols for 30 min and sequential reduction with thiourea and  $\text{NaBH}(\text{OAc})_3$  provided **30g** (75 mg, 67%), after purification by flash chromatography ( $\text{SiO}_2$ , EtOAc).

**Methyl (2*S*\*,4*S*\*)-4-*tert*-Butyl-2-hydroxymethyl-1-methoxy-5-oxo-pyrrolidine-2-carboxylate (30h) (Entry 8, Table 2).** Following general procedure E, Luche reduction of **12h** (49 mg, 0.18 mmol), ozonolysis of the resulting dienylic alcohols for 30 min and sequential reduction with thiourea and  $\text{NaBH}(\text{OAc})_3$  provided **30h** (38 mg, 84%), after purification by flash chromatography ( $\text{SiO}_2$ , EtOAc).

**Methyl (2*S*\*,4*S*\*)-4-Benzyl-2-hydroxymethyl-1-methoxy-5-oxo-pyrrolidine-2-carboxylate (30i) (Entry 9, Table 2).** Following general procedure E, Luche reduction of **12i** (111 mg, 0.35 mmol), ozonolysis of the resulting dienylic alcohols for 30 min and sequential reduction with thiourea and  $\text{NaBH}(\text{OAc})_3$  provided **30i** (87 mg, 84%), after purification by flash chromatography ( $\text{SiO}_2$ , EtOAc).

**Methyl (2*S*\*,4*S*\*)-2-Hydroxymethyl-1-methoxy-5-oxo-4-(triisopropylsilyloxy)-pyrrolidine-2-carboxylate (30k) (Entry 11, Table 2).** Following general procedure E, Luche reduction of **12k** (133 mg, 0.34 mmol), ozonolysis of the resulting dienylic alcohols for 30 min and sequential reduction with thiourea and  $\text{NaBH}(\text{OAc})_3$  provided **30k** (112 mg, 89%), after purification by flash chromatography ( $\text{SiO}_2$ , EtOAc/hexanes, 1:1).



**Methyl (2*S*\*,4*S*\*)-4-Benzoylamino-2-hydroxymethyl-1-methoxy-5-oxo-pyrrolidine-2-carboxylate (30l) (Entry 12, Table 2).** Following general procedure E, Luche reduction of **12l** (82 mg, 0.24 mmol), ozonolysis of the resulting dienylic alcohols for 30 min and sequential reduction with thiourea and NaBH(OAc)<sub>3</sub> provided **30l** (65 mg, 84%), after purification by flash chromatography (SiO<sub>2</sub>, EtOAc).

**Methyl (2*S*\*,3*R*\*)-2-Acetoxyethyl-1-methoxy-3-methyl-5-oxo-pyrrolidine-2-carboxylate (30m) (Entry 13, Table 2).** Following general procedure E, Luche reduction **12m** (148 mg, 0.62 mmol), ozonolysis of the resulting dienylic alcohols for 30 min and sequential reduction with thiourea and NaBH(OAc)<sub>3</sub> provided the crude product. This material was dissolved in a mixture of pyridine (1.5 mL) and Ac<sub>2</sub>O (1 mL) and stirred at room temperature for 12 h. The reaction mixture was then concentrated under reduced pressure and the resulting oil purified by flash chromatography (SiO<sub>2</sub>, EtOAc/hexanes, 1:1) to provide **30m** (50 mg, 31%): colorless oil; *R<sub>f</sub>* 0.57 (EtOAc); IR (film)  $\nu_{\max}$  1749, 1733, 1253, 1229, 1043 cm<sup>-1</sup>; <sup>1</sup>H NMR (400 MHz, CDCl<sub>3</sub>)  $\delta$  4.64 (d, *J* = 12.2 Hz, 1 H), 4.37 (d, *J* = 12.2 Hz, 1 H), 3.92 (s, 3 H), 3.82 (s, 3 H), 2.63-2.51 (m, 2 H), 2.12-2.07 (m, 1 H), 2.04 (s, 3 H), 1.18 (d, *J* = 6.5 Hz, 3 H); <sup>13</sup>C NMR (100 MHz, CDCl<sub>3</sub>)  $\delta$  172.3, 170.5, 170.0, 70.9, 63.9, 60.3, 53.0, 35.2, 32.3, 20.8, 14.5; HRMS-ESI calcd for C<sub>11</sub>H<sub>18</sub>NO<sub>6</sub> [M+H]<sup>+</sup> 260.1134, found 260.1132.

**Methyl (±)-3-Hydroxymethyl-2-methoxy-1-oxo-1.2.3.4-tetrahydroisoquinoline-3-carboxylate (30n) (Entry 14, Table 2).** Following general procedure E, Luche reduction **12n** (84 mg, 0.29 mmol), ozonolysis of the resulting dienylic alcohols for 30 min and sequential reduction with thiourea and NaBH(OAc)<sub>3</sub> provided **30n** (30 mg, 38%), after purification by flash chromatography (SiO<sub>2</sub>, EtOAc/hexanes, 1:1).

## 10. Reductive Cleavage of *N*-Alkoxy Lactams

**Methyl (±)-2-Hydroxymethyl-5-oxo-pyrrolidine-2-carboxylate (32c) (Entry 2, Table 4).** Following general procedure F, reduction of **30c** (65 mg, 0.32 mmol) and purification by flash chromatography (SiO<sub>2</sub>, EtOAc) provided **32c** (57 mg, 88%): white crystals; mp 133-135 °C (EtOAc/hexanes); *R<sub>f</sub>* 0.17 (EtOAc); FTIR (film)  $\nu_{\max}$  3324 (br), 1735, 1688, 1228, 1050 cm<sup>-1</sup>; <sup>1</sup>H NMR (500 MHz, CD<sub>3</sub>OD)  $\delta$  3.84 (d, *J* = 11.2 Hz, 1 H), 3.77 (s, 3 H), 3.64 (d, *J* = 11.2 Hz, 1 H), 2.38-2.35 (m, 2 H), 2.31-2.26 (m, 1 H), 2.17-2.11 (m, 1 H); <sup>13</sup>C NMR (125 MHz, CD<sub>3</sub>OD)  $\delta$  179.4, 173.6, 68.1, 66.6, 52.1, 29.8, 27.0; HRMS-ESI calcd for C<sub>7</sub>H<sub>11</sub>NO<sub>4</sub>Na [M+Na]<sup>+</sup> 196.0586, found 196.0593.

**Methyl (2*S*\*,4*S*\*)-2-Hydroxymethyl-4-methyl-5-oxo-pyrrolidine-2-carboxylate (32g) (Entry 3, Table 4).** Following general procedure F, reduction of **30g** (63 mg, 0.29 mmol) and purification by flash chromatography (SiO<sub>2</sub>, EtOAc) provided **32g** (40 mg, 70%): colorless oil; *R<sub>f</sub>* 0.19 (EtOAc); FTIR (film)  $\nu_{\max}$  3357 (br), 1739, 1691, 1452, 1228, 1099, 598 cm<sup>-1</sup>; <sup>1</sup>H NMR (400 MHz, CDCl<sub>3</sub>)  $\delta$  7.52 (s, 1 H), 4.56 (br s, 1 H), 3.99 (d, *J* = 11.4 Hz, 1 H), 3.77 (s, 3 H), 3.59 (d, *J* = 11.4 Hz, 1 H), 2.58-2.46 (m, 2 H), 1.70-1.61 (m, 1 H), 1.16 (d, *J* = 6.8 Hz, 3 H); <sup>13</sup>C NMR (125 MHz, CD<sub>3</sub>OD)  $\delta$  180.6, 173.6, 67.7, 66.2, 52.9, 35.8, 35.4, 15.7; HRMS-ESI calcd for C<sub>8</sub>H<sub>13</sub>NO<sub>4</sub>Na [M+Na]<sup>+</sup> 210.0742, found 210.0743.

**Methyl (2*S*\*,4*S*\*)-4-*tert*-Butyl-2-hydroxymethyl-5-oxo-pyrrolidine-2-carboxylate (32h) (Entry 4, Table 4).** Following general procedure F, reduction of **30h** (39 mg, 0.15 mmol) and purification by flash chromatography (SiO<sub>2</sub>, EtOAc) provided **32h** (20 mg, 59%): white crystals; mp 108-110 °C (EtOAc/hexanes); *R<sub>f</sub>* 0.35 (EtOAc); FTIR (film)  $\nu_{\max}$  3342 (br), 1738, 1695, 1365, 1223, 1062, 756 cm<sup>-1</sup>; <sup>1</sup>H NMR (400 MHz, CDCl<sub>3</sub>)  $\delta$  7.27 (br s, 1 H), 4.02 (dd, *J* = 6.5, 11.2 Hz, 1 H), 3.82 (t, *J* = 6.5 Hz, 1 H), 3.78 (s, 3 H), 3.59 (dd, *J* = 6.5, 11.2 Hz, 1 H), 2.39-2.25 (m, 2 H), 1.81 (dd, *J* = 10.6, 12.8 Hz, 1 H), 1.01 (s, 9 H); <sup>13</sup>C NMR (100 MHz, CDCl<sub>3</sub>)  $\delta$  178.7, 174.0, 67.6, 64.5, 52.9, 49.5, 32.0, 30.5, 27.1; HRMS-ESI calcd for C<sub>11</sub>H<sub>19</sub>NO<sub>4</sub>Na [M+Na]<sup>+</sup> 252.1212, found 252.1217.

**Methyl (2*S*\*,4*S*\*)-4-Benzyl-2-hydroxymethyl-5-oxo-pyrrolidine-2-carboxylate (32i) (Entry 5, Table 4).** Following general procedure F, reduction of **30i** (89 mg, 0.30 mmol) and purification product by flash chromatography (SiO<sub>2</sub>, EtOAc) provided **32i** (58 mg, 73%): white crystals; mp 130-132 °C (EtOAc/hexanes); *R<sub>f</sub>* 0.21 (EtOAc); FTIR (film)  $\nu_{\max}$  3357 (br), 1741, 1697, 1685, 1456, 1228, 1045, 752 cm<sup>-1</sup>; <sup>1</sup>H NMR (500 MHz, CD<sub>3</sub>OD)  $\delta$  7.29-7.17 (m, 5 H), 3.76 (d, *J* = 11.1 Hz, 1 H), 3.71 (s, 3 H), 3.36 (d, *J* = 11.1 Hz, 1 H), 3.12 (dd, *J* = 4.0, 13.6 Hz, 1 H), 2.83-2.75 (m, 1 H), 2.67 (dd, *J* = 9.5, 13.6 Hz, 1 H), 2.23 (dd, *J* = 9.0, 13.5 Hz, 1 H), 1.79 (dd, *J* = 9.7, 13.5 Hz, 1 H); <sup>13</sup>C NMR (100 MHz, CD<sub>3</sub>OD)  $\delta$  179.5, 173.4, 138.8, 128.7, 128.2, 126.1, 66.3, 65.8, 51.8, 42.3, 36.0, 32.3; HRMS-ESI calcd for C<sub>14</sub>H<sub>17</sub>NO<sub>4</sub>Na [M+Na]<sup>+</sup> 286.1055, found 286.1058.

**Methyl (2*S*\*,4*S*\*)-2-Hydroxymethyl-5-oxo-4-phenyl-pyrrolidine-2-carboxylate (32j) (Entry 6, Table 4).** Following general procedure F, reduction of **30j** (146 mg, 0.52 mmol) and purification by flash chromatography (SiO<sub>2</sub>, EtOAc) provided **32j** (85 mg, 65%): white crystals; mp 136-138 °C (EtOAc/hexanes); *R<sub>f</sub>* 0.24 (EtOAc); FTIR (film)  $\nu_{\max}$  3343 (br), 1736, 1697, 1231, 1049, 755, 702 cm<sup>-1</sup>; <sup>1</sup>H NMR (500 MHz, CDCl<sub>3</sub>)  $\delta$  7.36-7.21 (m, 6 H), 3.97-3.96 (m, 1 H), 3.80 (s, 3 H), 3.59-3.56 (m, 2 H), 2.75

(dd,  $J = 9.4, 13.3$  Hz, 1 H), 2.18 (dd,  $J = 11.0, 13.3$  Hz, 1 H), 1.87 (br s, 1 H, OH);  $^{13}\text{C}$  NMR (100 MHz,  $\text{CDCl}_3$ )  $\delta$  178.0, 173.4, 138.1, 128.9, 128.2, 127.4, 67.3, 65.6, 53.1, 46.9, 36.7; HRMS-ESI calcd for  $\text{C}_{13}\text{H}_{16}\text{NO}_4$   $[\text{M}+\text{H}]^+$  250.1079, found 250.1070.

**Methyl (2S,4S\*)-2-Hydroxymethyl-5-oxo-4-(triisopropylsilanyloxy)-pyrrolidine-2-carboxylate (32k) (Entry 7, Table 4).** Following general procedure F, reduction of **30k** (250 mg, 067 mmol) and purification by flash chromatography ( $\text{SiO}_2$ , EtOAc/hexanes, 1:3) provided **32k** (205 mg, 90%): colorless oil;  $R_f$  0.33 (EtOAc);  $[\alpha]_D^{24} -28.2$  ( $c$  1.00,  $\text{CHCl}_3$ ); FTIR (film)  $\nu_{\text{max}}$  3336 (br), 1720, 1463, 1163, 883, 685  $\text{cm}^{-1}$ ;  $^1\text{H}$  NMR (500 MHz,  $\text{CDCl}_3$ )  $\delta$  7.08 (br s, 1 H), 4.45 (t,  $J = 7.5$  Hz, 1 H), 3.99 (d,  $J = 11.3$  Hz, 1 H), 3.79 (s, 3 H), 3.69 (d,  $J = 11.3$  Hz, 1 H), 3.47 (br s, 1 H), 2.60 (dd,  $J = 13.4, 8.0$  Hz, 1 H), 1.99 (dd,  $J = 13.4, 7.0$  Hz, 1 H), 1.17-1.06 (m, 21 H);  $^{13}\text{C}$  NMR (125 MHz,  $\text{CDCl}_3$ )  $\delta$  176.1, 173.4, 69.9, 68.1, 64.6, 53.4, 38.4, 18.2, 12.5; HRMS-ESI calcd for  $\text{C}_{16}\text{H}_{31}\text{NO}_5\text{SiNa}$   $[\text{M}+\text{Na}]^+$  368.1869, found 368.1869.

**Methyl (2S\*,4S\*)-4-Benzoylamino-2-hydroxymethyl-5-oxo-pyrrolidine-2-carboxylate (32l) (Entry 8, Table 4).** Following general procedure F, reduction of **30l** (85 mg, 0.26 mmol) and purification by flash chromatography ( $\text{SiO}_2$ , EtOAc) provided **32l** (60 mg, 77%): white solid; mp 82-83 °C (EtOAc/hexanes);  $R_f$  0.07 (EtOAc); FTIR (film)  $\nu_{\text{max}}$  3317 (br), 1734, 1716, 1645, 1541, 1309, 1055, 912  $\text{cm}^{-1}$ ;  $^1\text{H}$  NMR (400 MHz,  $\text{CDCl}_3$ )  $\delta$  7.83 (s, 1 H), 7.77 (d,  $J = 7.6$  Hz, 2 H), 7.73 (d,  $J = 7.3$  Hz, 1 H), 7.43 (t,  $J = 7.3$  Hz, 1 H), 7.33 (t,  $J = 7.6$  Hz, 1 H), 4.78 (dd,  $J = 8.9, 16.8$  Hz, 1 H), 4.58 (br s, 1 H), 3.93 (dd,  $J = 5.4, 11.6$  Hz, 1 H), 3.73-3.67 (m, 4 H), 2.75 (dd,  $J = 9.3, 13.3$  Hz, 1 H), 2.14 (dd,  $J = 9.3, 13.3$  Hz, 1 H);  $^{13}\text{C}$  NMR (100 MHz,  $\text{CDCl}_3$ )  $\delta$  176.0, 173.0, 167.8, 133.0, 131.9, 128.5, 127.2, 66.0, 65.3, 53.1, 50.5, 34.2; HRMS-ESI calcd for  $\text{C}_{14}\text{H}_{16}\text{N}_2\text{O}_5\text{Na}$   $[\text{M}+\text{Na}]^+$  315.0957, found 315.0956.

**Methyl ( $\pm$ )-2-Acetoxymethyl-6-oxo-piperidine-2-carboxylate (32e) (Entry 9, Table 4).** Following general procedure F, reduction of **30e** (24 mg, 0.09 mmol) and purification by flash chromatography ( $\text{SiO}_2$ , EtOAc) provided **32e** (16 mg, 76%): white crystals; mp 54-56 °C (EtOAc/hexanes);  $R_f$  0.20 (EtOAc); FTIR (film)  $\nu_{\text{max}}$  3243 (br), 1742, 1672, 1237, 1044  $\text{cm}^{-1}$ ;  $^1\text{H}$  NMR (400 MHz,  $\text{CDCl}_3$ )  $\delta$  6.25 (br s, 1 H), 4.47 (d,  $J = 10.9$  Hz, 1 H), 4.04 (d,  $J = 10.9$  Hz, 1 H), 3.79 (s, 3 H), 2.46-2.35 (m, 2 H), 2.20-2.16 (m, 1 H), 2.07 (s, 3 H), 1.91-1.85 (m, 1 H), 1.81-1.67 (m, 2 H);  $^{13}\text{C}$  NMR (100 MHz,  $\text{CDCl}_3$ )  $\delta$  172.0, 171.2, 170.0, 69.1, 62.3, 53.2, 31.0, 27.8, 20.6, 17.8; HRMS-ESI calcd for  $\text{C}_{10}\text{H}_{15}\text{NO}_5$   $[\text{M}+\text{Na}]^+$  252.0848, found 252.0845.

**Methyl (2*S*\*,3*S*\*)-2-Acetoxyethyl-3-methyl-5-oxo-pyrrolidine-2-carboxylate (32m) (Entry 10, Table 4).** Following general procedure F, reduction of **30m** (24 mg, 0.09 mmol) and purification by flash chromatography (SiO<sub>2</sub>, EtOAc) provided **32m** (18 mg, 86%): colorless oil; *R<sub>f</sub>* 0.24 (EtOAc); FTIR (film)  $\nu_{\max}$  3235 (br), 1744, 1706, 1236, 1045 cm<sup>-1</sup>; <sup>1</sup>H NMR (500 MHz, CDCl<sub>3</sub>)  $\delta$  6.11 (br s, 1 H), 4.52 (d, *J* = 11.1 Hz, 1 H), 4.14 (d, *J* = 11.1 Hz, 1 H), 3.81 (s, 3 H), 2.75-2.67 (m, 1 H), 2.54 (dd, *J* = 8.7, 16.8 Hz, 1 H), 2.15 (dd, *J* = 9.5, 16.8 Hz, 1 H), 2.08 (s, 3 H), 1.25 (d, *J* = 7.1 Hz, 3 H); <sup>13</sup>C NMR (125 MHz, CDCl<sub>3</sub>)  $\delta$  175.4, 171.8, 170.3, 66.4, 65.5, 53.1, 37.9, 36.5, 20.7, 14.4; HRMS-ESI calcd for C<sub>10</sub>H<sub>15</sub>NaNO<sub>5</sub> [M+Na]<sup>+</sup> 252.0848, found 252.0847.

**Methyl (±)-3-Hydroxyethyl-1-oxo-1,2,3,4-tetrahydroisoquinoline-3-carboxylate (32n) (Entry 11, Table 4).** Following general procedure F, reduction of **30n** (29 mg, 0.11 mmol) and purification by flash chromatography (SiO<sub>2</sub>, EtOAc) provided **32n** (19 mg, 74%): white crystals; mp 131-133 °C (EtOAc/hexanes); *R<sub>f</sub>* 0.29 (EtOAc); FTIR (film)  $\nu_{\max}$  3332 (br), 1739, 1660, 1465, 1205, 1085, 744 cm<sup>-1</sup>; <sup>1</sup>H NMR (400 MHz, CDCl<sub>3</sub>)  $\delta$  8.04 (d, *J* = 7.5 Hz, 1 H), 7.63 (s, 1 H, NH), 7.47 (t, *J* = 7.5 Hz, 1 H), 7.36 (t, *J* = 7.5 Hz, 1 H), 7.20 (d, *J* = 7.5 Hz, 1 H), 4.07, (dd, *J* = 9.7, 13.3 Hz, 1 H), 3.90-3.85 (m, 2 H), 3.71 (s, 3 H), 3.28 (d, *J* = 16.0 Hz, 1 H), 3.16 (d, *J* = 16.0 Hz, 1 H); <sup>13</sup>C NMR (100 MHz, CDCl<sub>3</sub>)  $\delta$  172.6, 166.3, 135.2, 132.9, 128.1, 127.7, 127.6 (2 C), 67.6, 64.1, 53.2, 33.0; HRMS-ESI calcd for C<sub>12</sub>H<sub>13</sub>NO<sub>4</sub>Na [M+Na]<sup>+</sup> 258.0742, found 258.0745.

**Methyl (±)-2-(2-Ethoxycarbonylvinyl)-5-oxo-pyrrolidine-2-carboxylate (33) (Entry 12, Table 4).** Following general procedure F, reduction of **27** (87 mg, 0.32 mmol) and purification by flash chromatography (SiO<sub>2</sub>, EtOAc/hexanes, 1:1) provided **33** (56 mg, 73%): colorless oil; *R<sub>f</sub>* 0.34 (EtOAc); FTIR (film)  $\nu_{\max}$  3220 (br), 1716, 1655, 1313, 1259, 1184, 1034, 984 cm<sup>-1</sup>; <sup>1</sup>H NMR (400 MHz, CDCl<sub>3</sub>)  $\delta$  7.11 (d, *J* = 15.7 Hz, 1 H), 7.08 (br s, 1 H, NH), 6.06 (d, *J* = 15.7 Hz, 1 H), 4.21 (q, *J* = 7.1 Hz, 2 H), 3.81 (s, 3 H), 2.63-2.55 (m, 1 H), 2.41-2.38 (m, 2 H), 2.27-2.20 (m, 1 H), 1.29 (t, *J* = 7.2 Hz, 3 H); <sup>13</sup>C NMR (100 MHz, CDCl<sub>3</sub>)  $\delta$  177.2, 171.3, 165.5, 145.6, 121.4, 66.2, 60.9, 53.4, 32.0, 29.0, 14.2; HRMS-ESI calcd for C<sub>11</sub>H<sub>16</sub>NO<sub>5</sub> [M+H]<sup>+</sup> 242.1028, found 242.1021.

**Methyl (±)-1-Hydroxy-2-hydroxyethyl-5-oxo-pyrrolidine-2-carboxylate (34d) (Entry 2, Table 5).** Following general procedure G, hydrogenolysis of **30d** (32 mg, 0.11 mmol) and purification by flash chromatography over silica gel (EtOAc) provided **34d** (20 mg, 90%): colorless oil; *R<sub>f</sub>* 0.03 (EtOAc); FTIR (film)  $\nu_{\max}$  3352 (br), 1737, 1689, 1252, 1076 cm<sup>-1</sup>; <sup>1</sup>H NMR (500 MHz, CD<sub>3</sub>OD)  $\delta$  3.96 (d, *J* =

11.9 Hz 1 H), 3.89 (d,  $J = 11.9$  Hz, 1 H), 3.74 (s, 3 H), 2.40-2.37 (m, 2 H), 2.32-2.27 (m, 1 H), 2.14-2.10 (m, 1 H);  $^{13}\text{C}$  NMR (100 MHz,  $\text{CD}_3\text{OD}$ )  $\delta$  173.0, 171.9, 70.8, 60.7, 52.1, 26.6, 22.9; HRMS-ESI calcd for  $\text{C}_7\text{H}_{11}\text{NO}_5\text{Na}$   $[\text{M}+\text{Na}]^+$  212.0535, found 212.0539.

**Methyl ( $\pm$ )-2-Acetoxyethyl-1-hydroxy-6-oxo-piperidine-2-carboxylate (34f) (Entry 3, Table 5).** Following general procedure G, hydrogenolysis of **30f** (20 mg, 0.06 mmol) and purification by flash chromatography ( $\text{SiO}_2$ , EtOAc) provided **34f** (15 mg, 99%): colorless oil;  $R_f$  0.59 (EtOAc); FTIR (film)  $\nu_{\text{max}}$  3194 (br), 1744, 1641, 1236, 1053  $\text{cm}^{-1}$ ;  $^1\text{H}$  NMR (500 MHz,  $\text{CDCl}_3$ )  $\delta$  4.67 (d,  $J = 11.8$  Hz, 1 H), 4.46 (d,  $J = 11.8$  Hz, 1 H), 3.82 (s, 3 H), 2.60-2.57 (m, 1 H), 2.53-2.46 (m, 1 H), 2.28-2.22 (m, 1 H), 2.16-2.12 (m, 1 H), 2.11 (s, 3 H), 1.87-1.81 (m, 2 H);  $^{13}\text{C}$  NMR (125 MHz,  $\text{CDCl}_3$ )  $\delta$  171.0, 170.7, 168.4, 69.2, 63.6, 53.6, 31.2, 30.4, 21.3, 17.8; HRMS-ESI calcd for  $\text{C}_{10}\text{H}_{16}\text{NO}_6$   $[\text{M}+\text{H}]^+$  246.0978, found 246.0975.

# 11. $^1\text{H}$ and $^{13}\text{C}$ NMR Spectra for Compounds 12a-34f

## Compound 12a

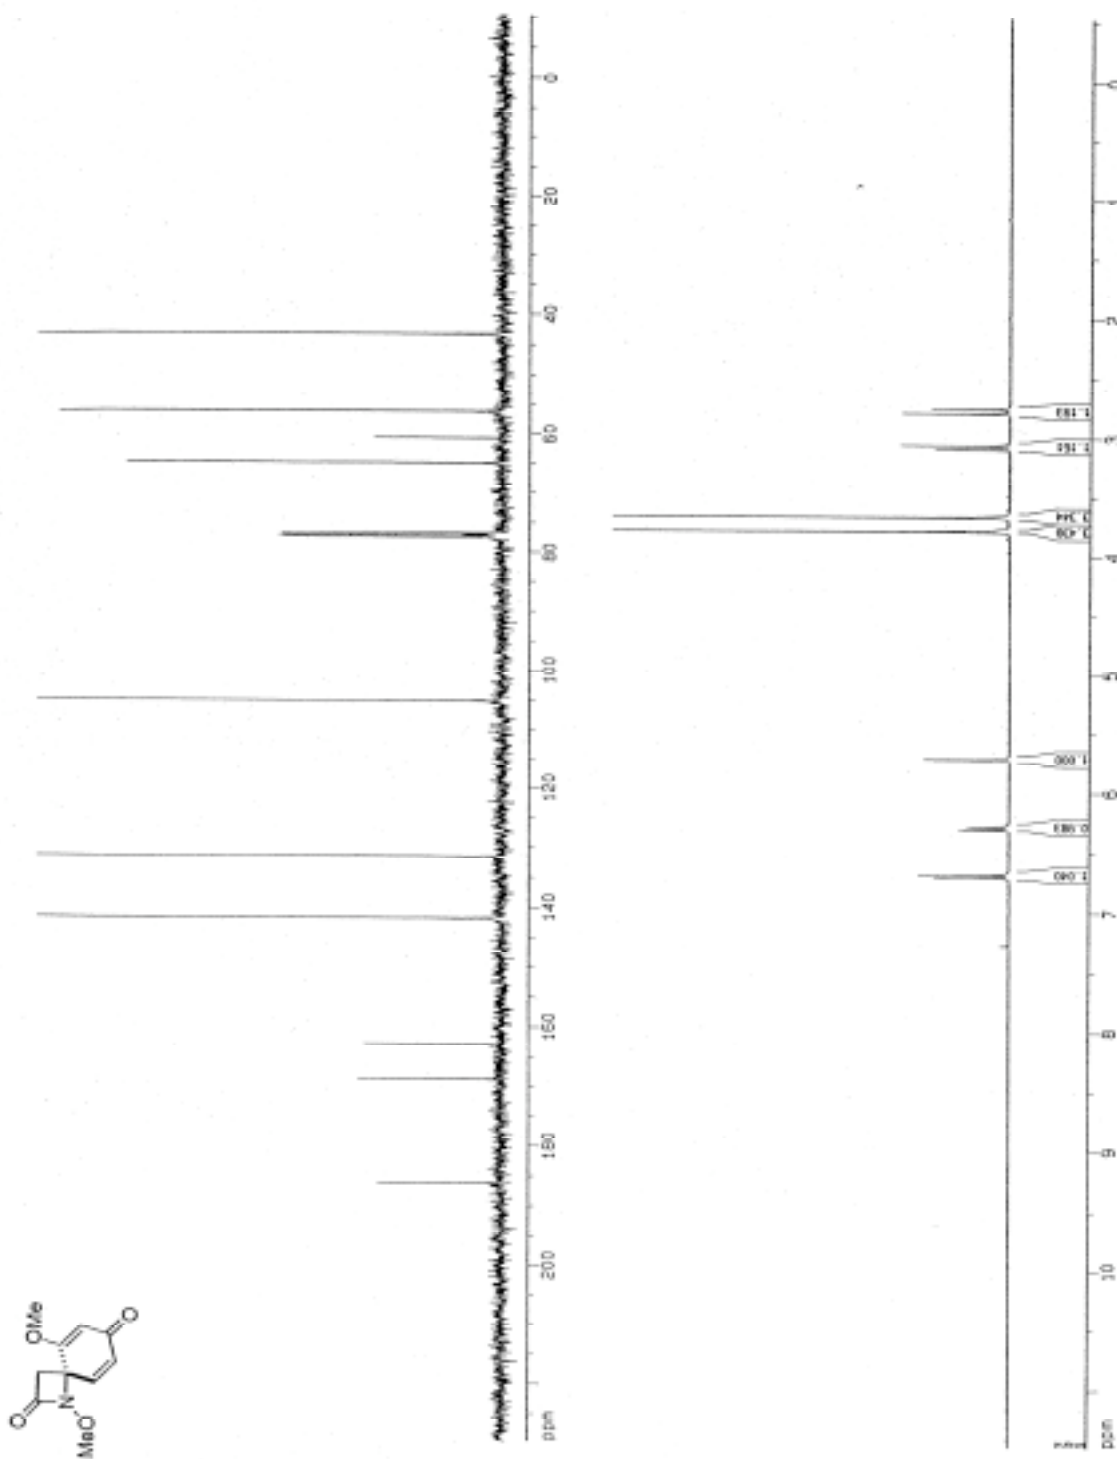







# Compound 12c

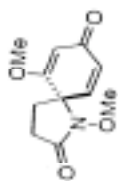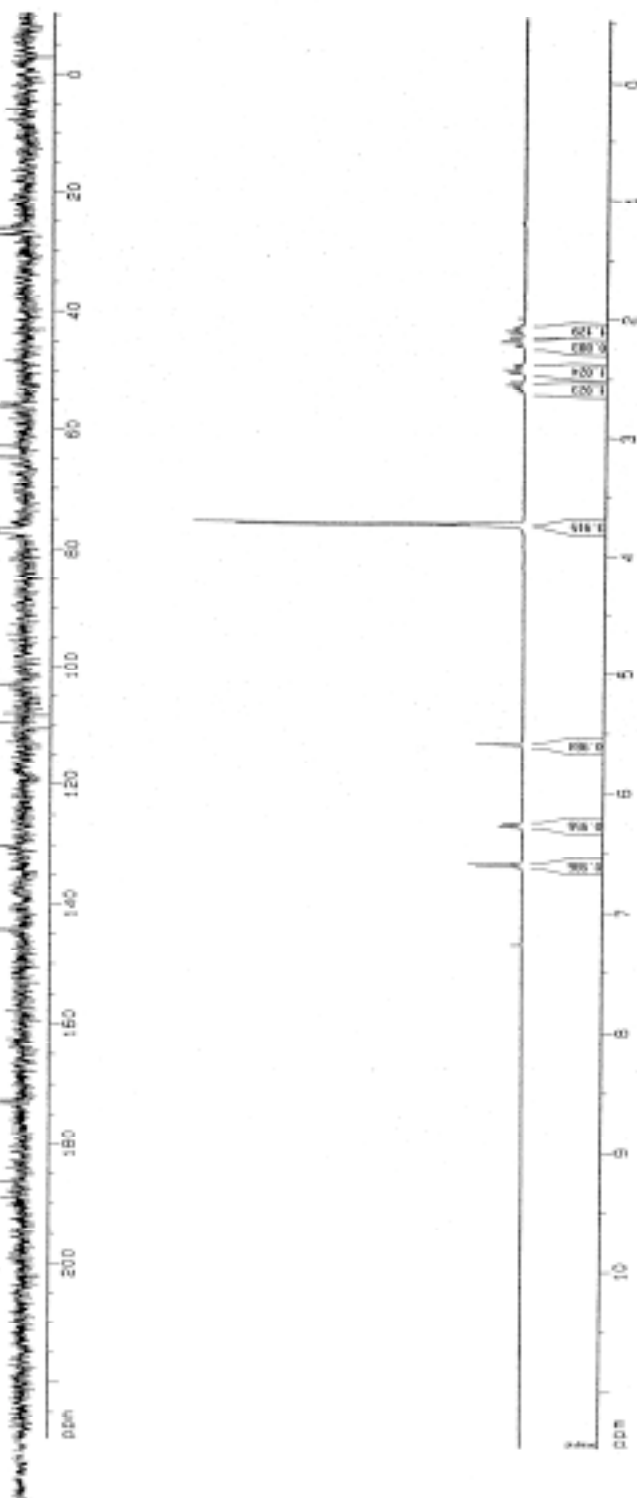

# Compound 12d

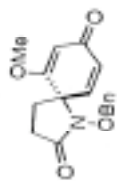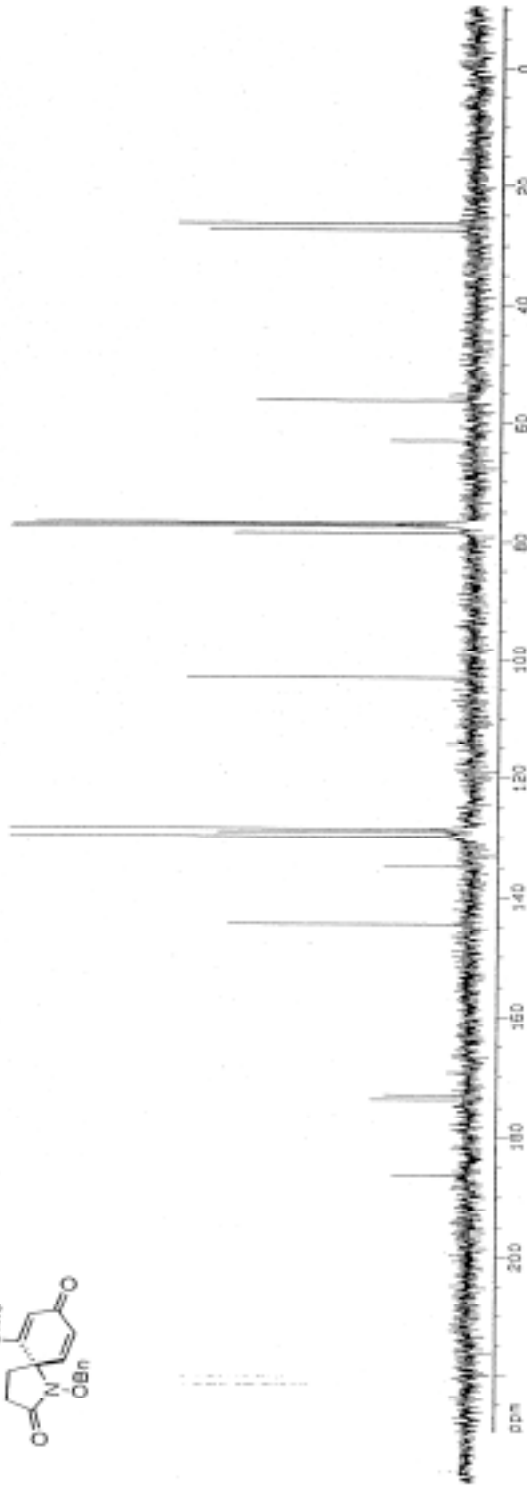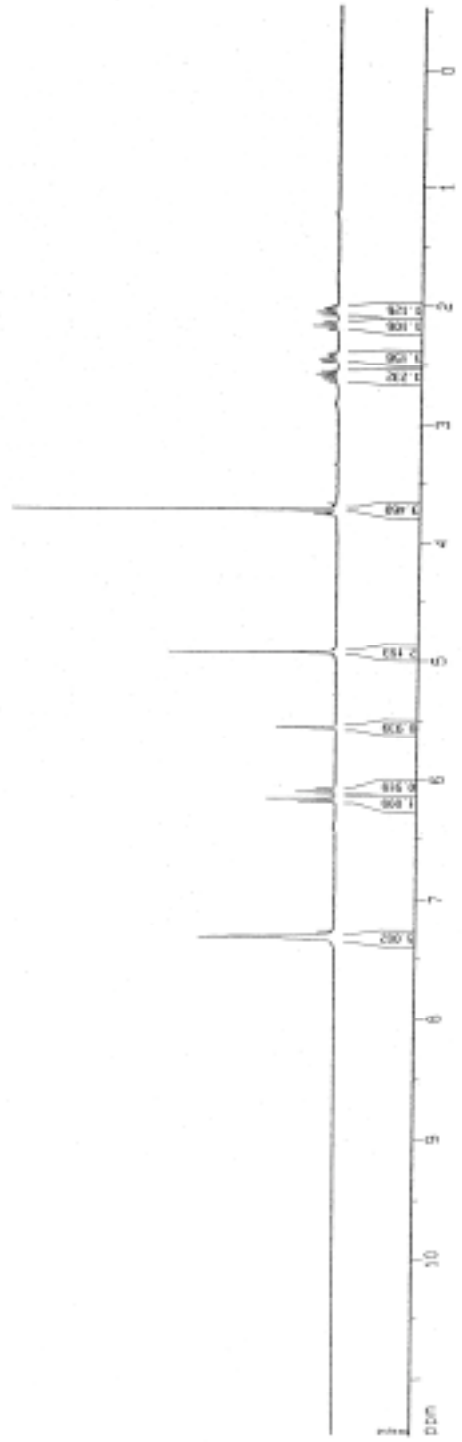

# Compound 12e

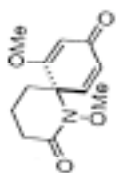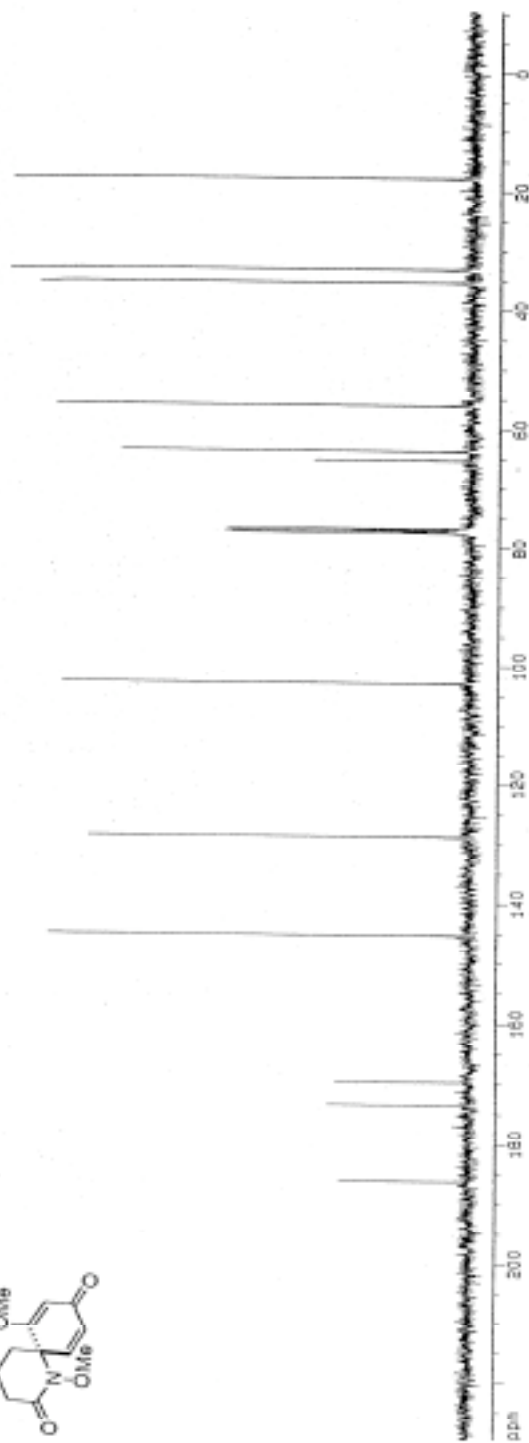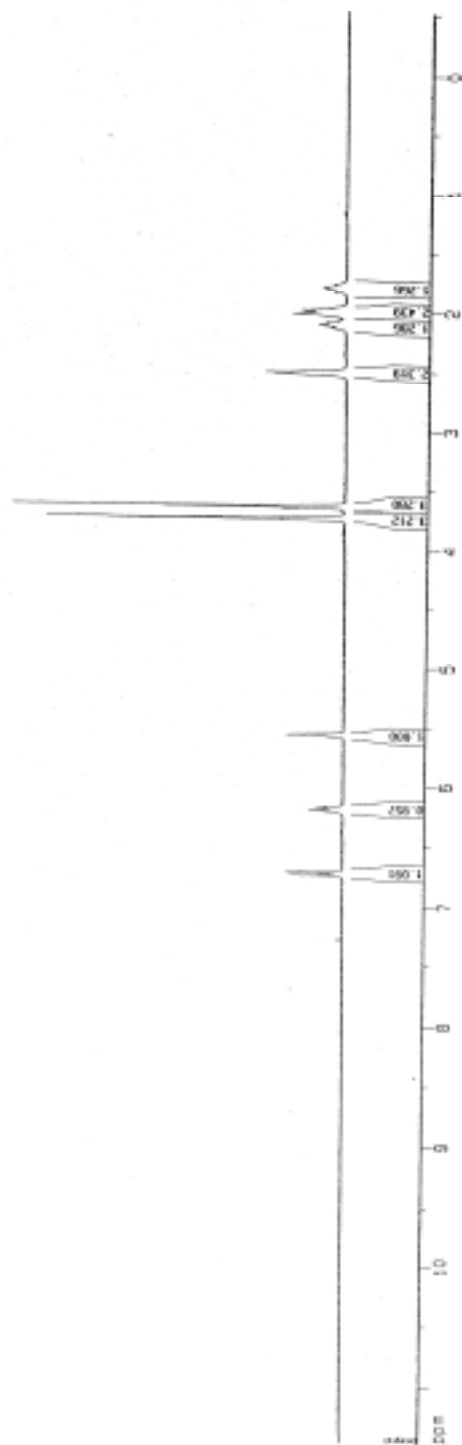

# Compound 12f

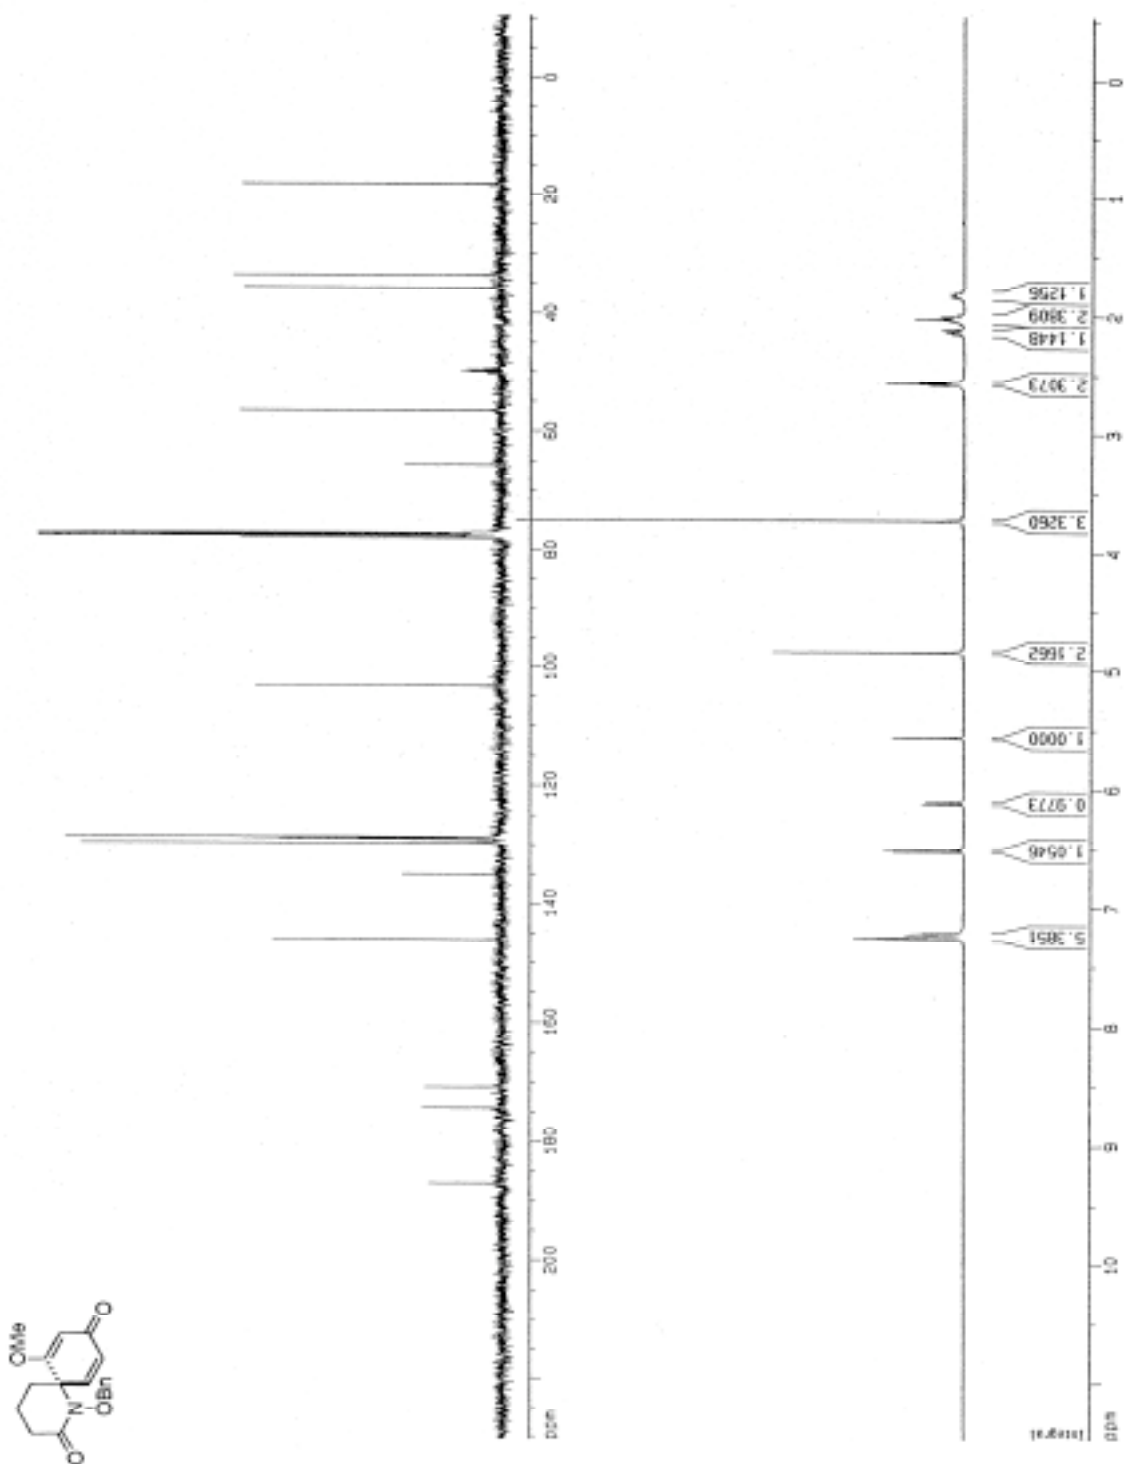

# Compound 12g

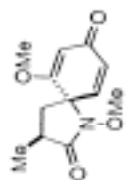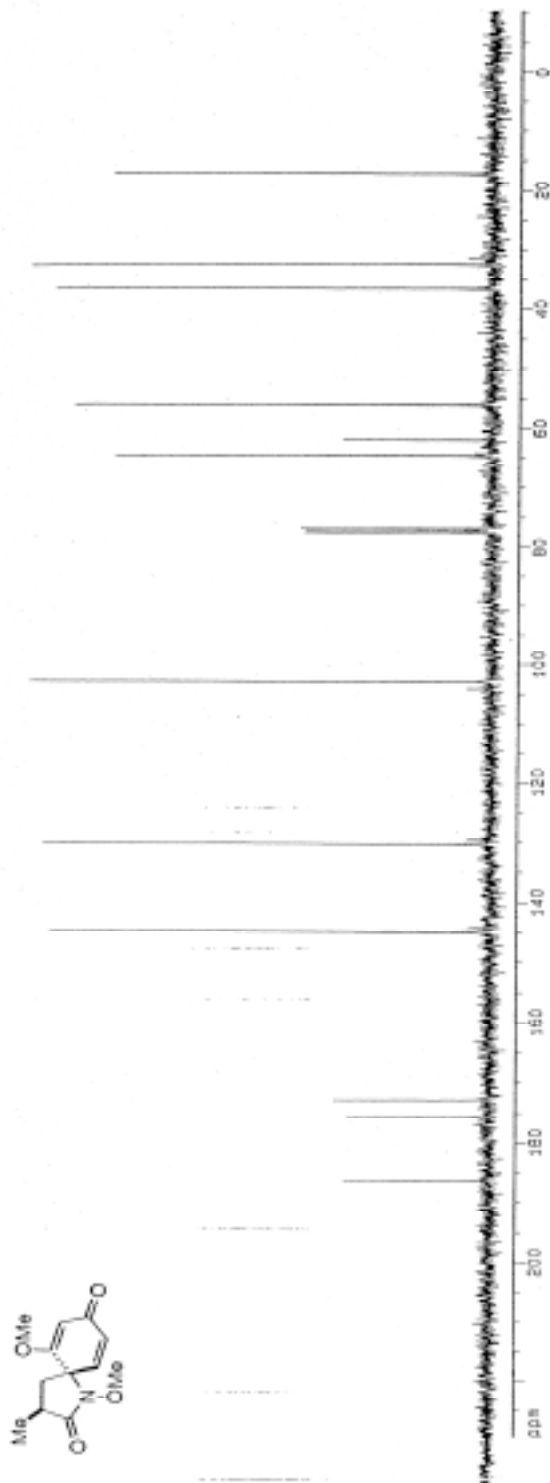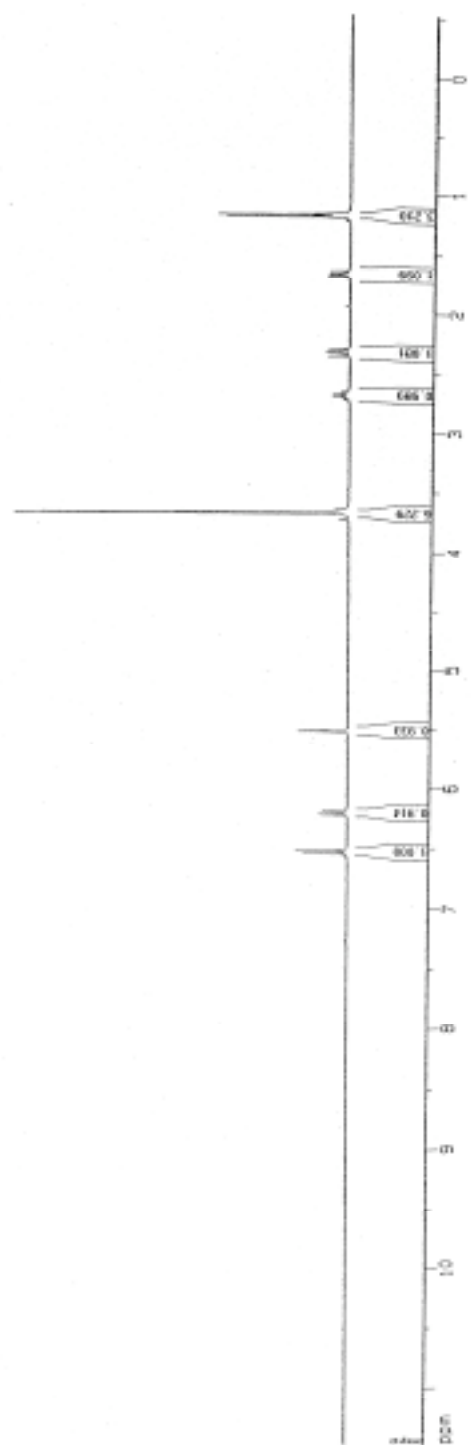

# Compound 12h

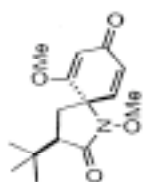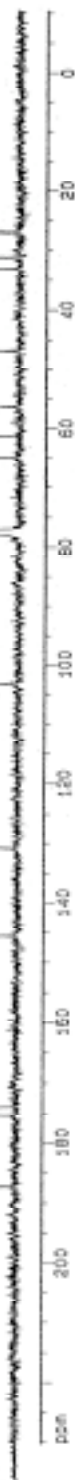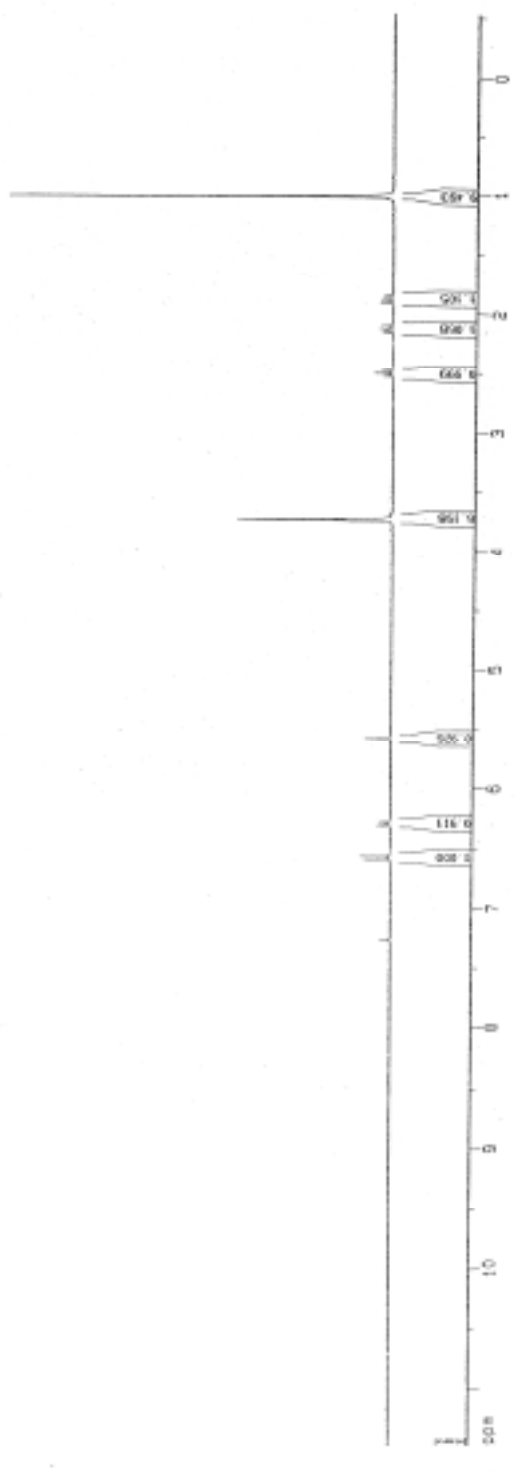

# Compound 12i

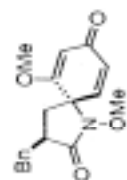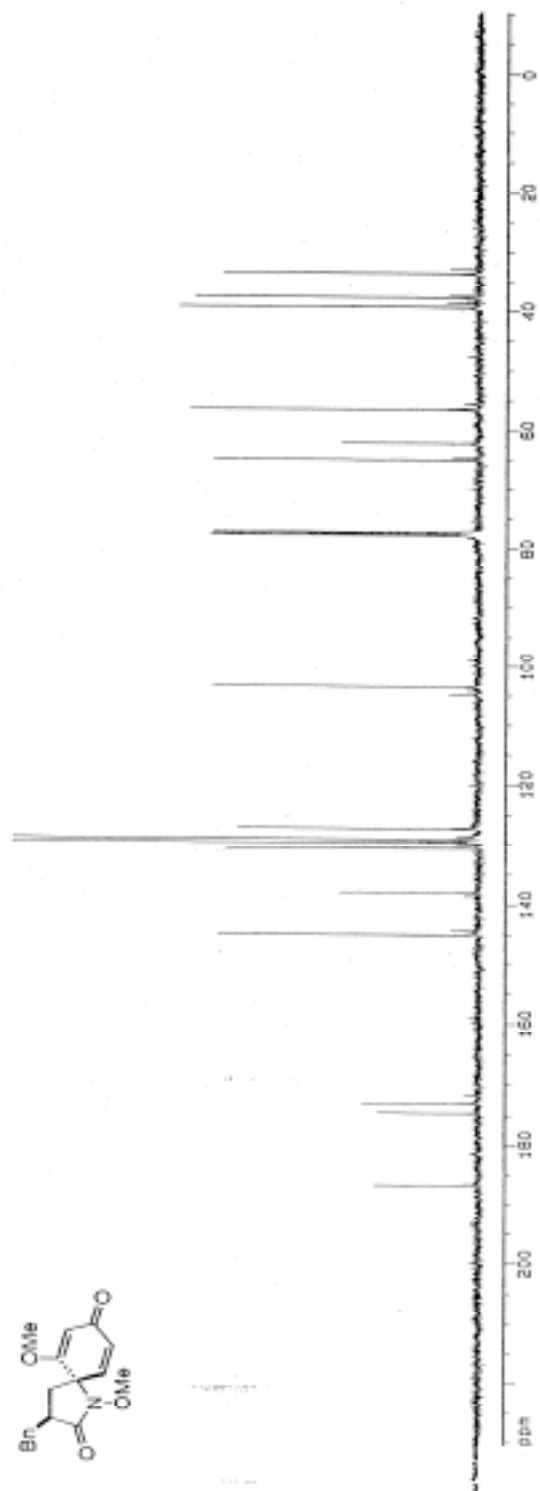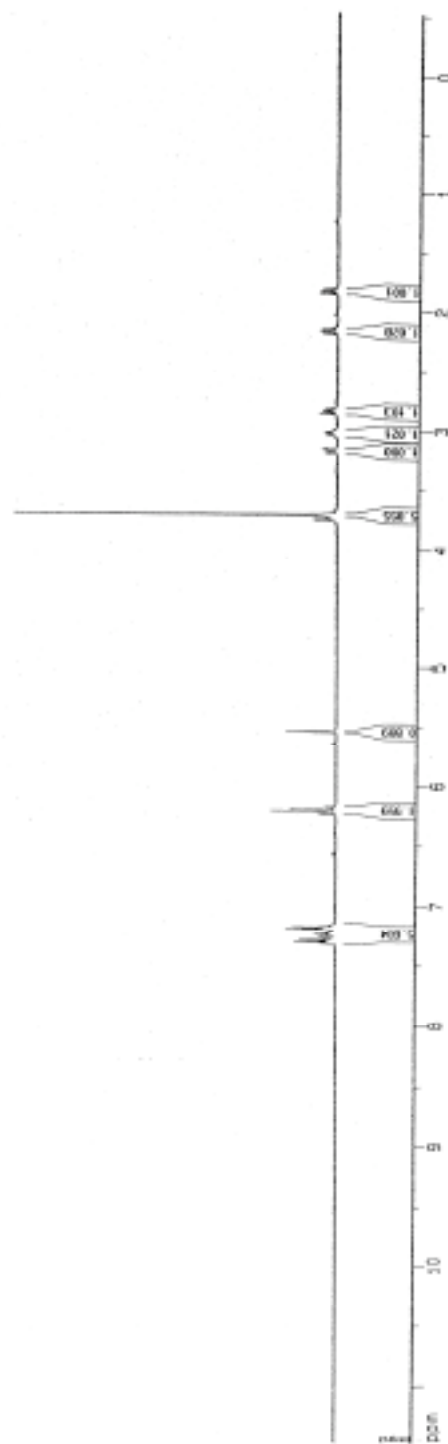

# Compound 12j

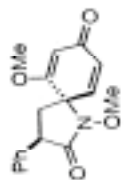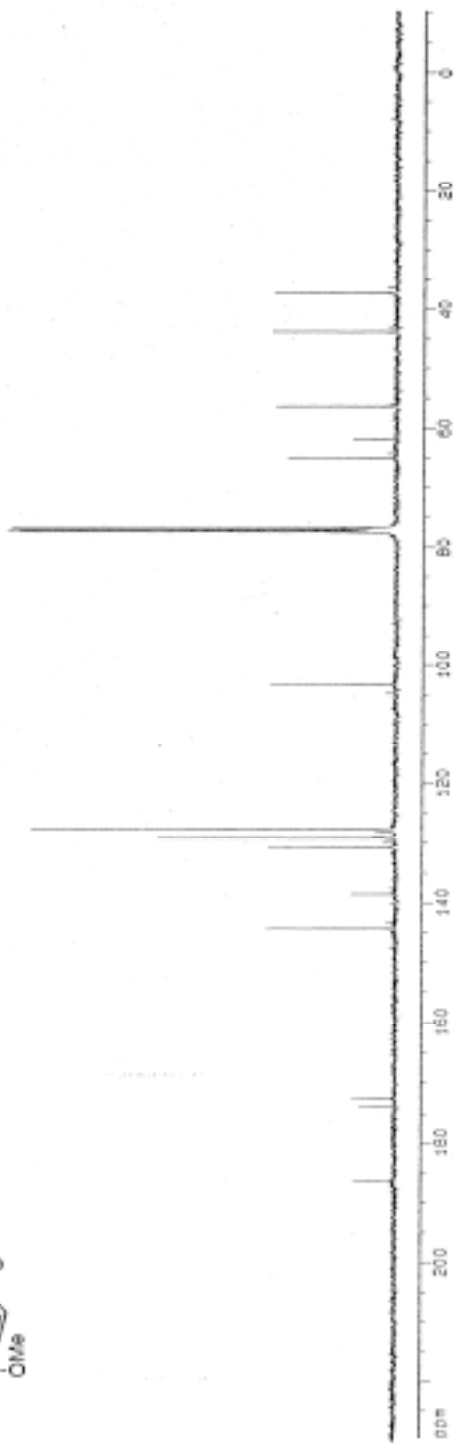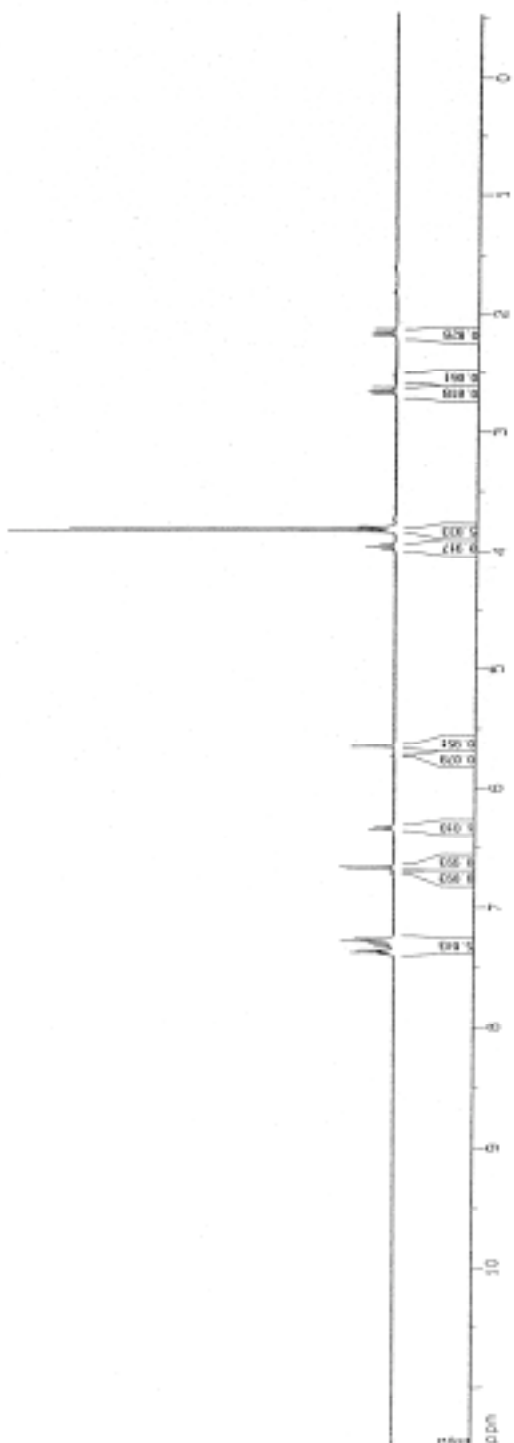



# Compound 12k

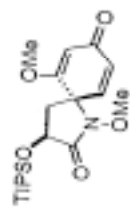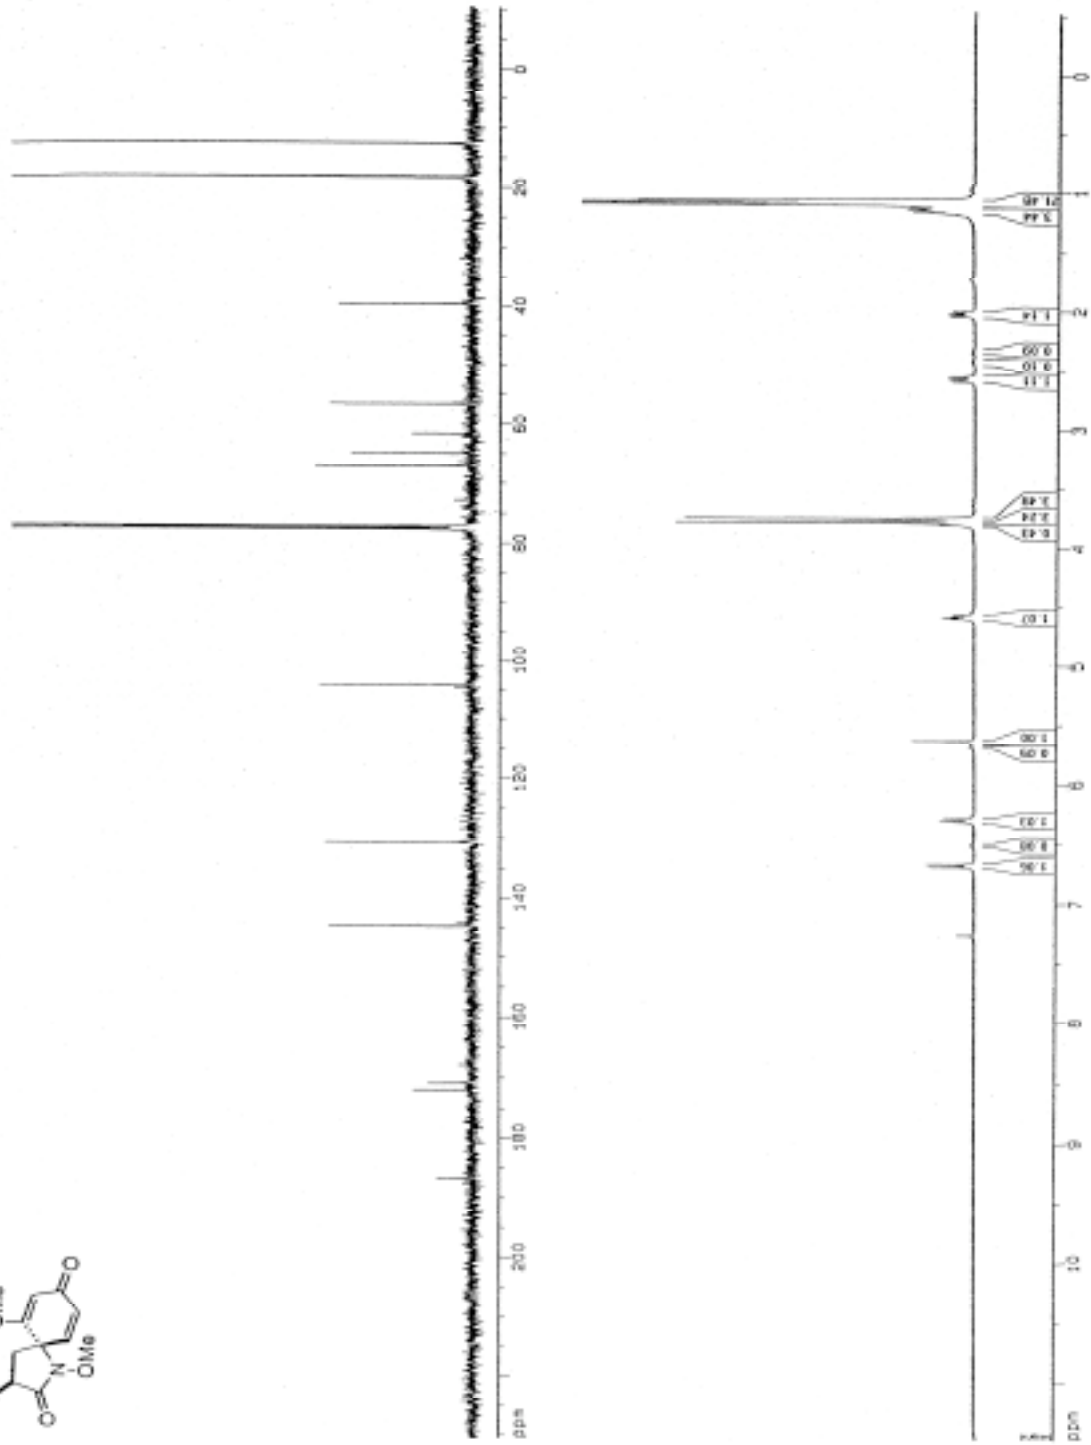

# Compound 12l

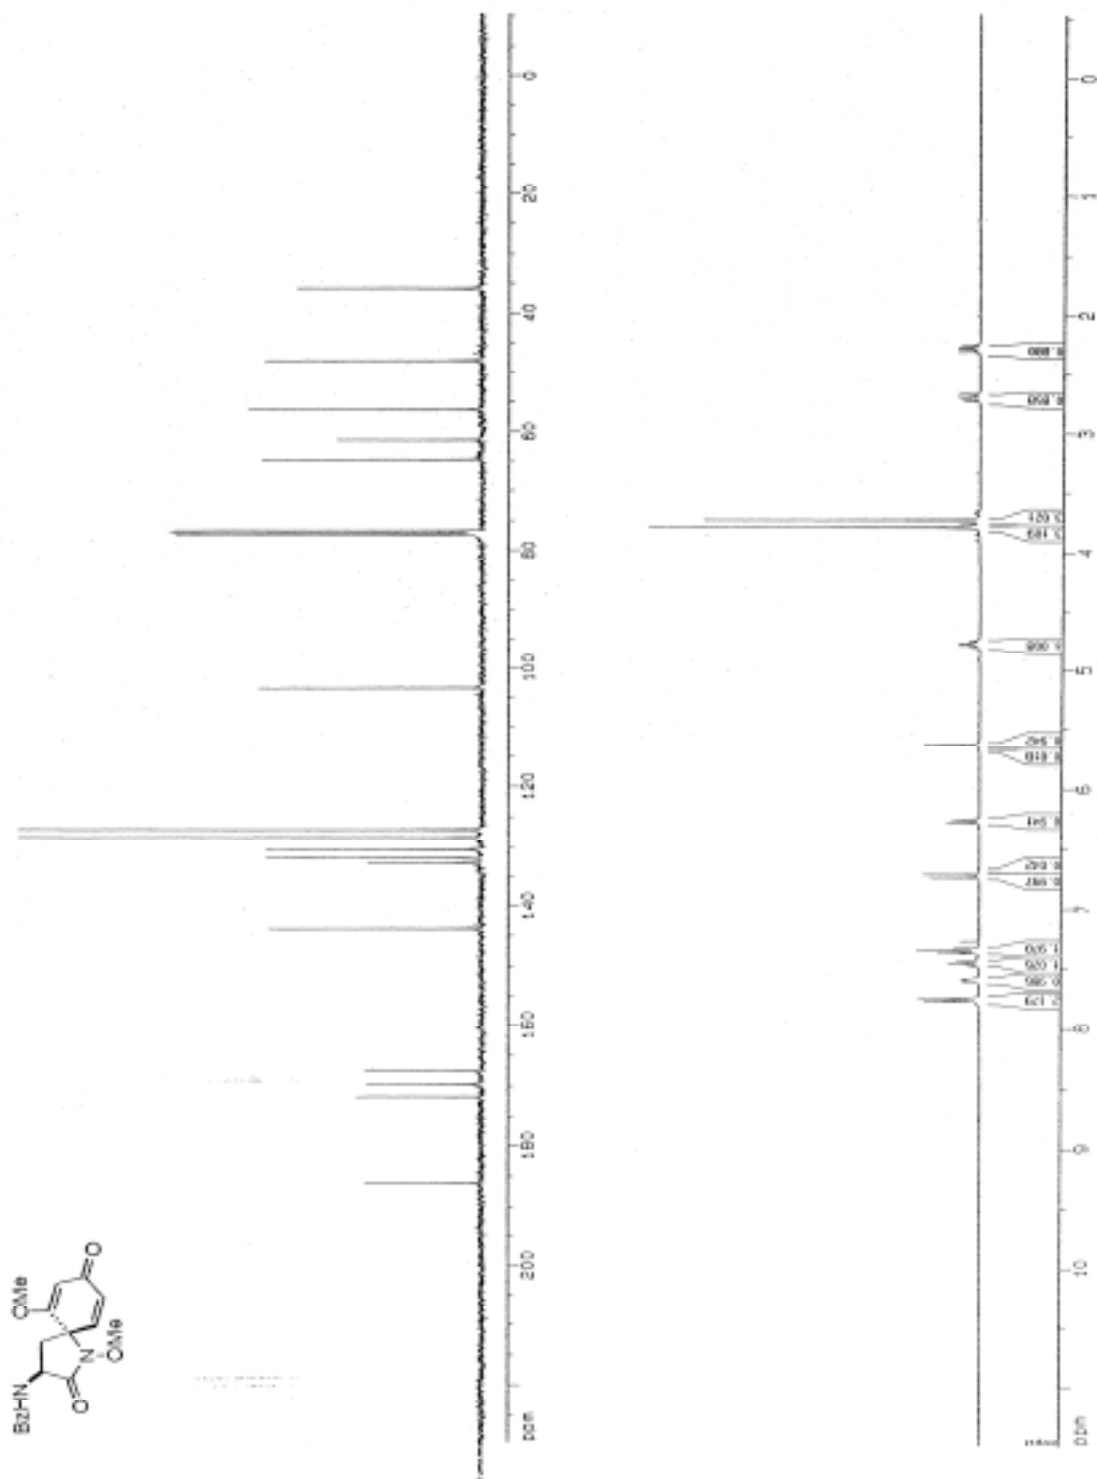

# Compound 12m

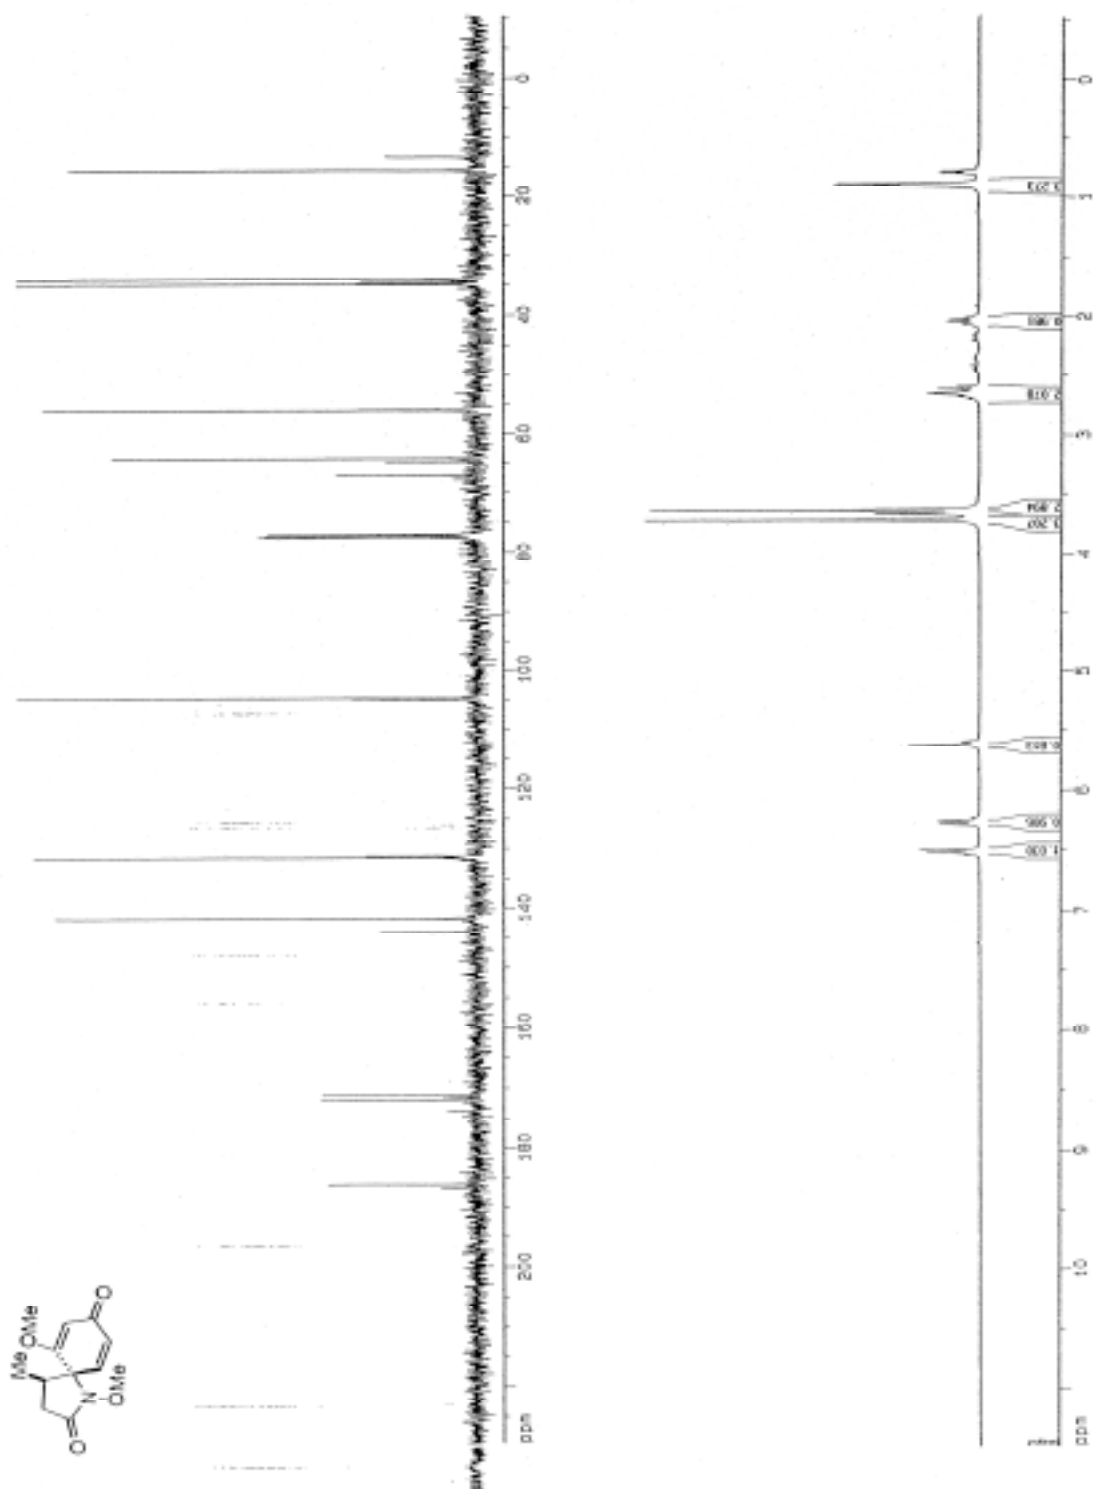

# Compound 12n

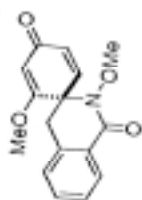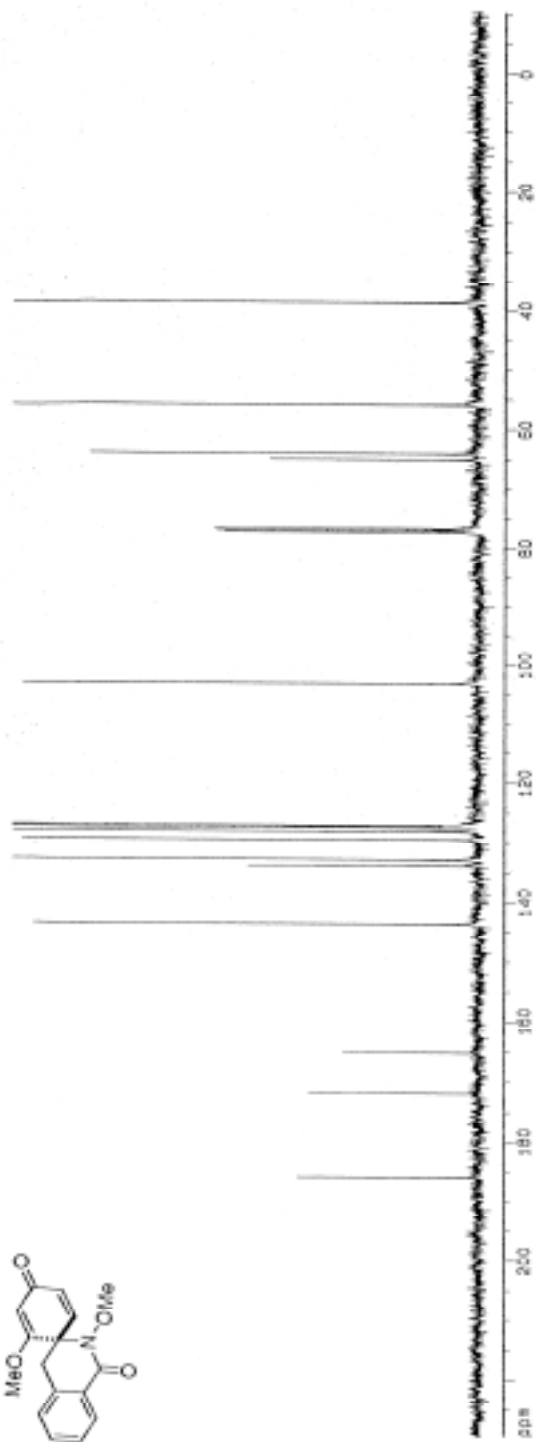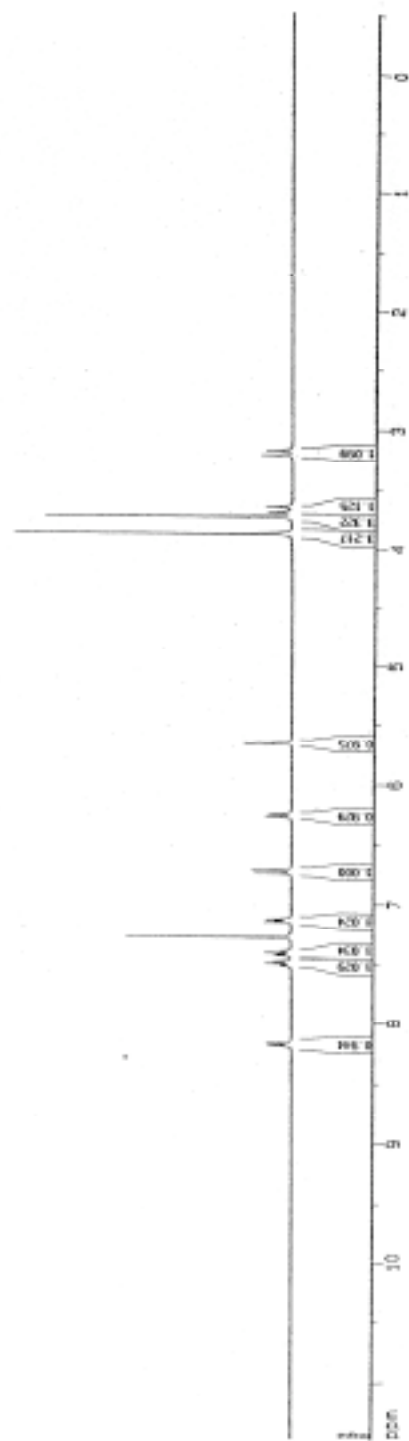

# Compound 21

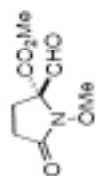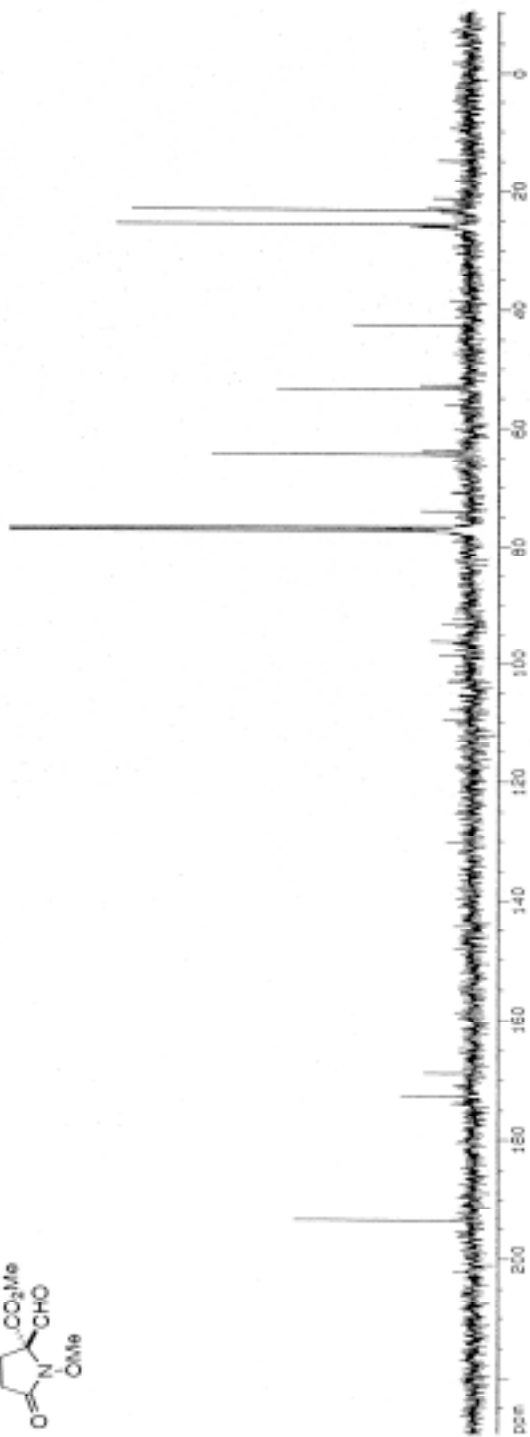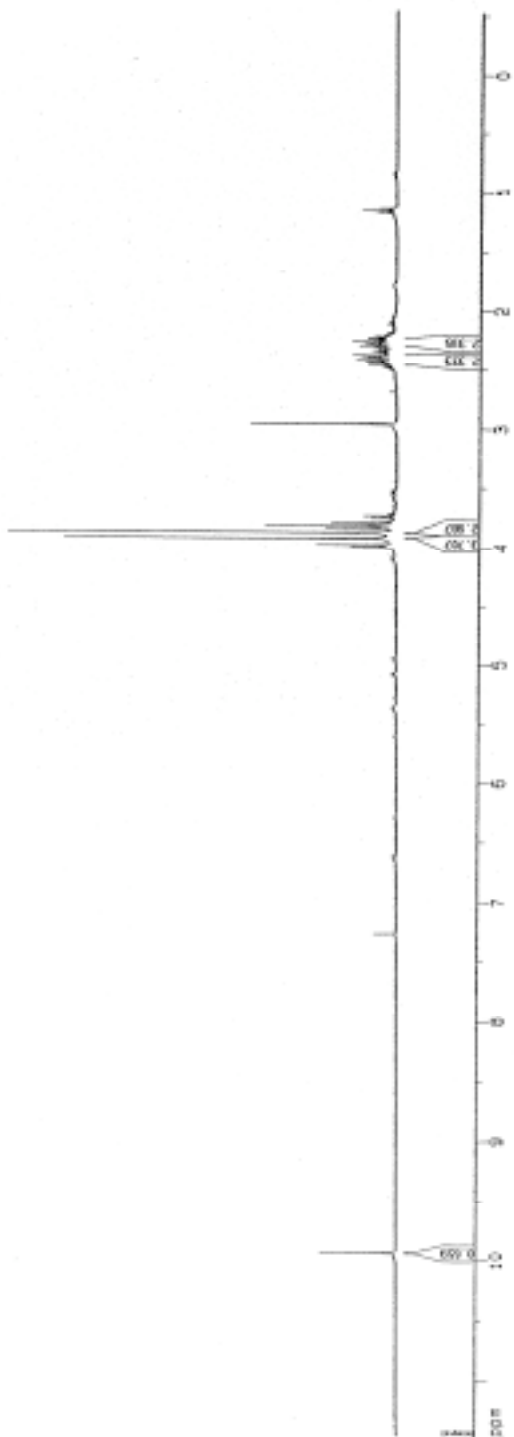

# Compound 22

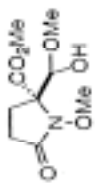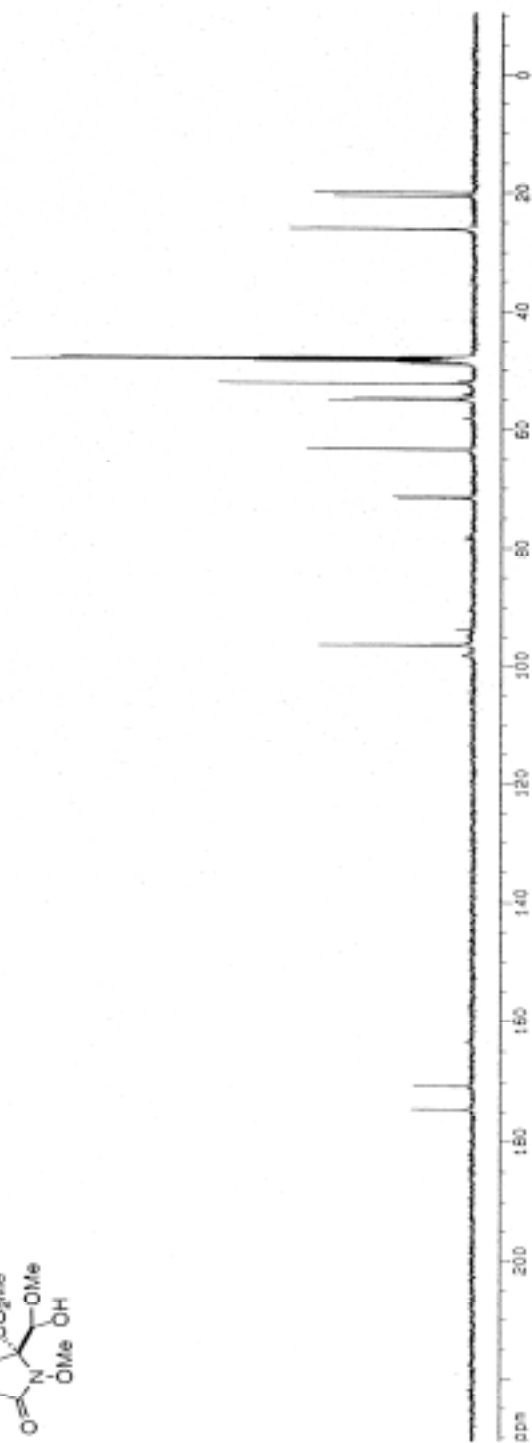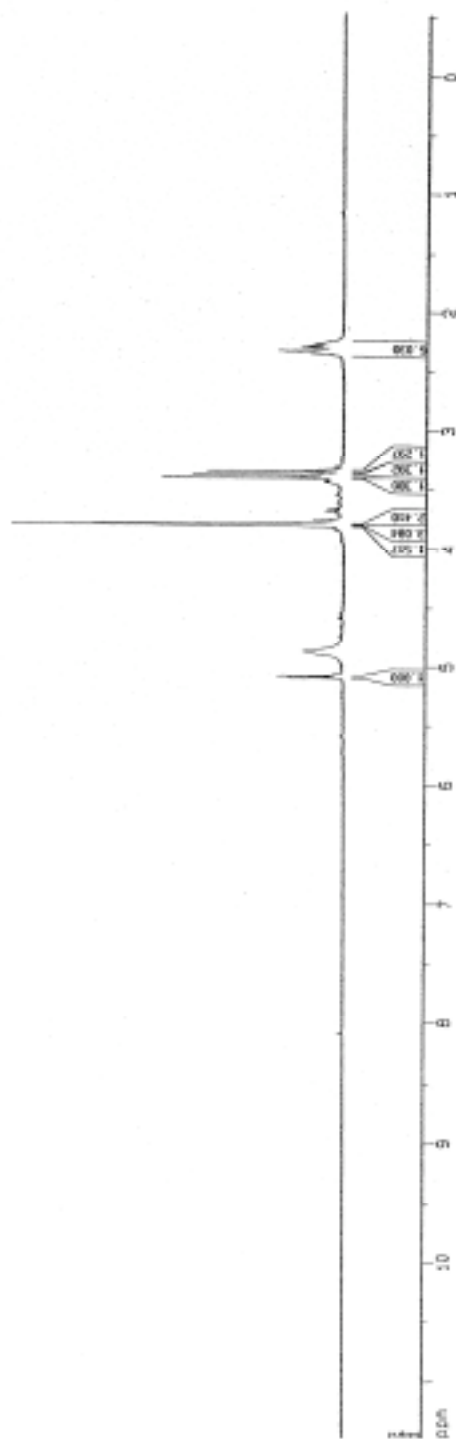

# Compound 23

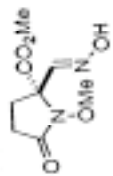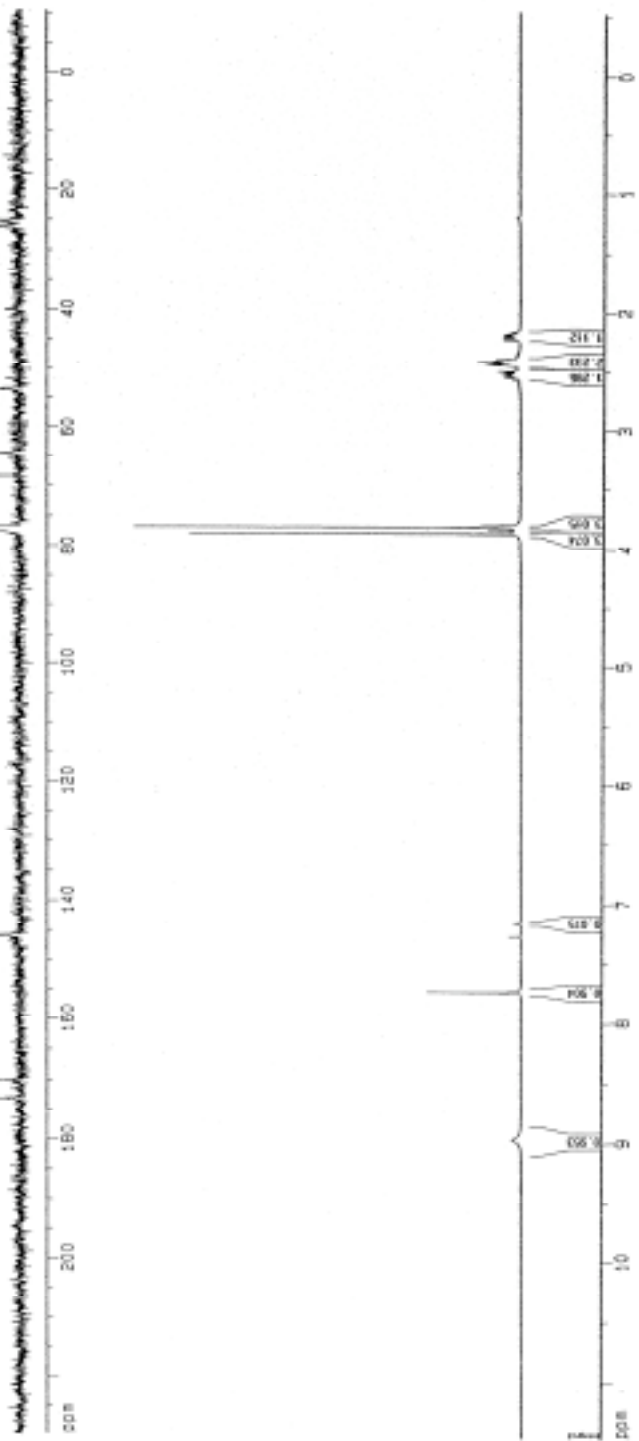

# Compound 24

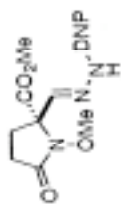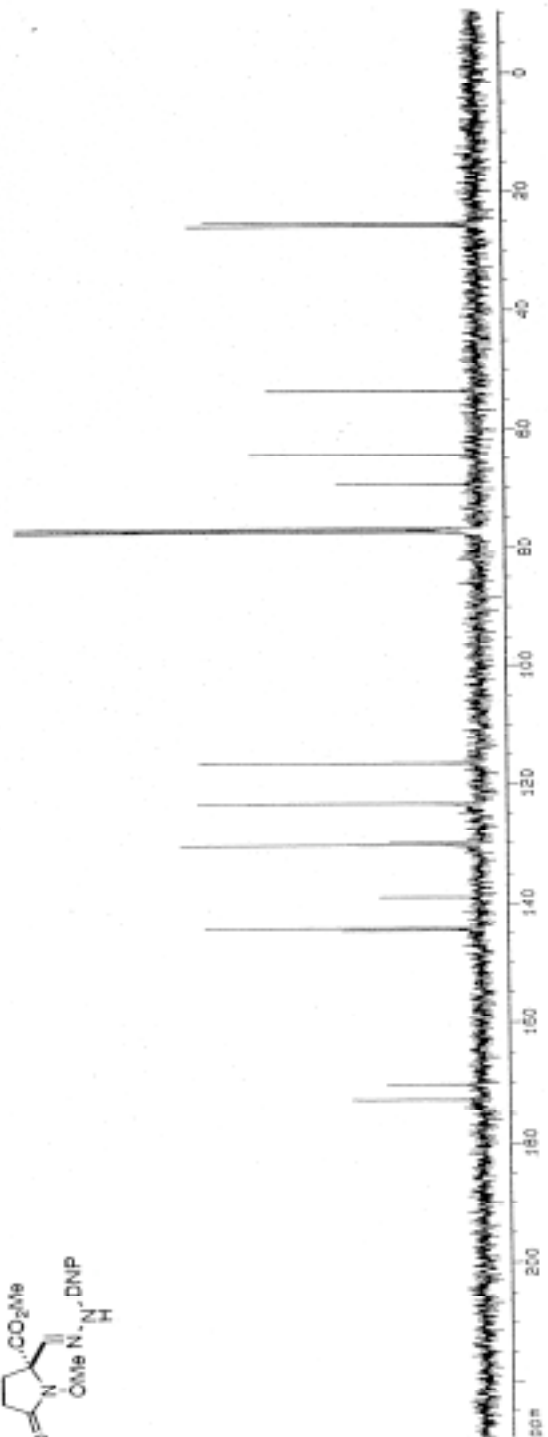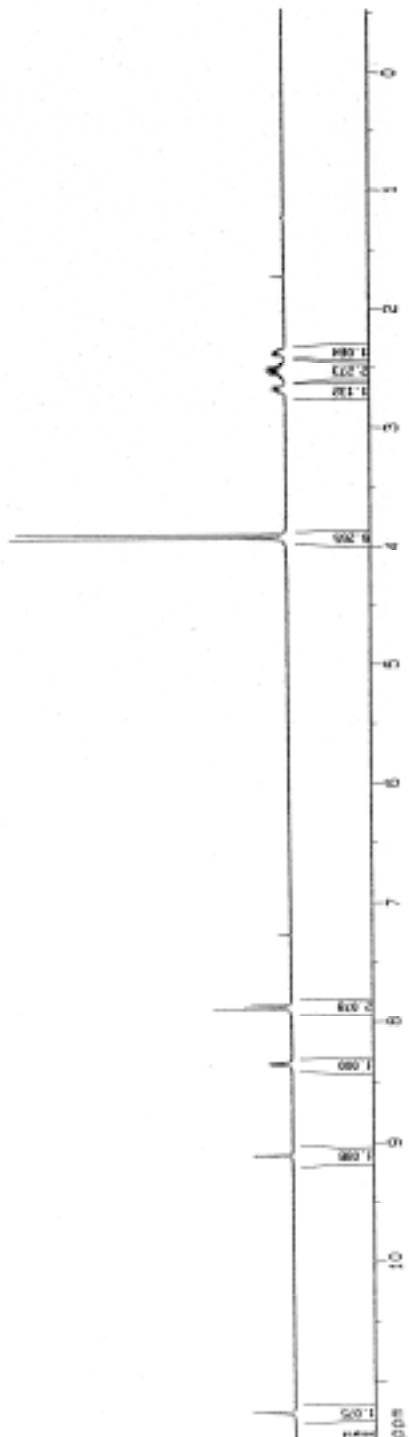



# Compound 26

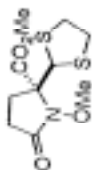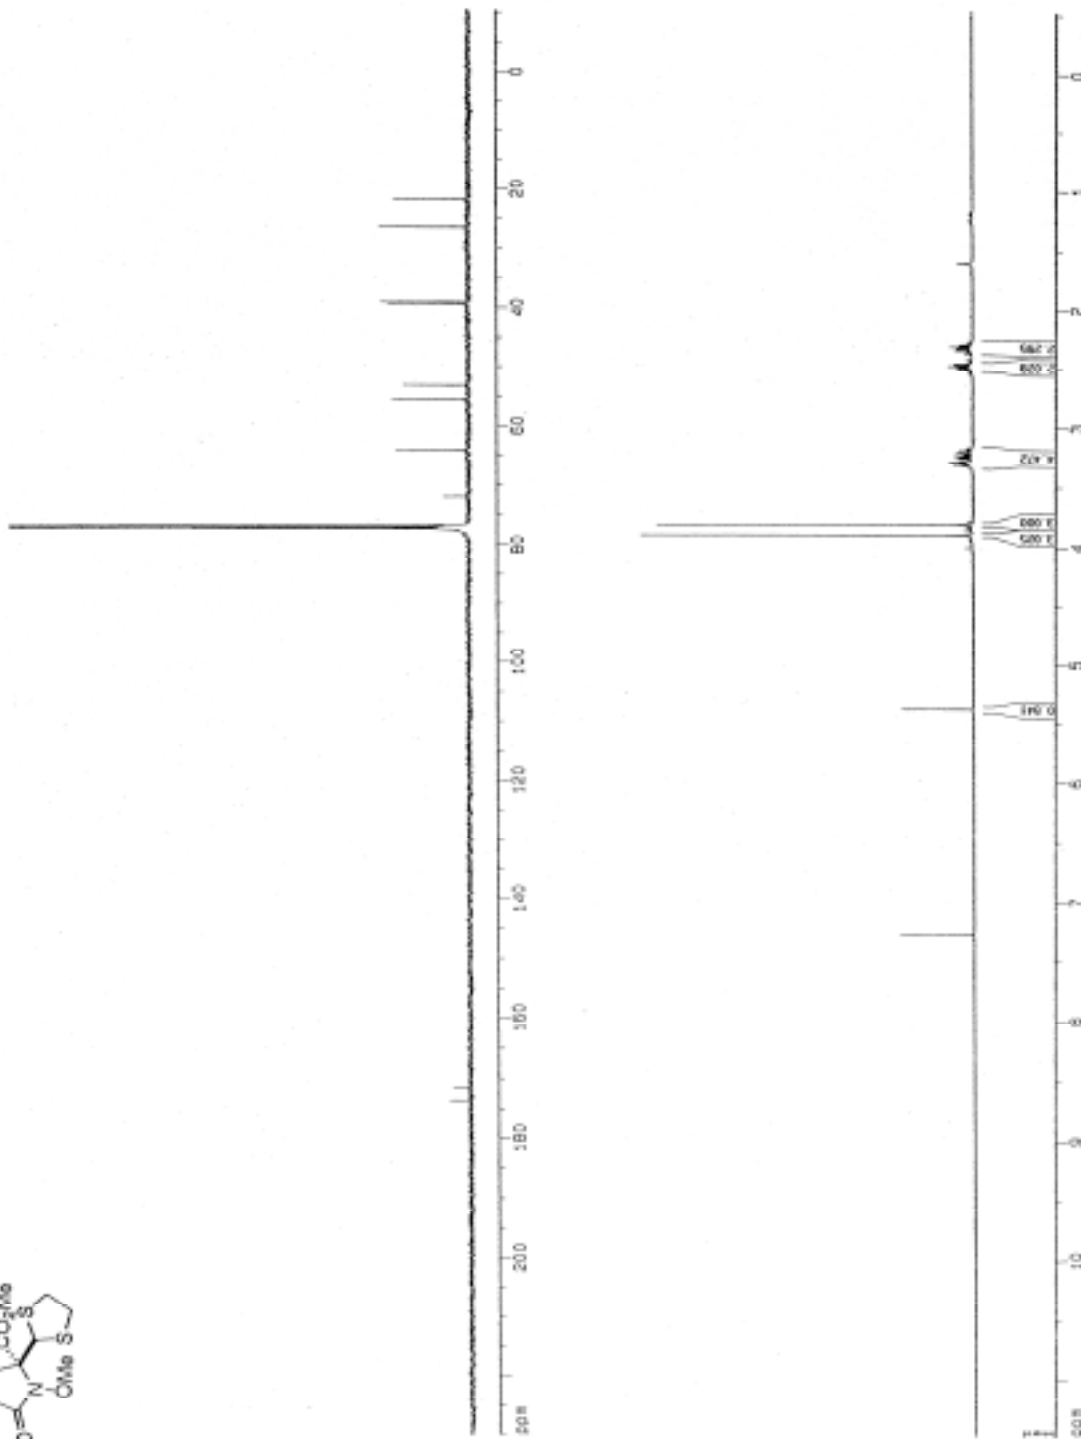

Compound 27

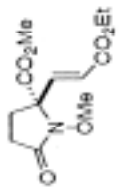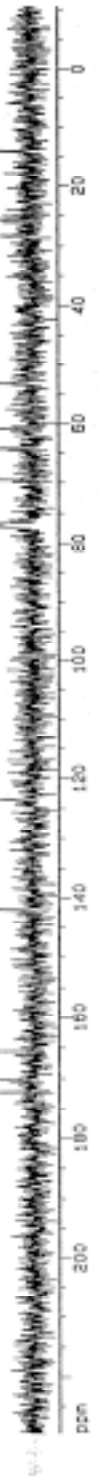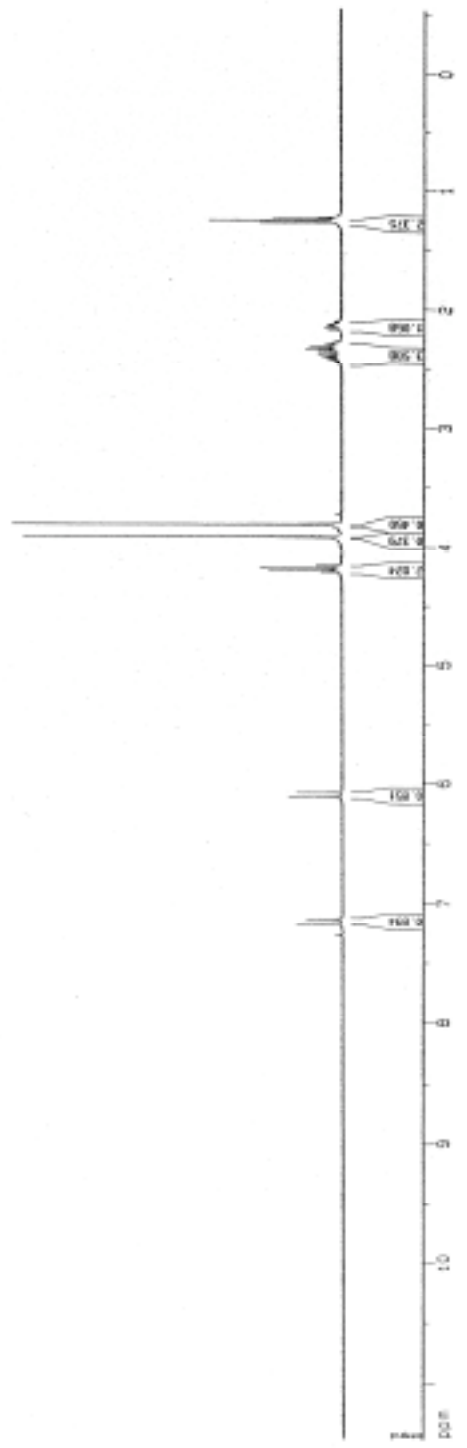

# Compound 29

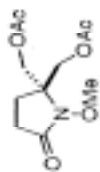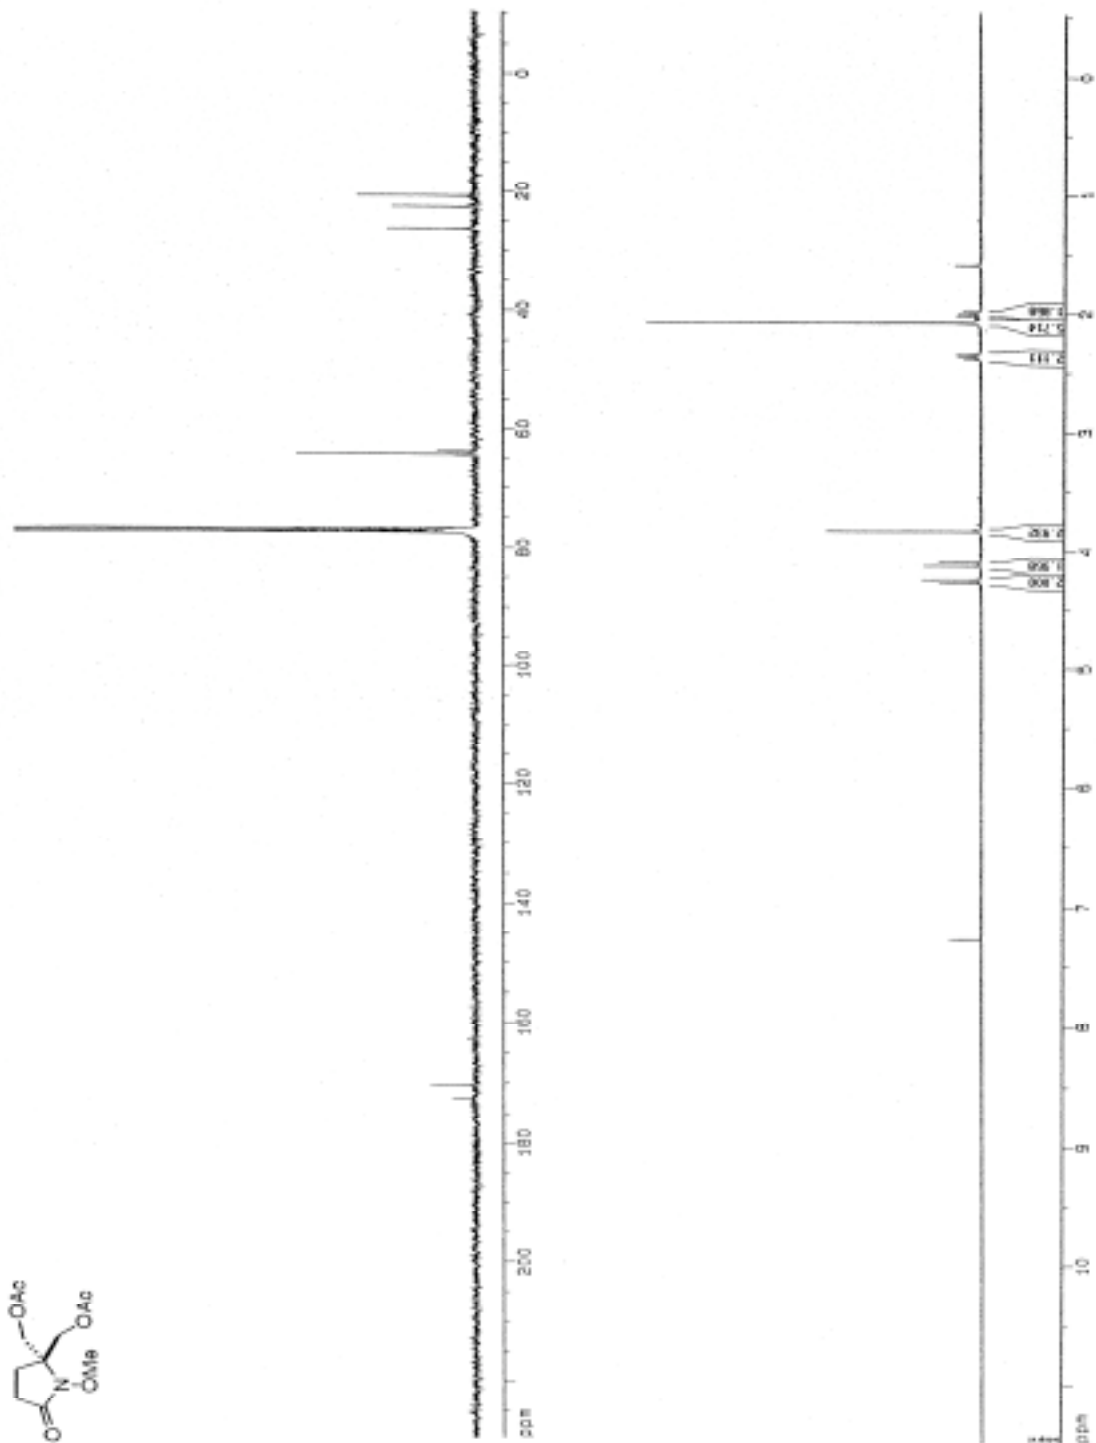

# Compound 30a

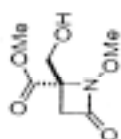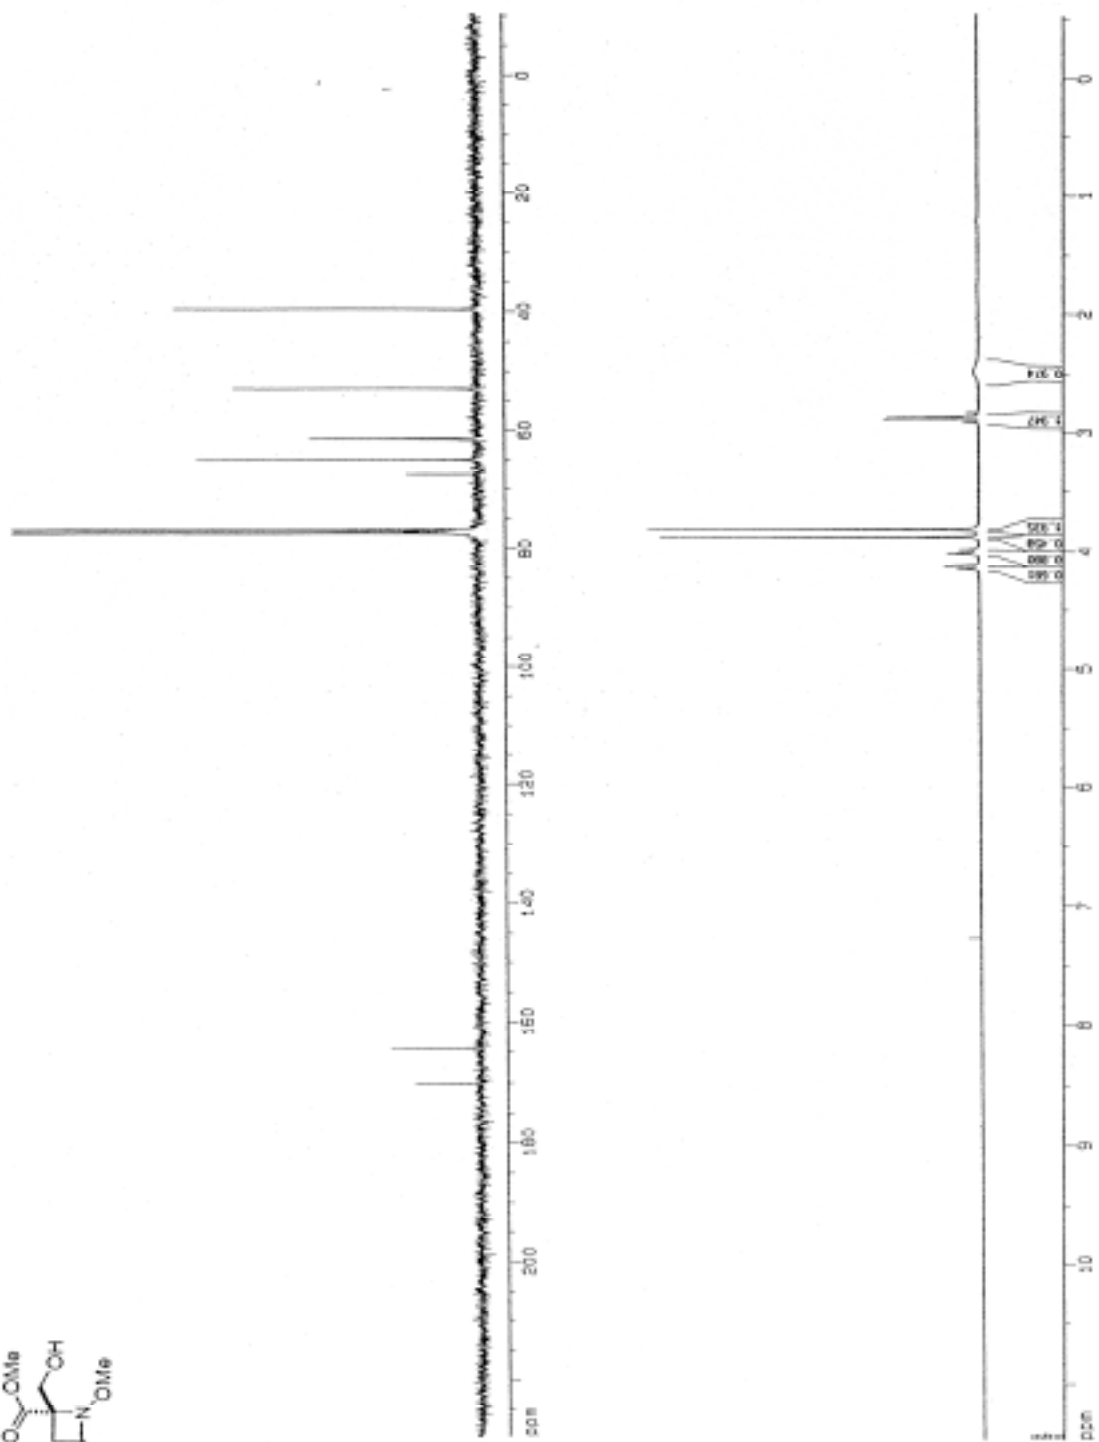

# Compound 30b

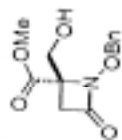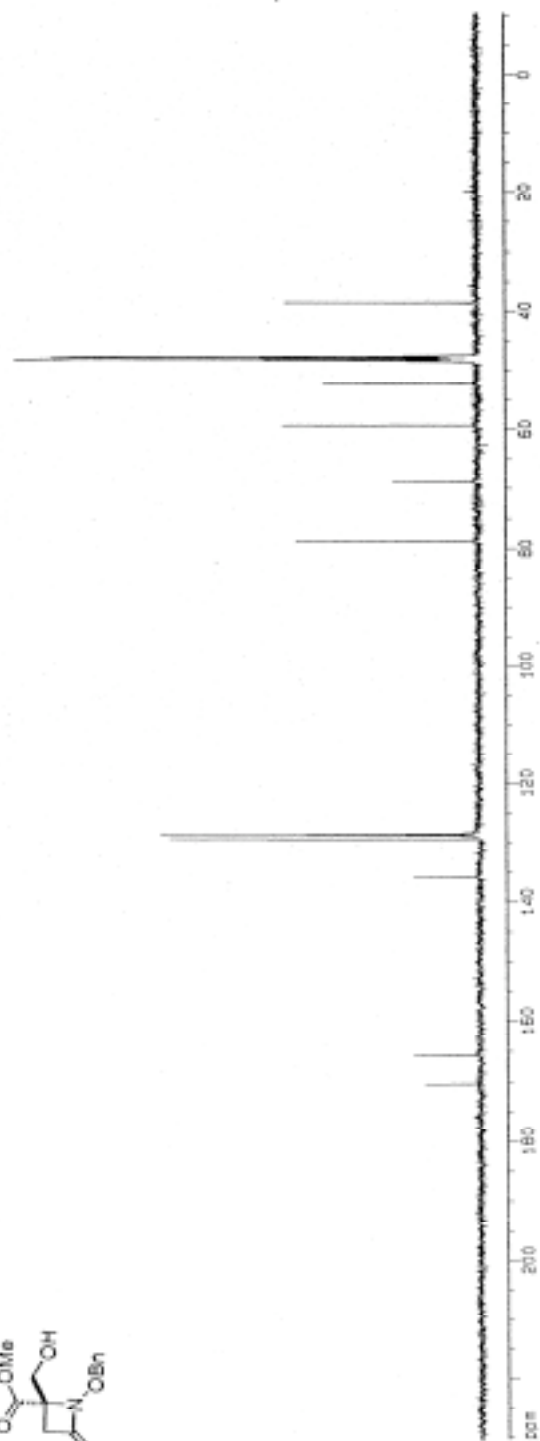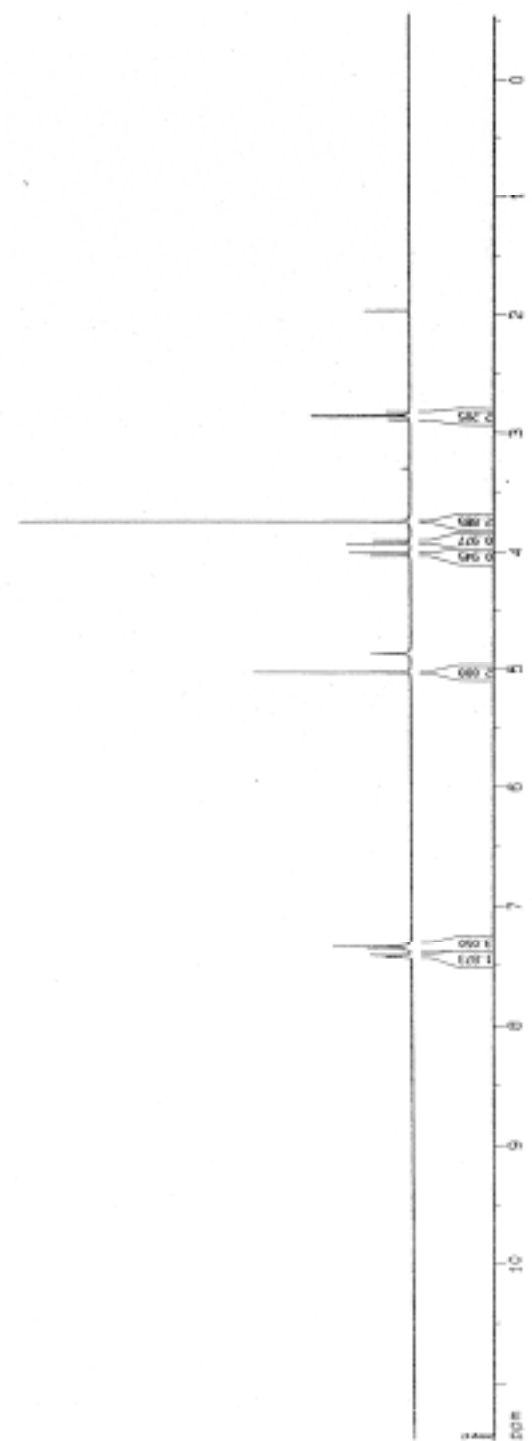

# Compound 30c

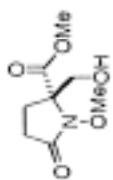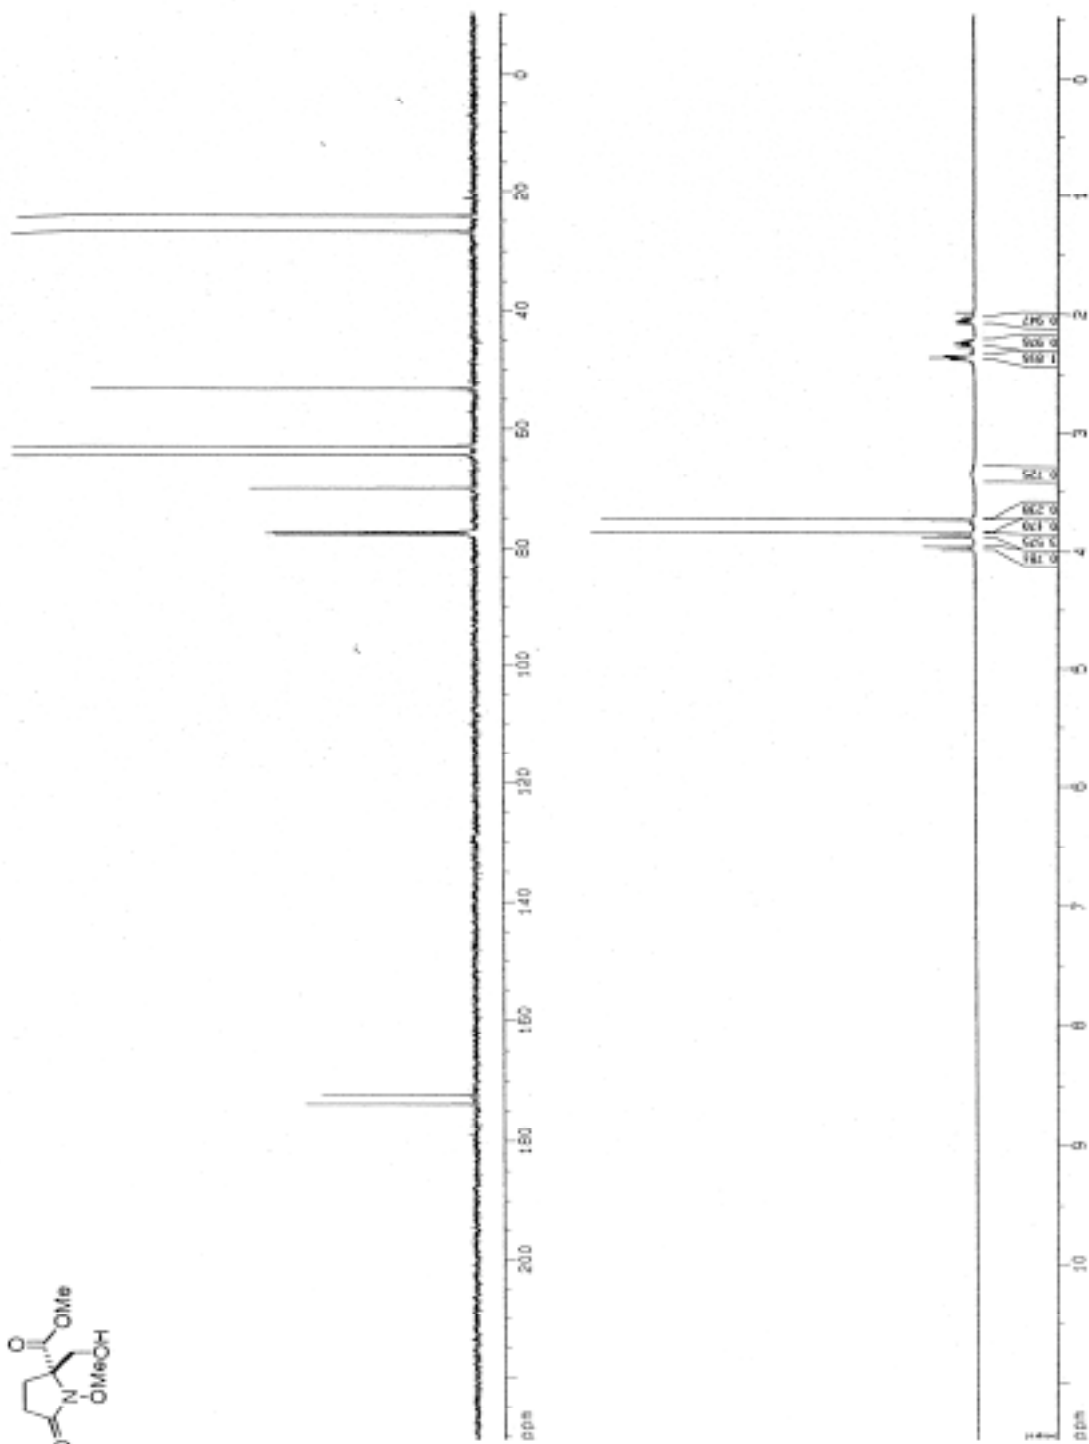

# Compound 30d

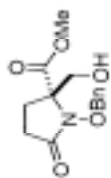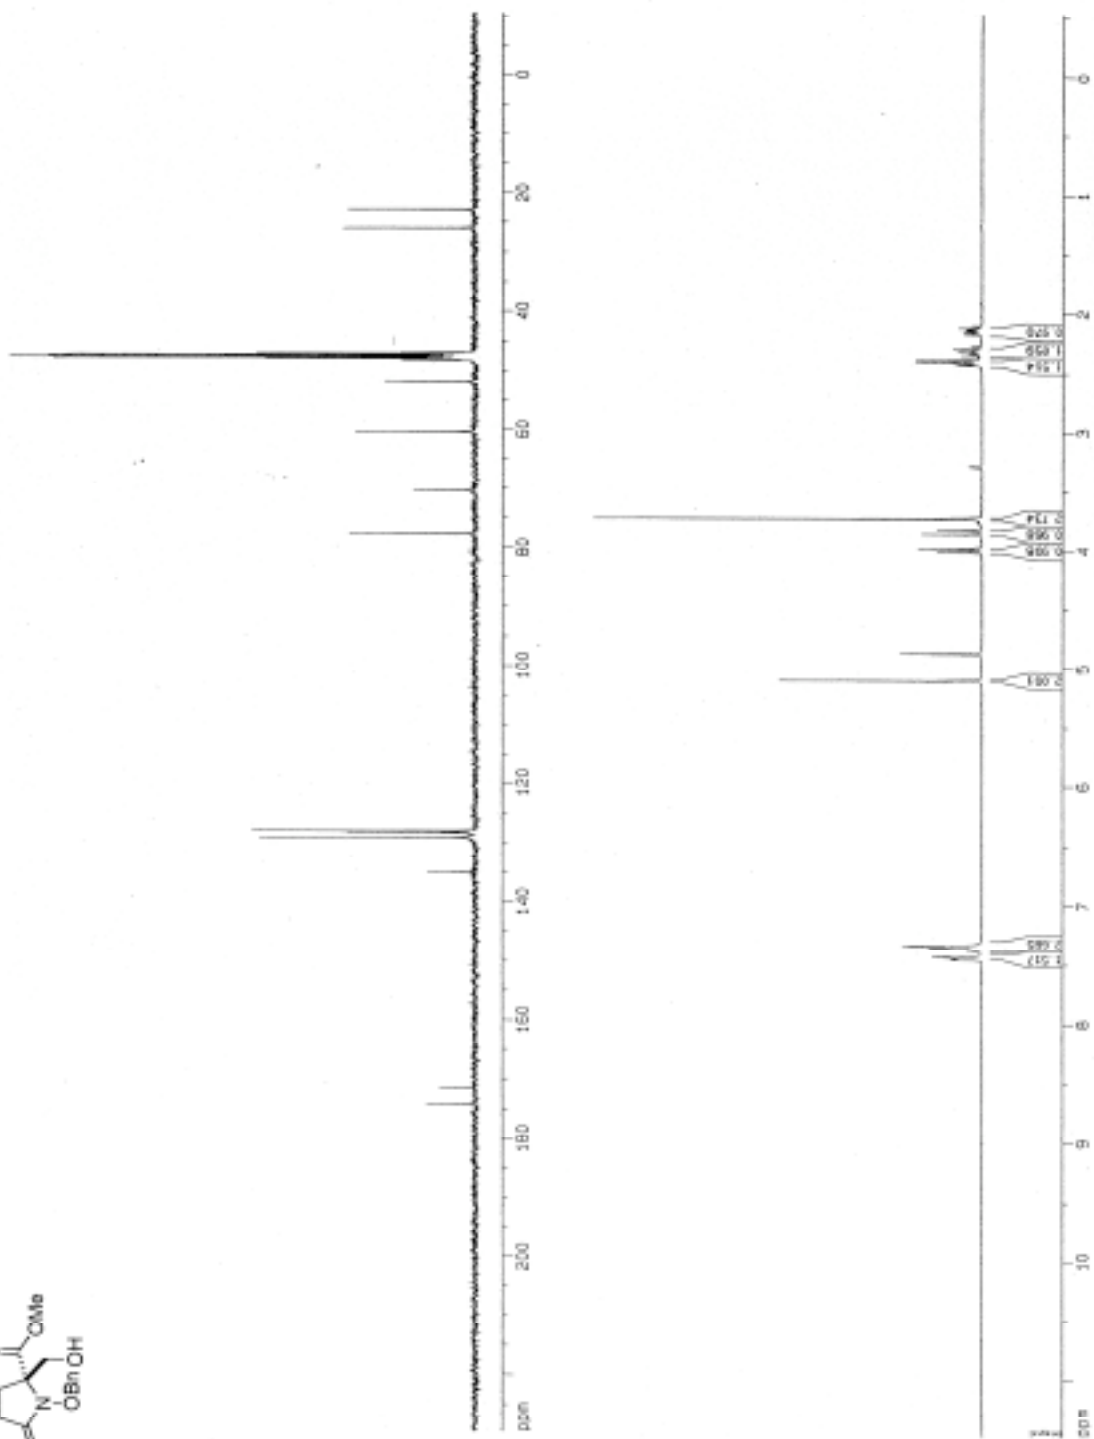

# Compound 30e

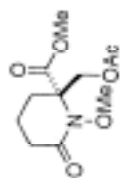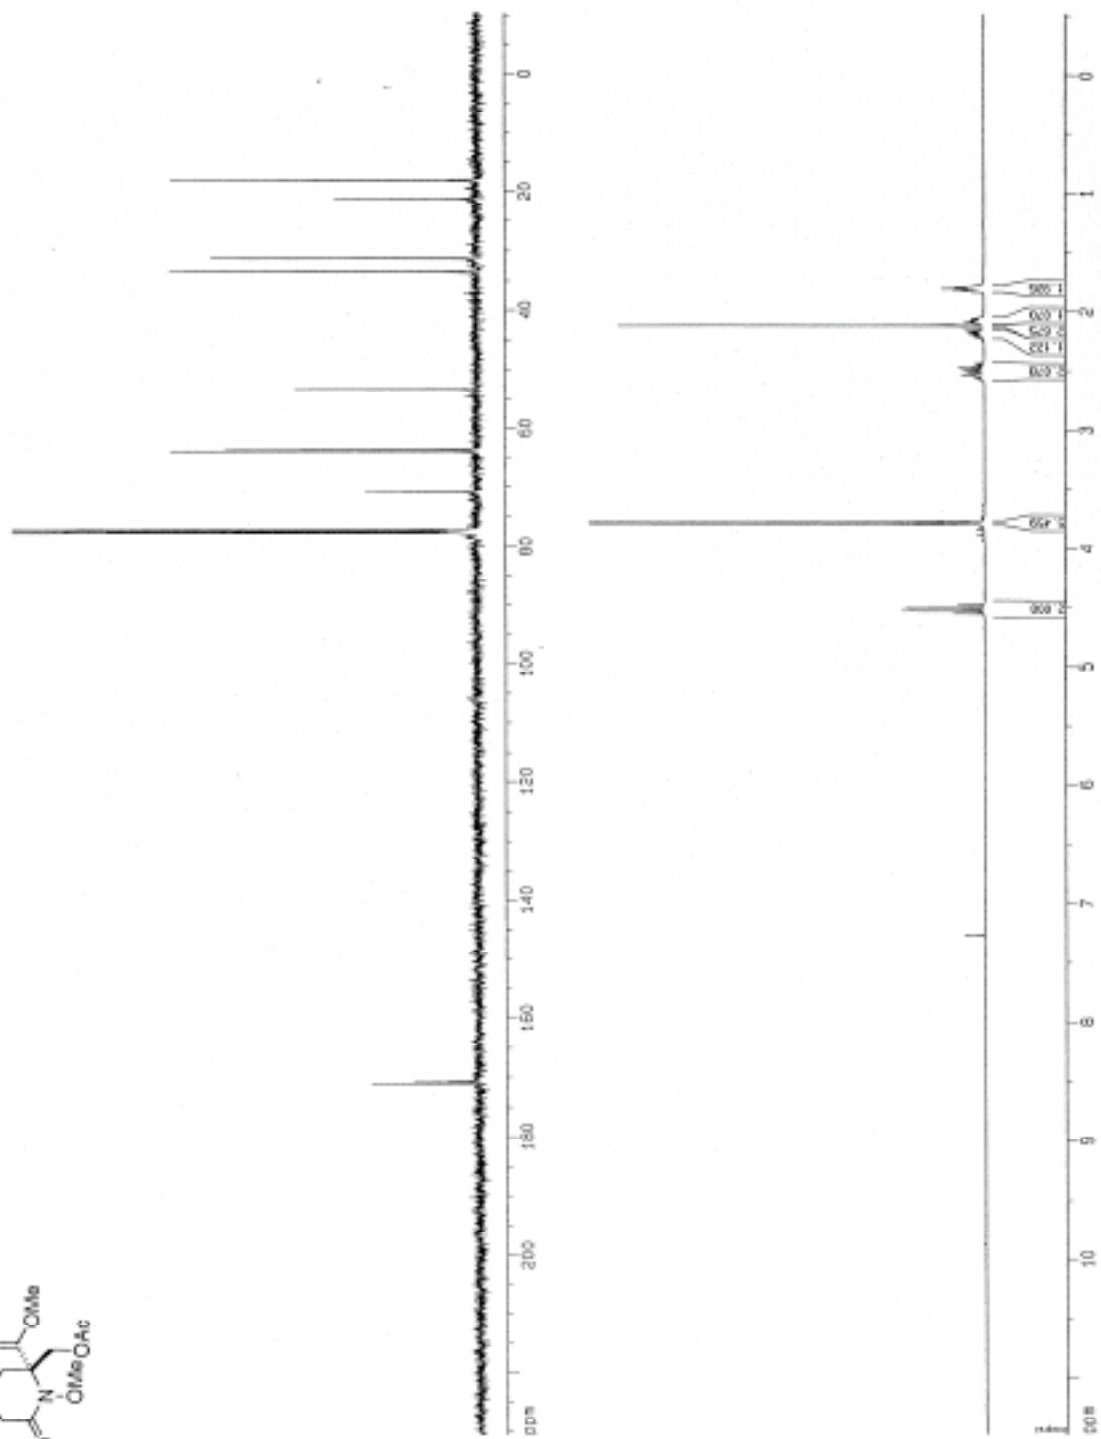



# Compound 30f

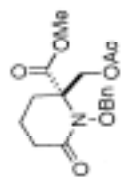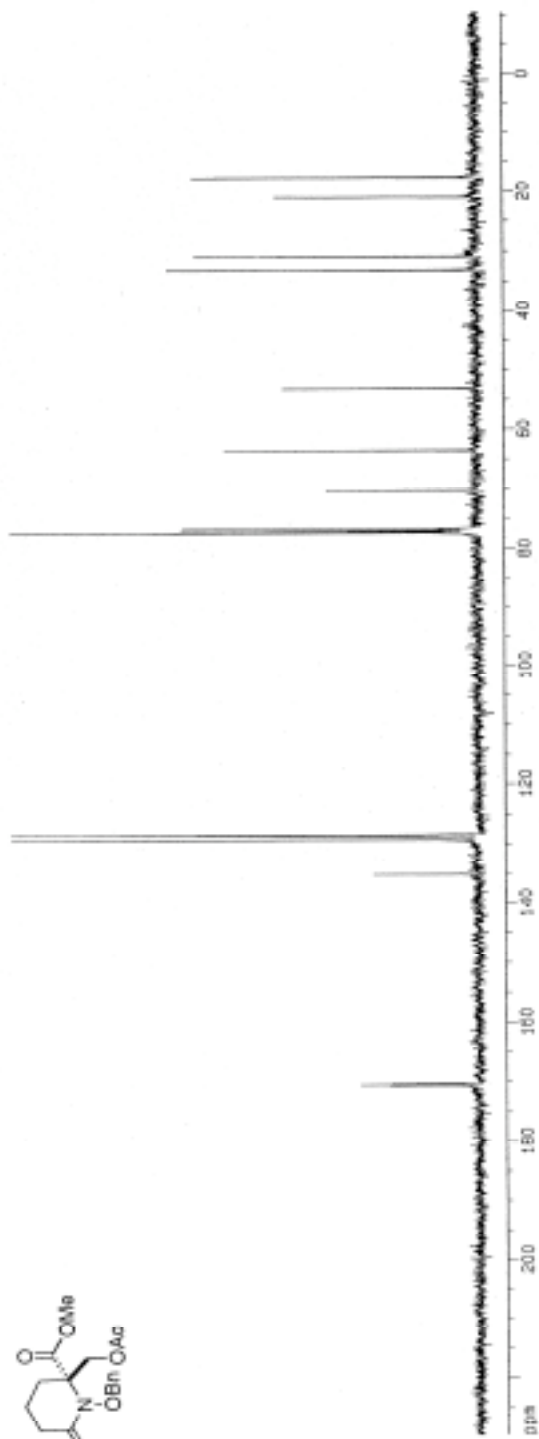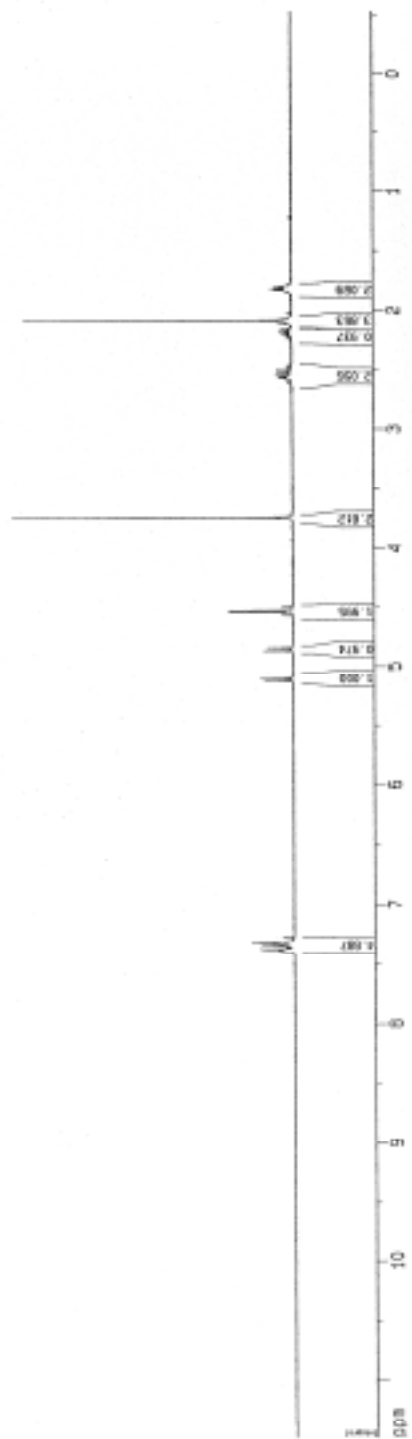

# Compound 30g

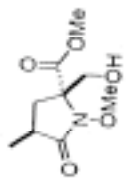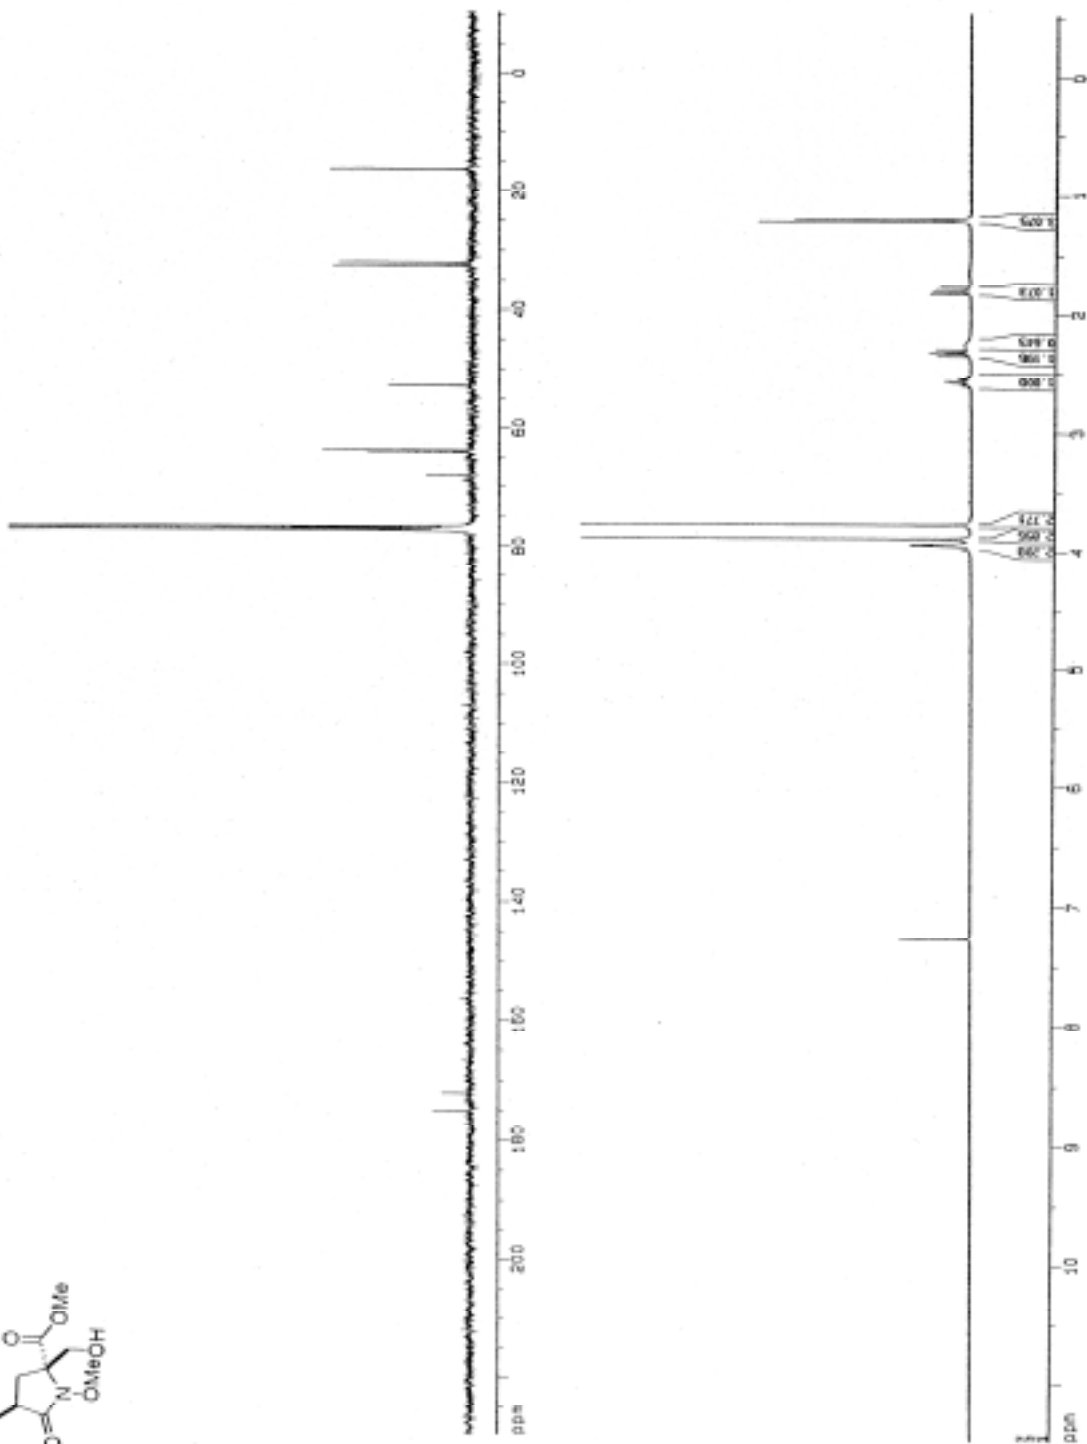

# Compound 30h

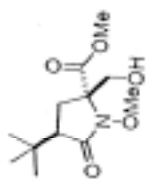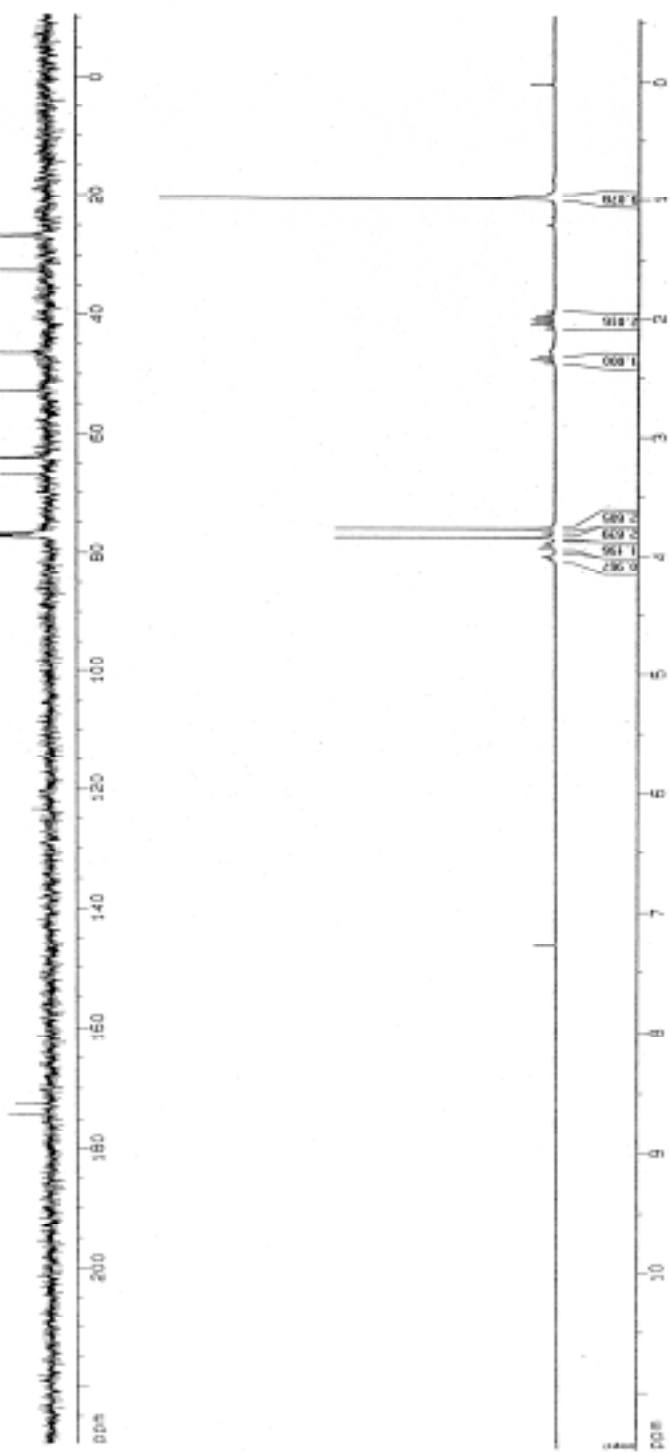

Compound 30i

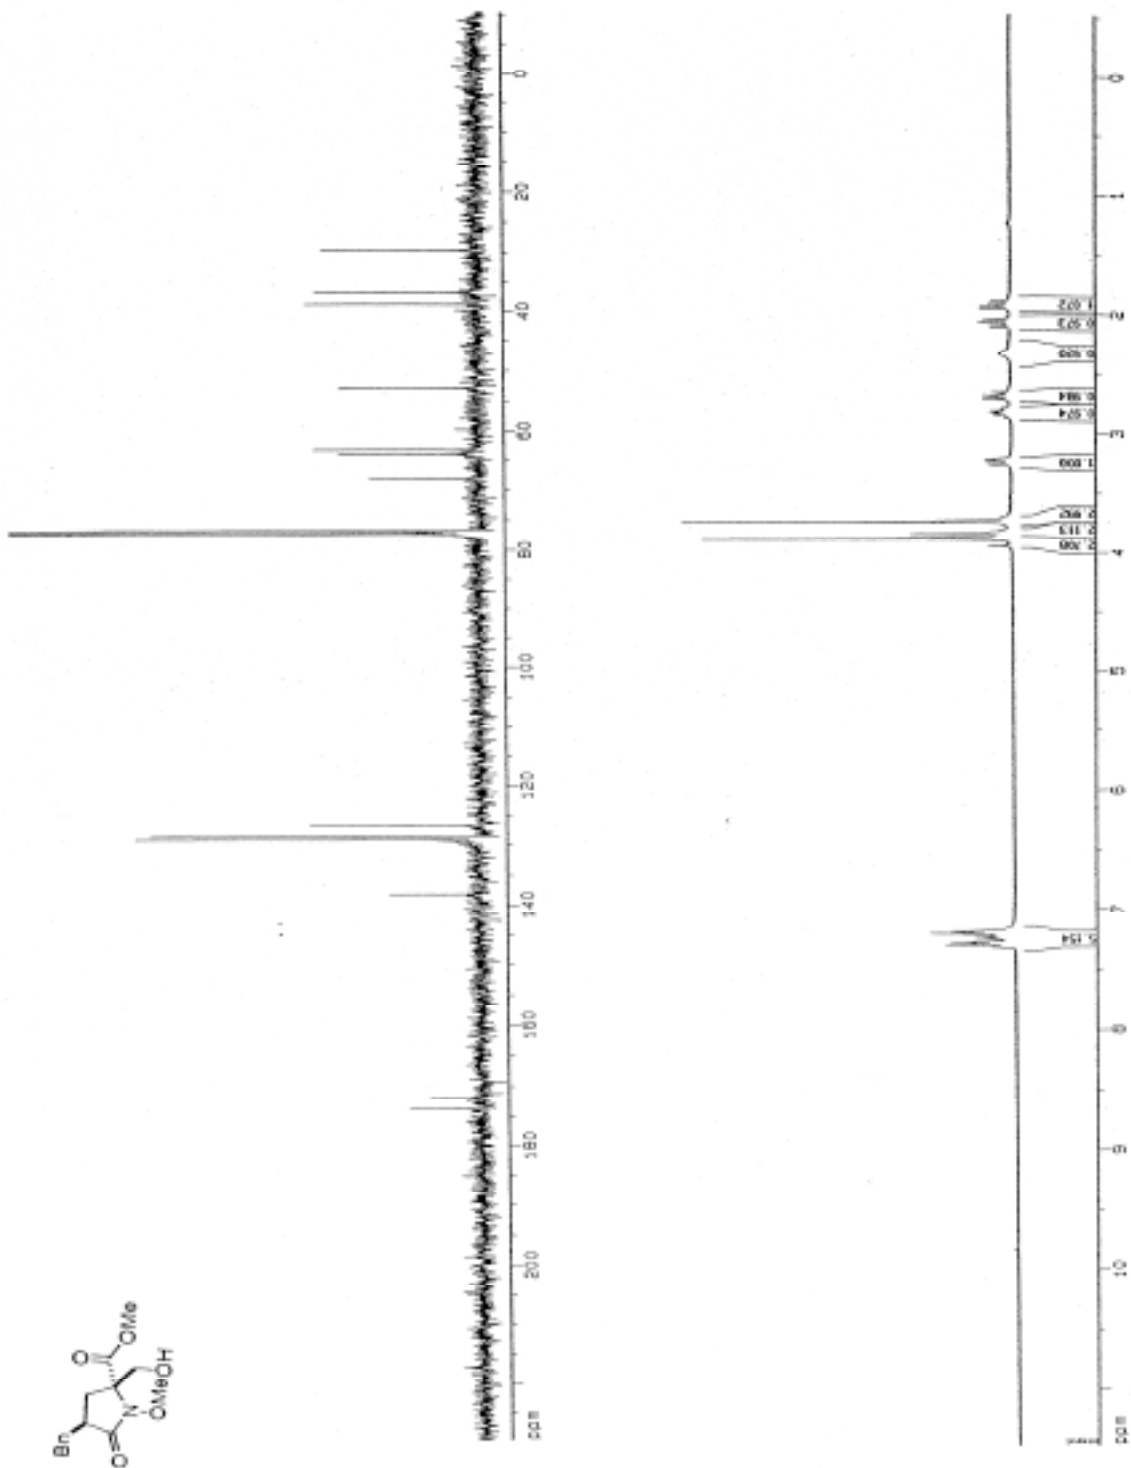

# Compound 30j

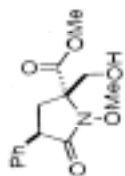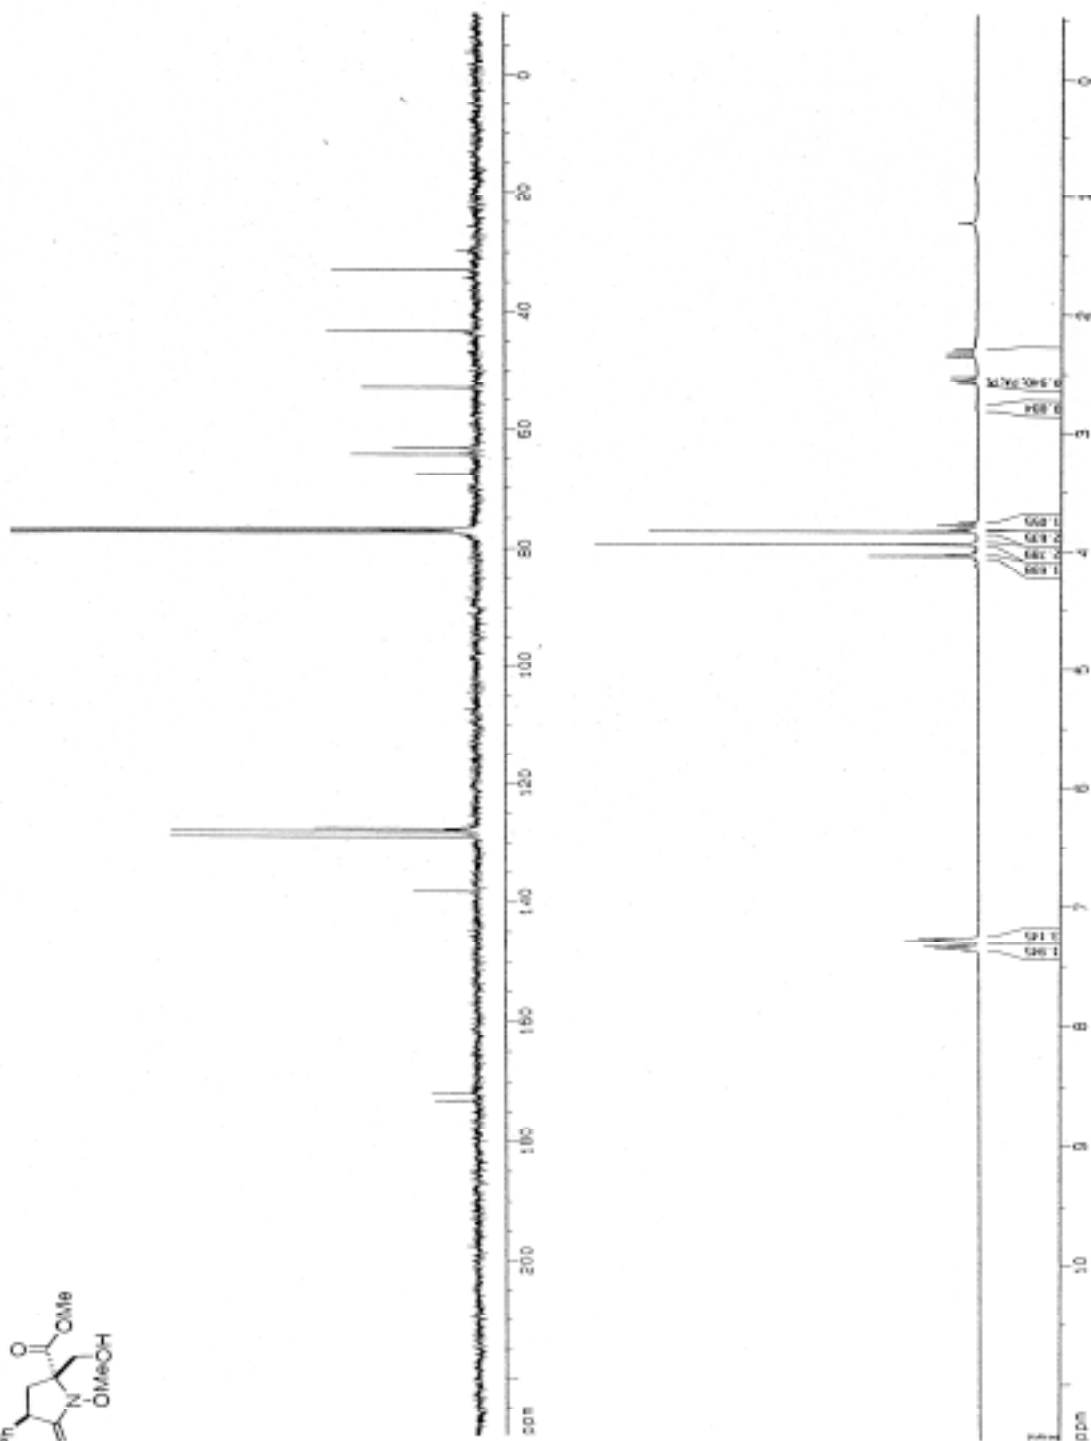

# Compound 30k

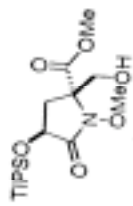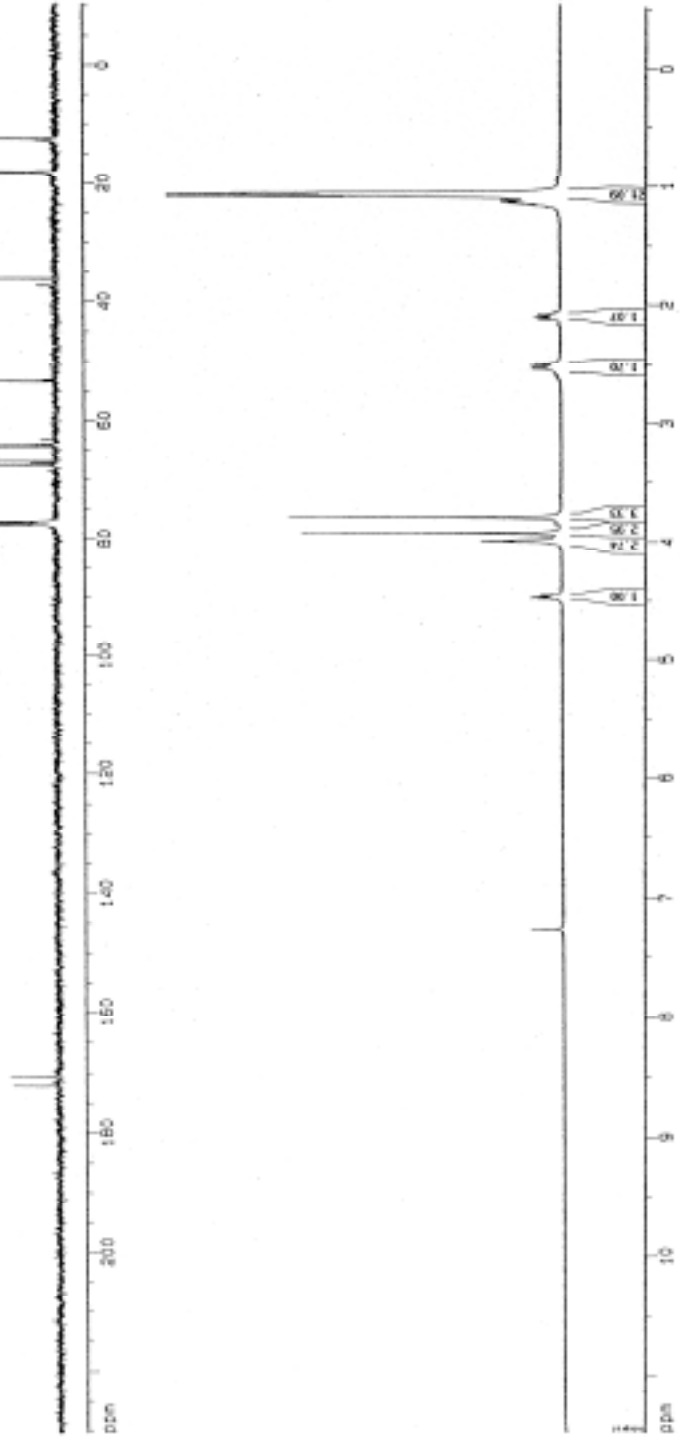

Compound 30l

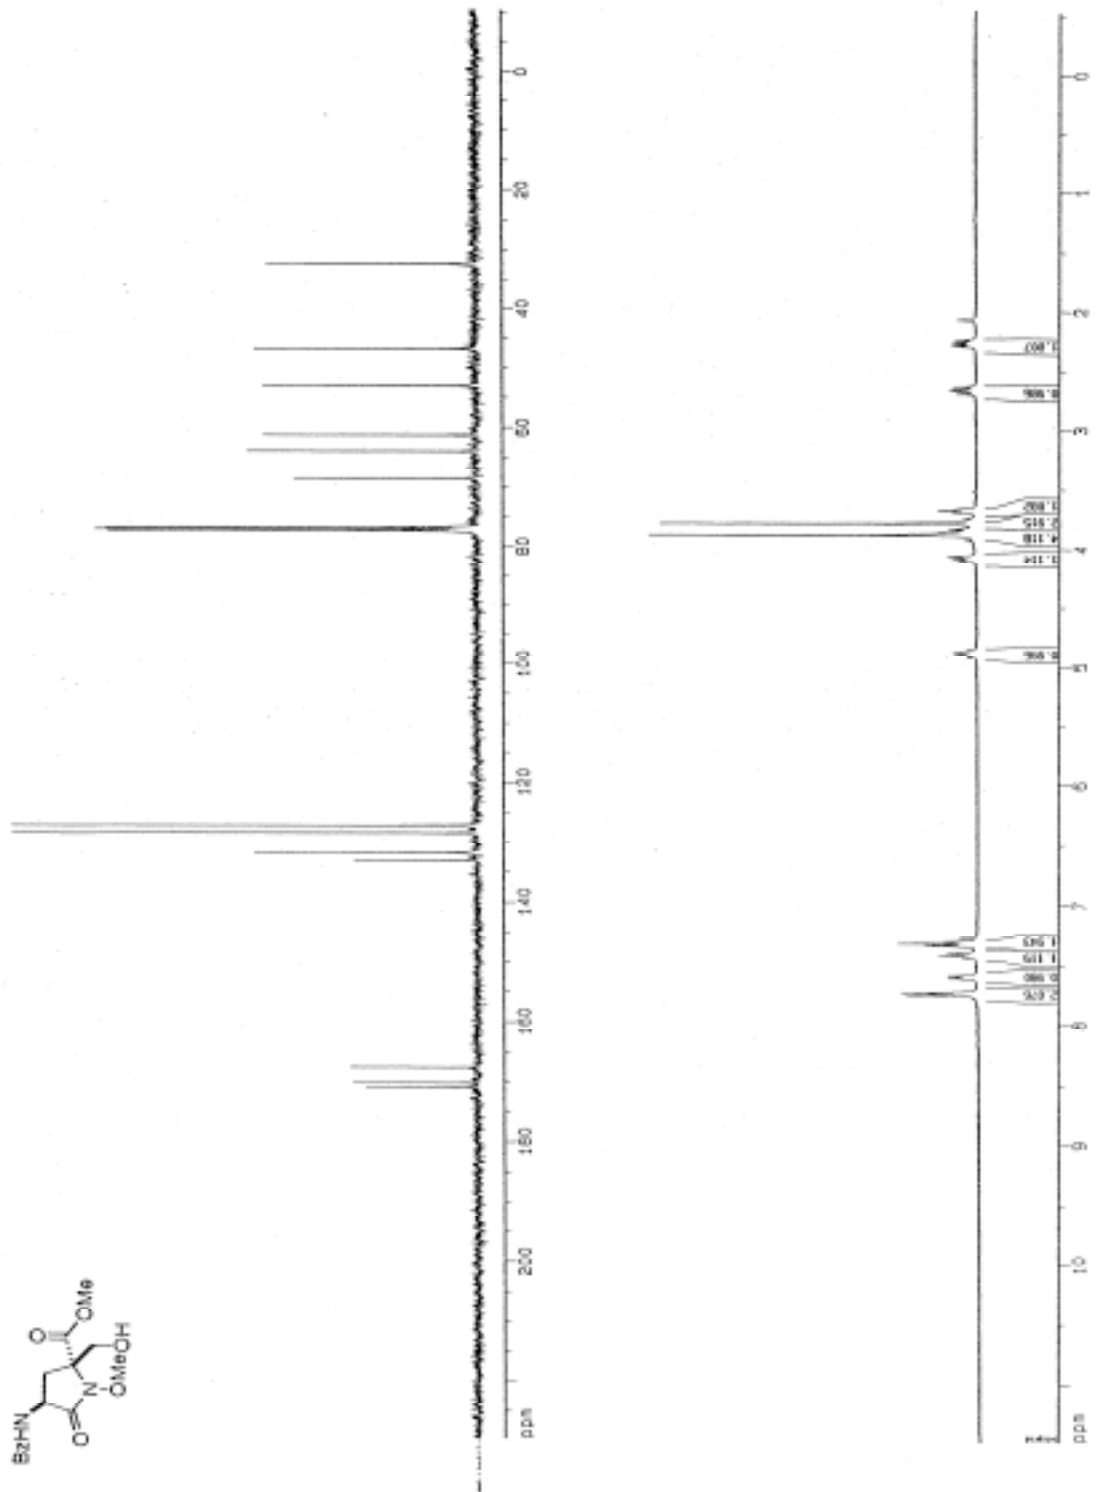

# Compound 30m

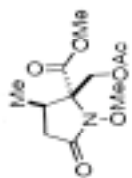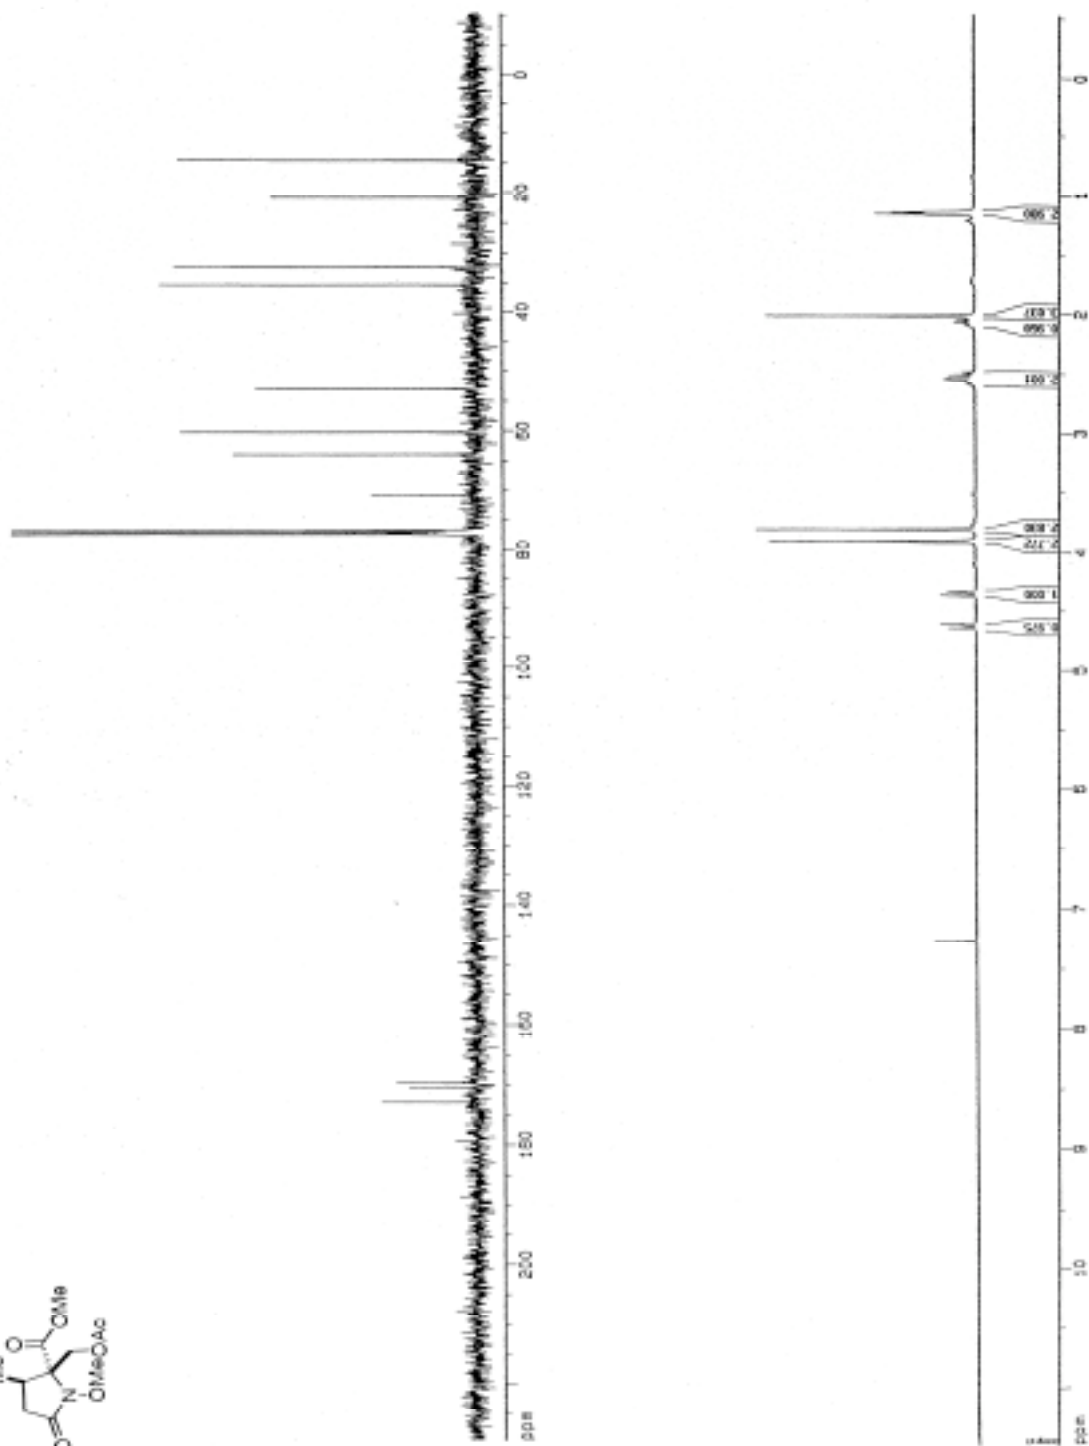



Compound 30n

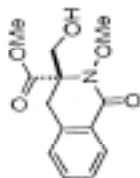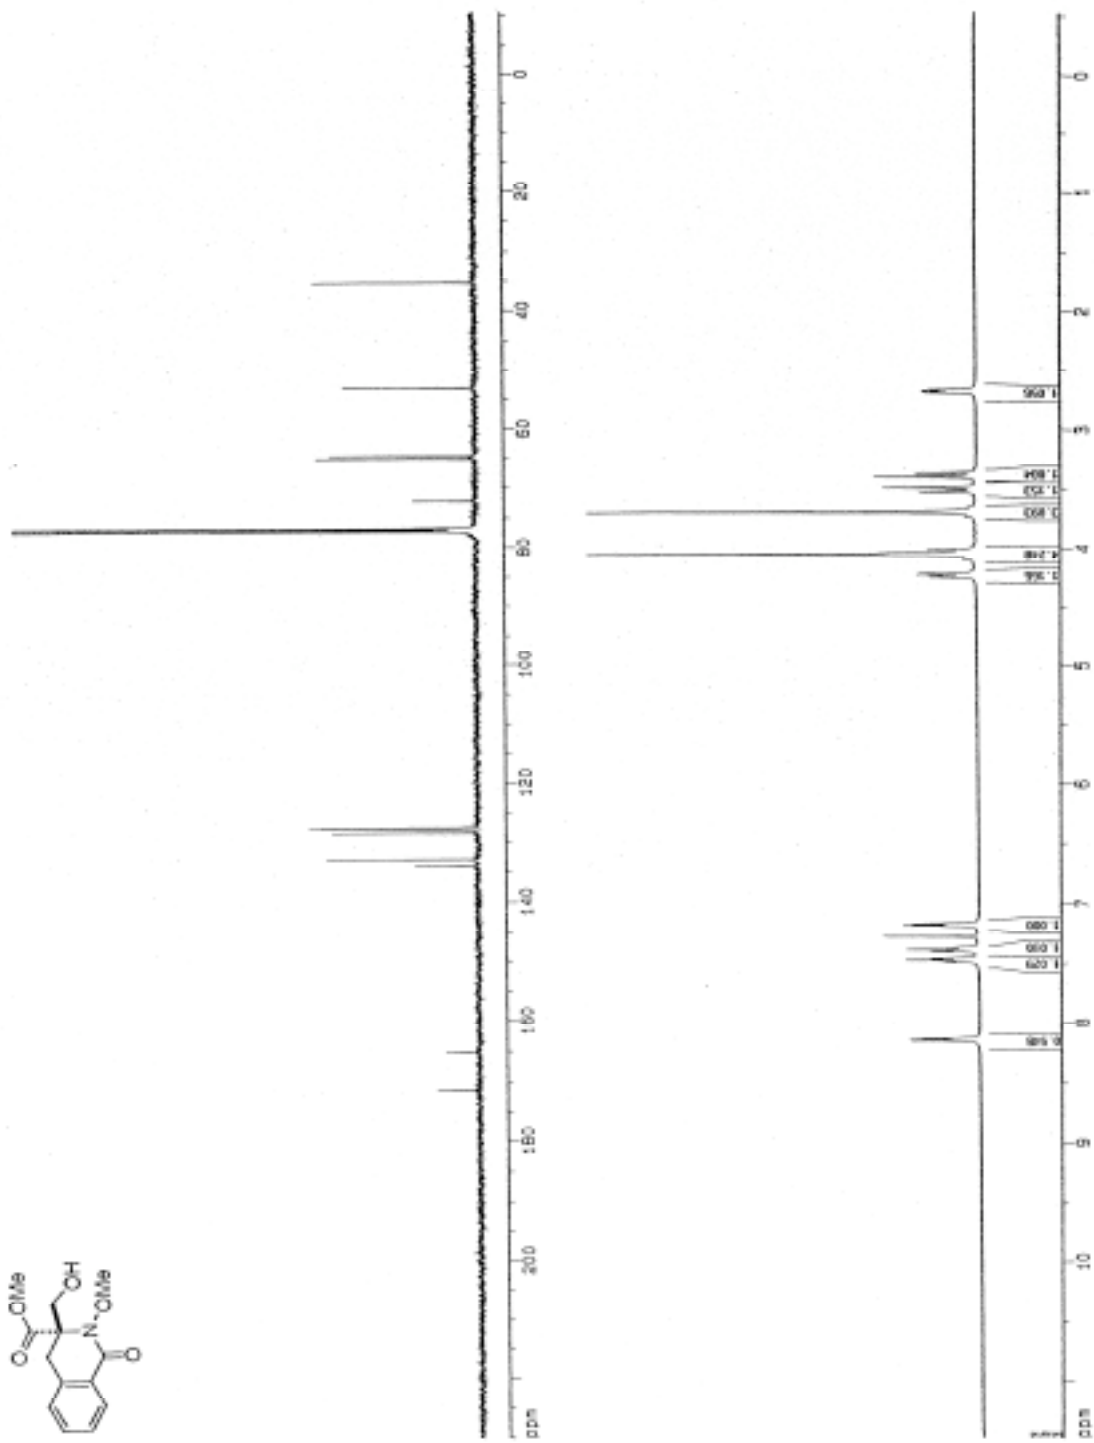

# Compound 32a

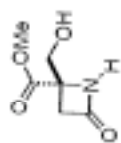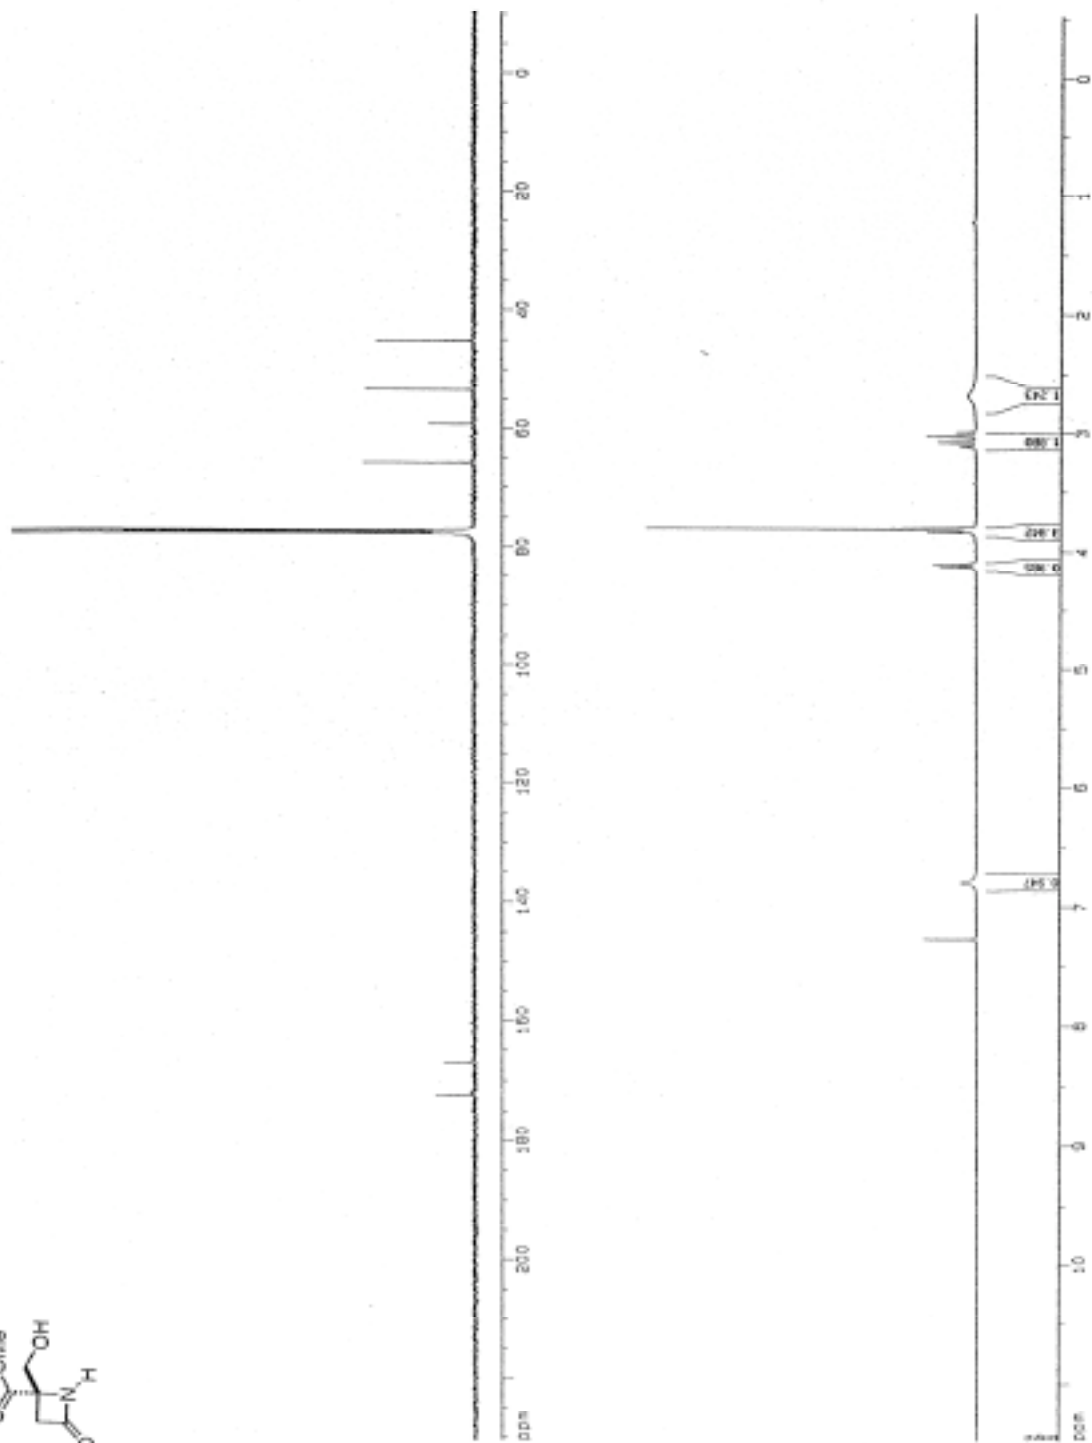

Compound 32c

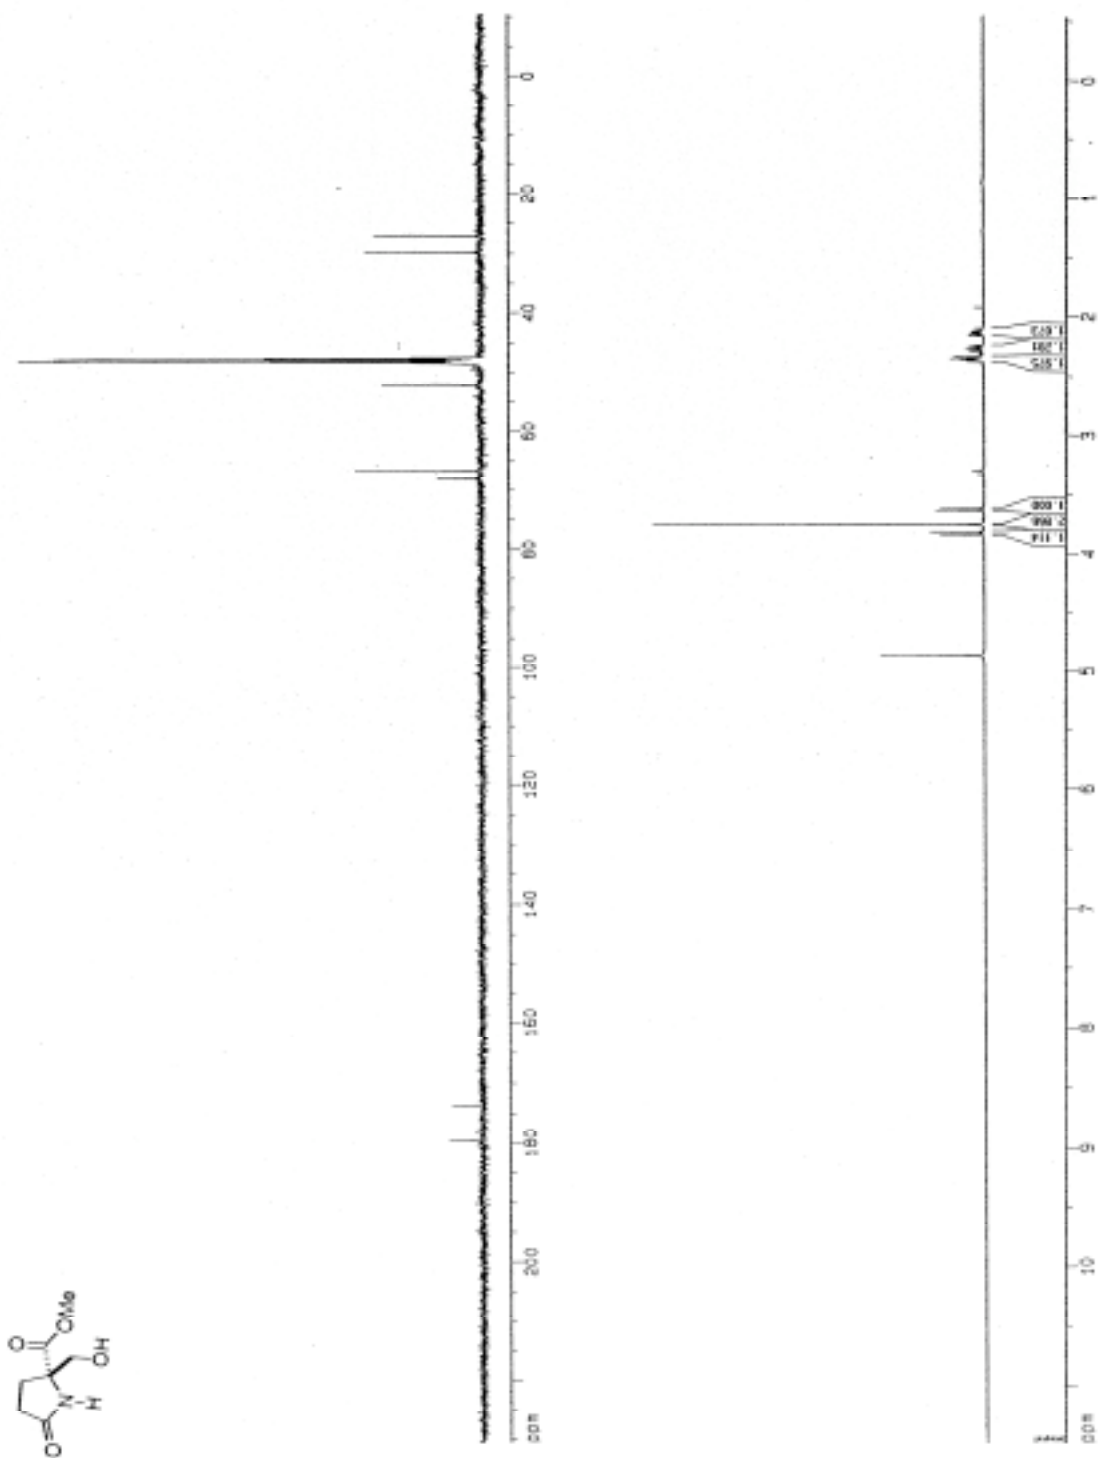

# Compound 32e

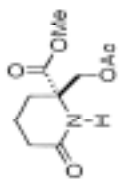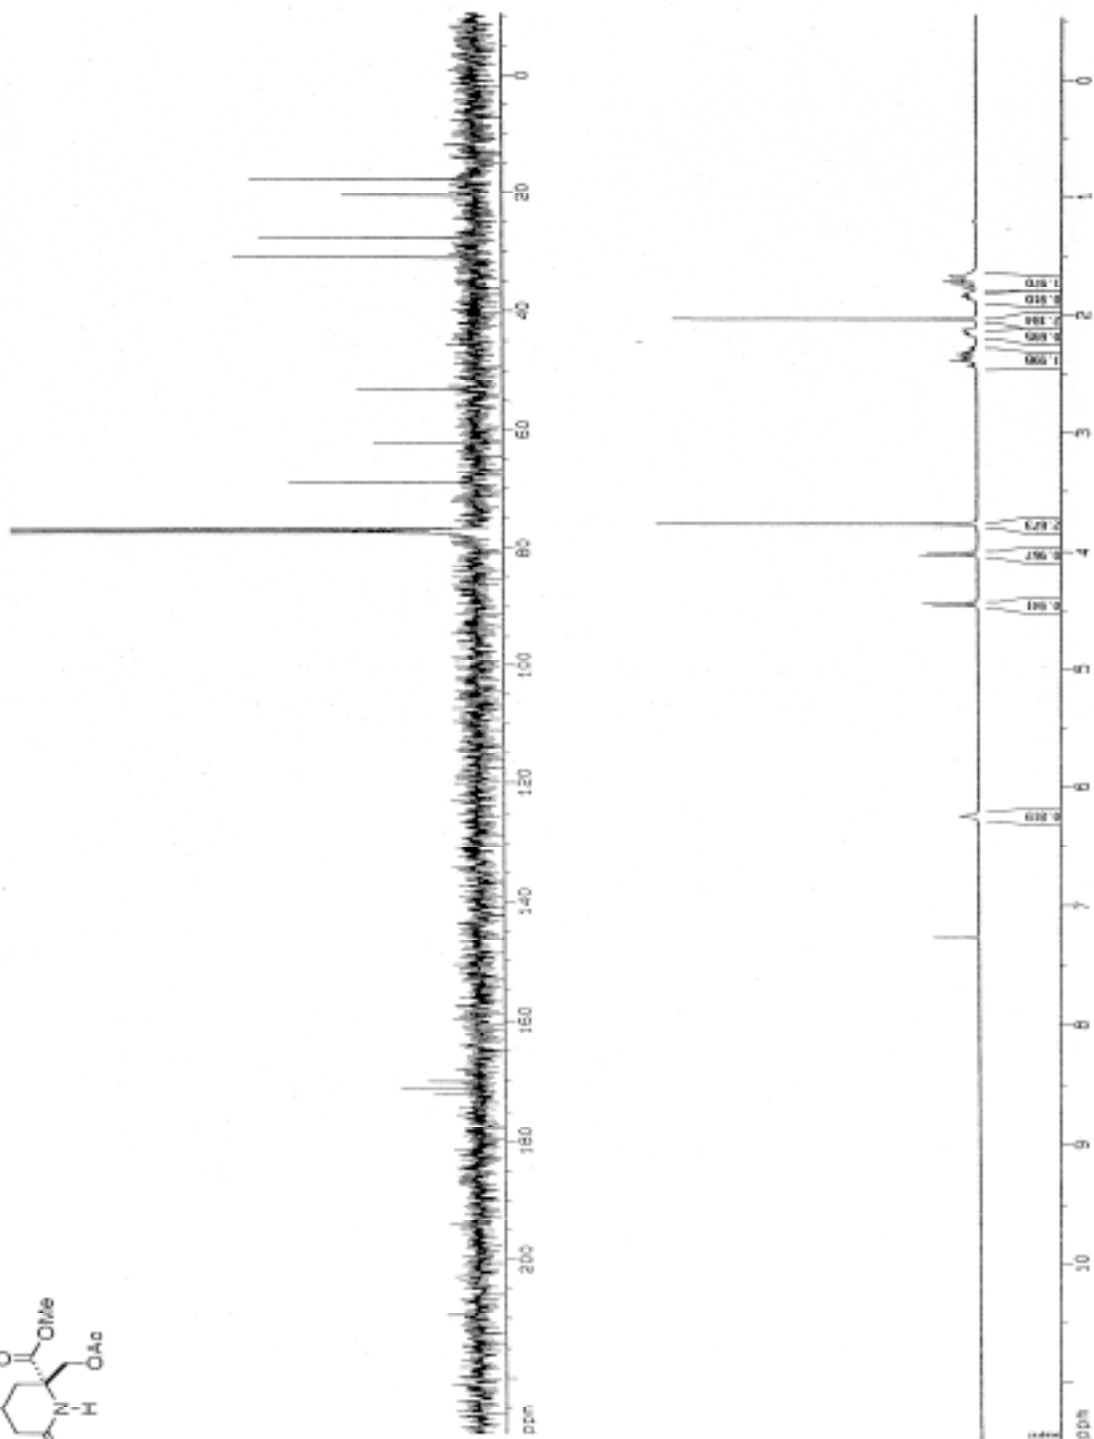

# Compound 32g

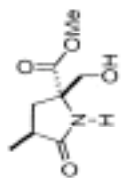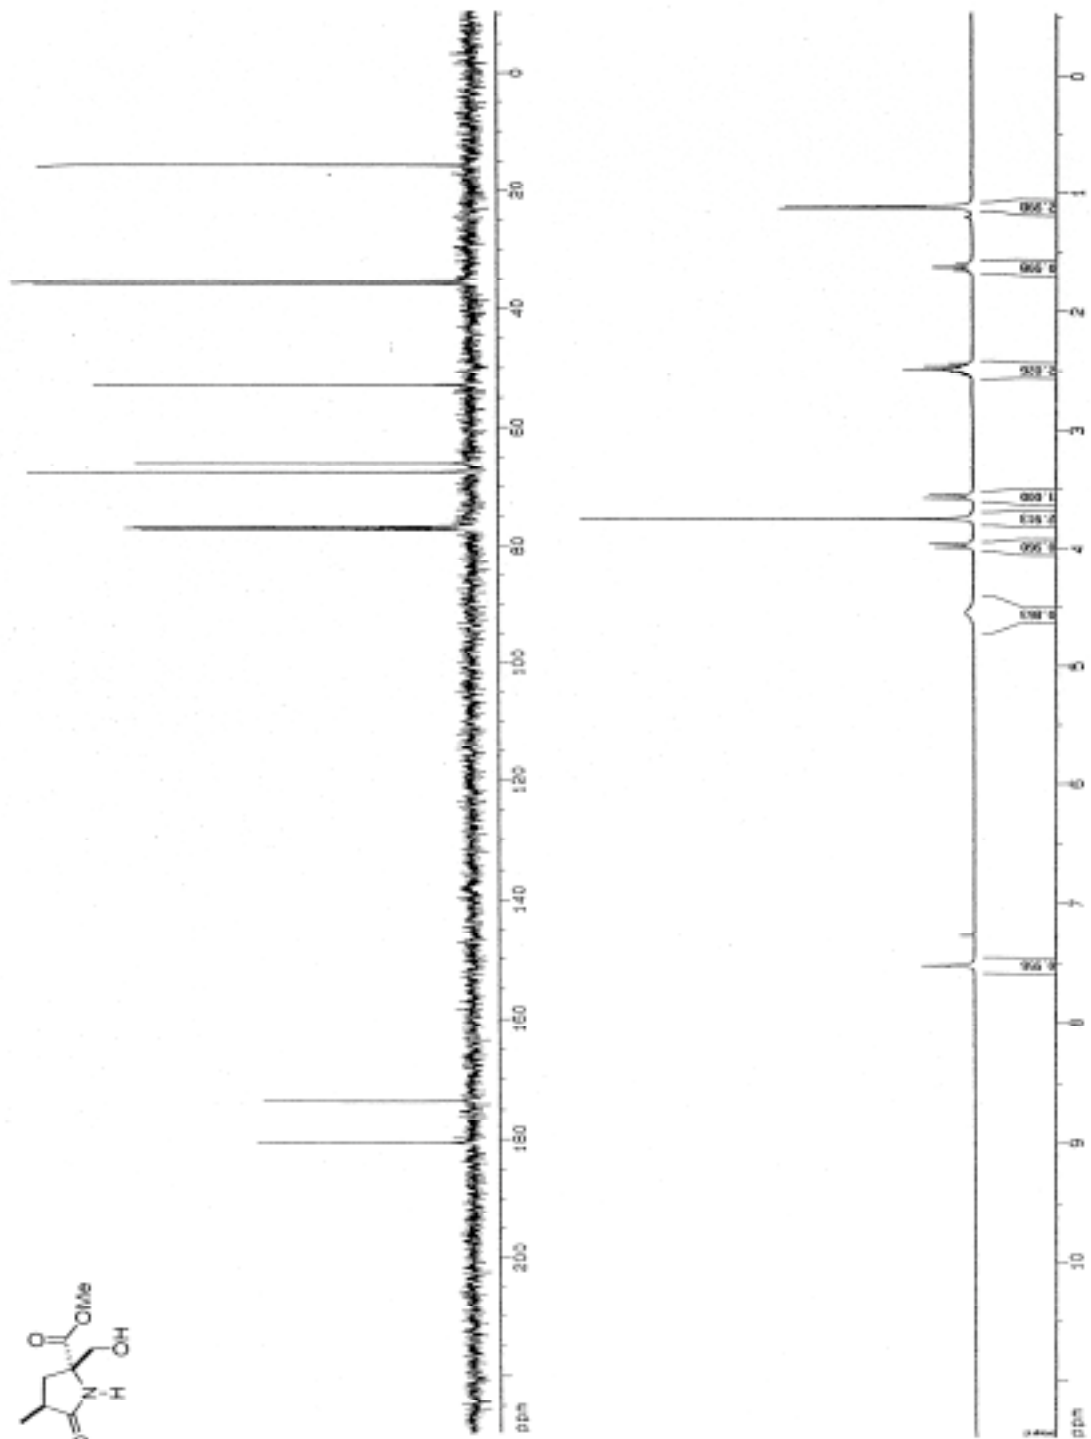

# Compound 32h

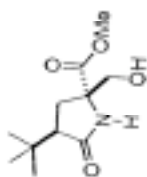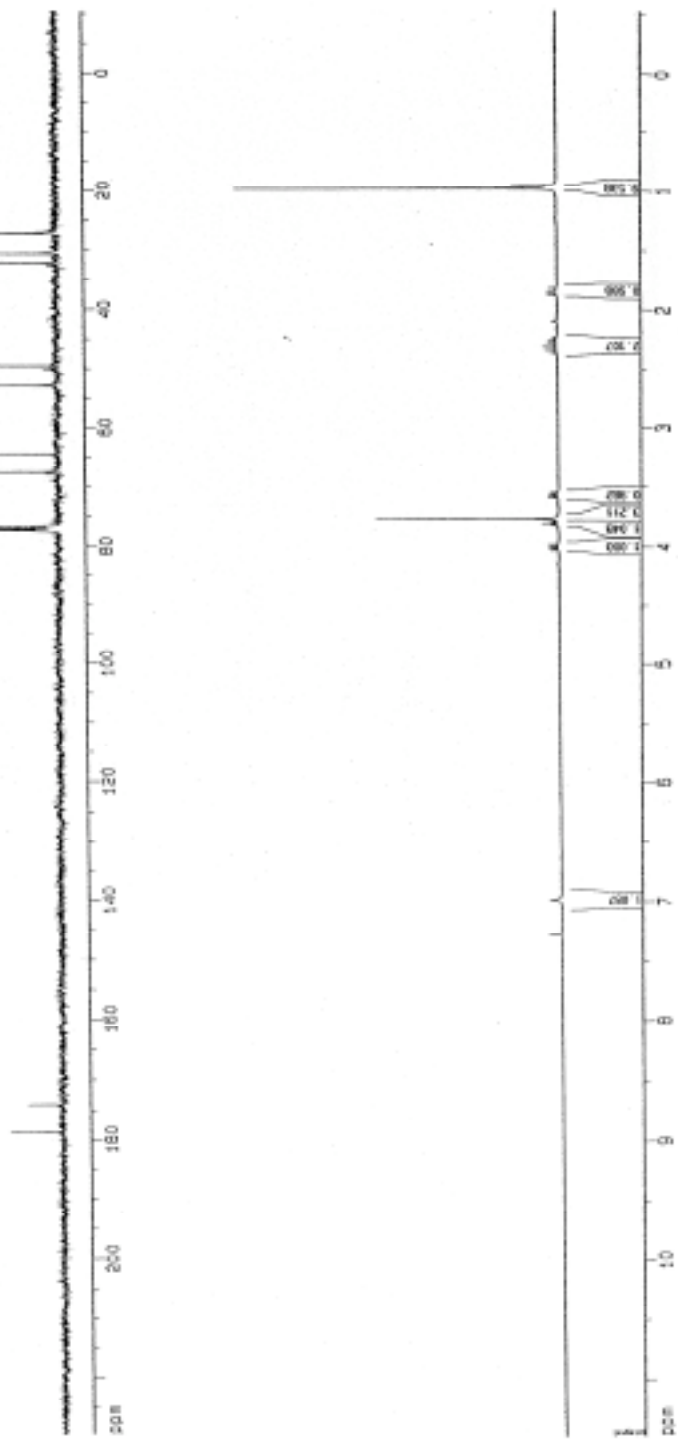

# Compound 32i

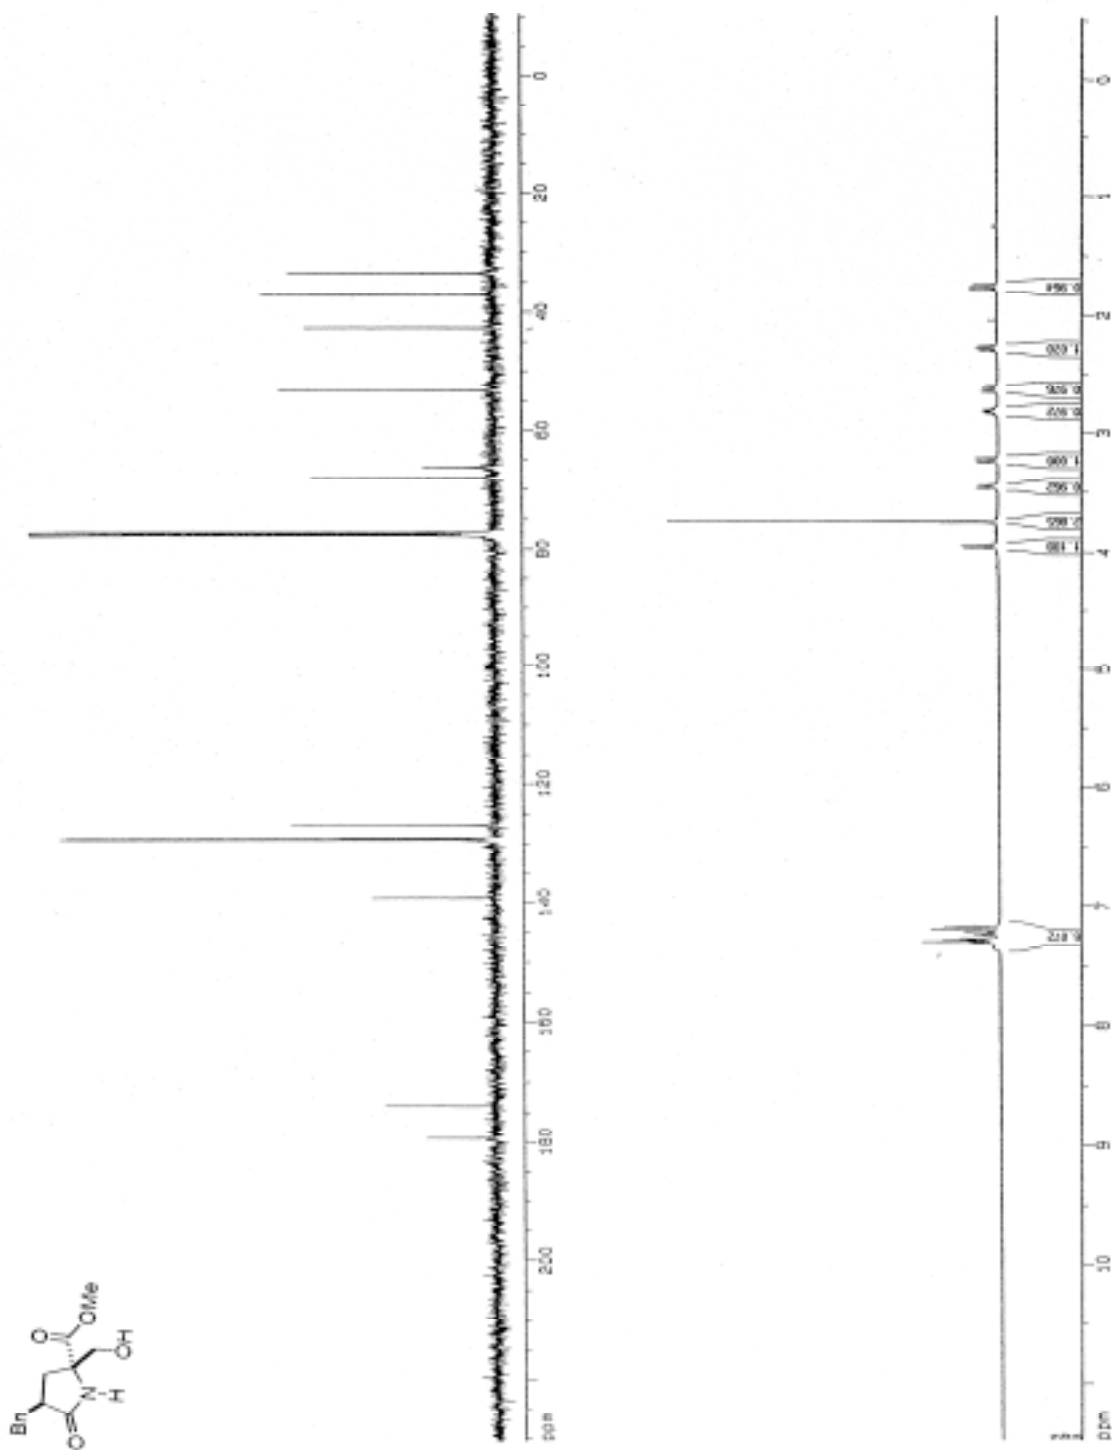

# Compound 32j

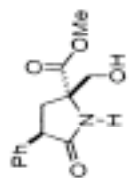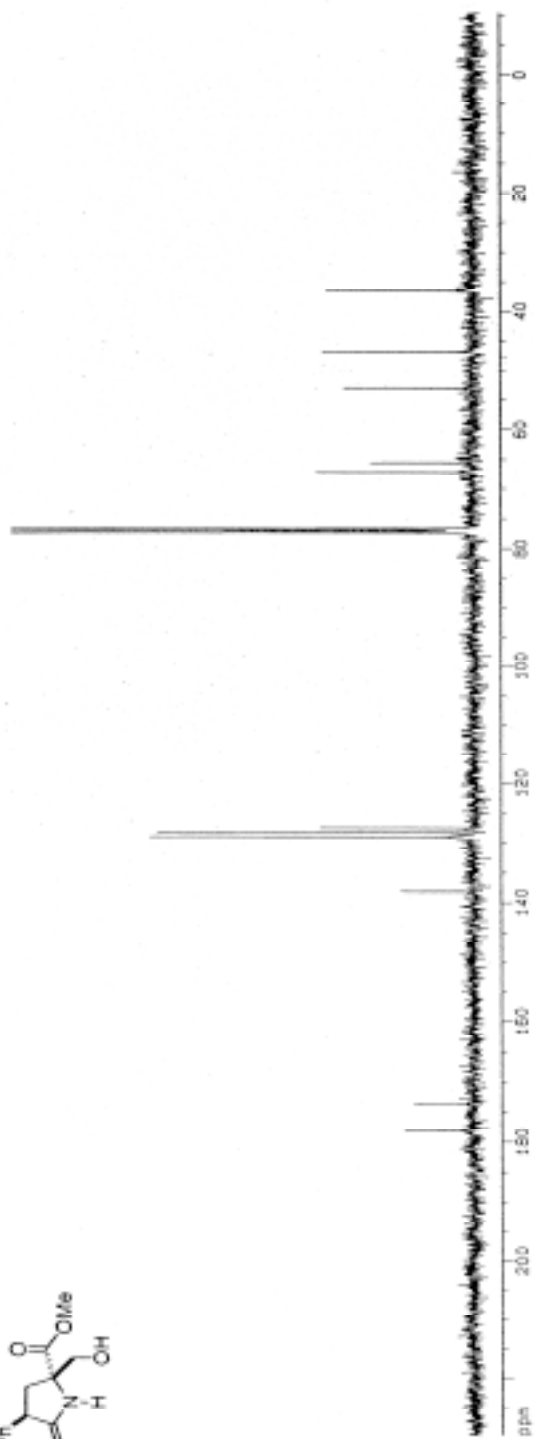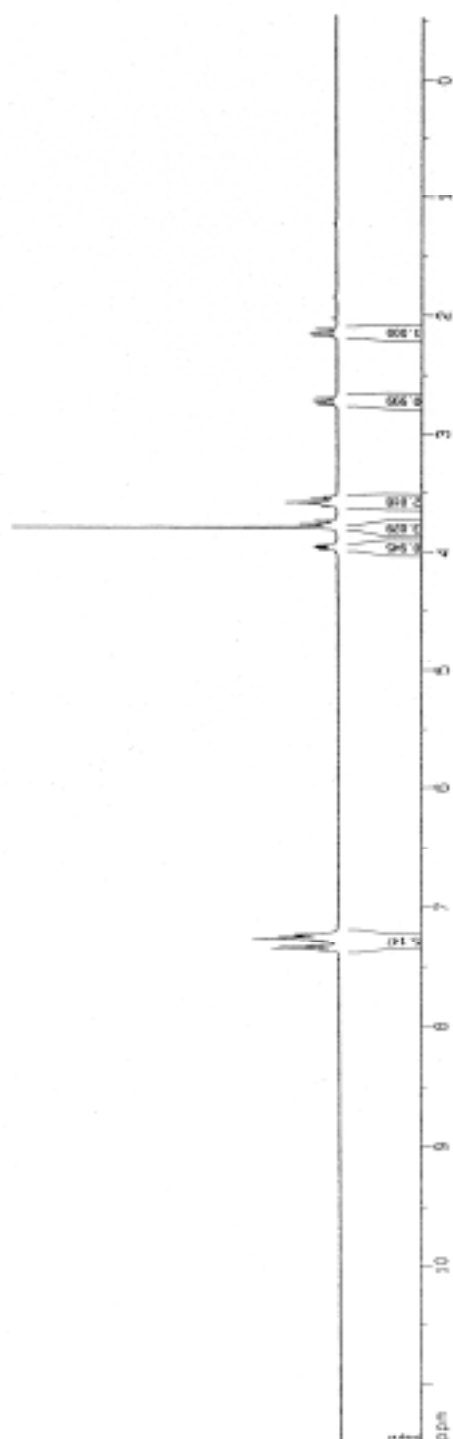



# Compound 32k

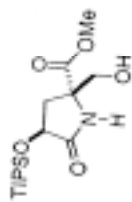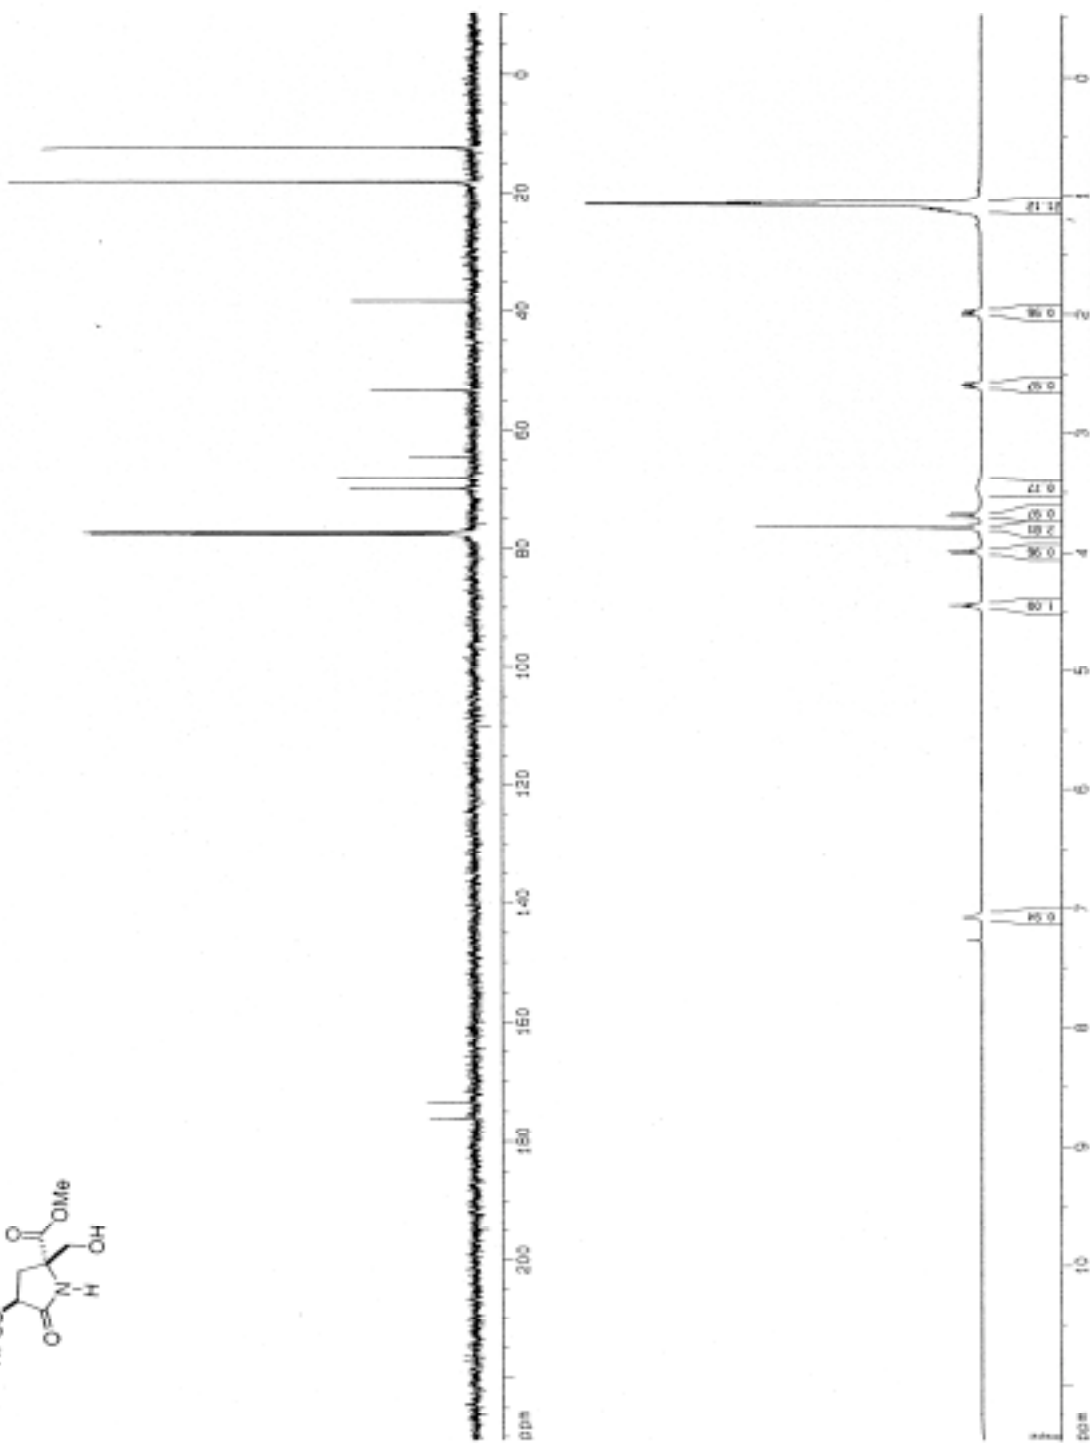



# Compound 32m

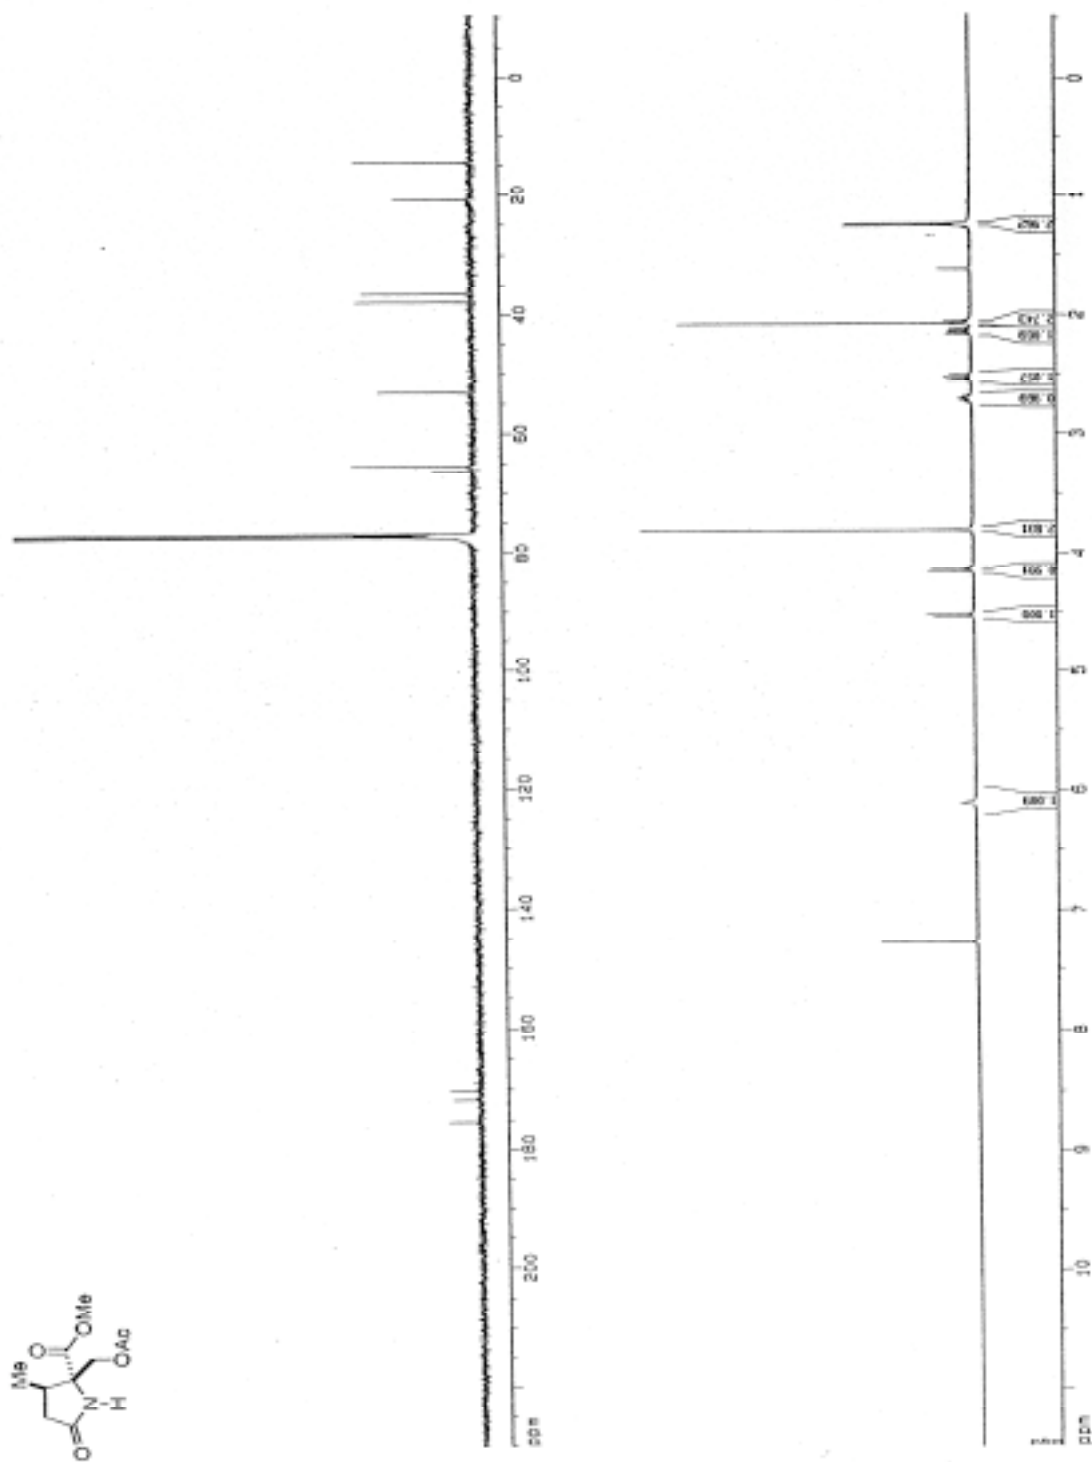

Compound 32n

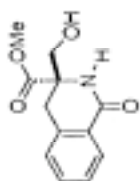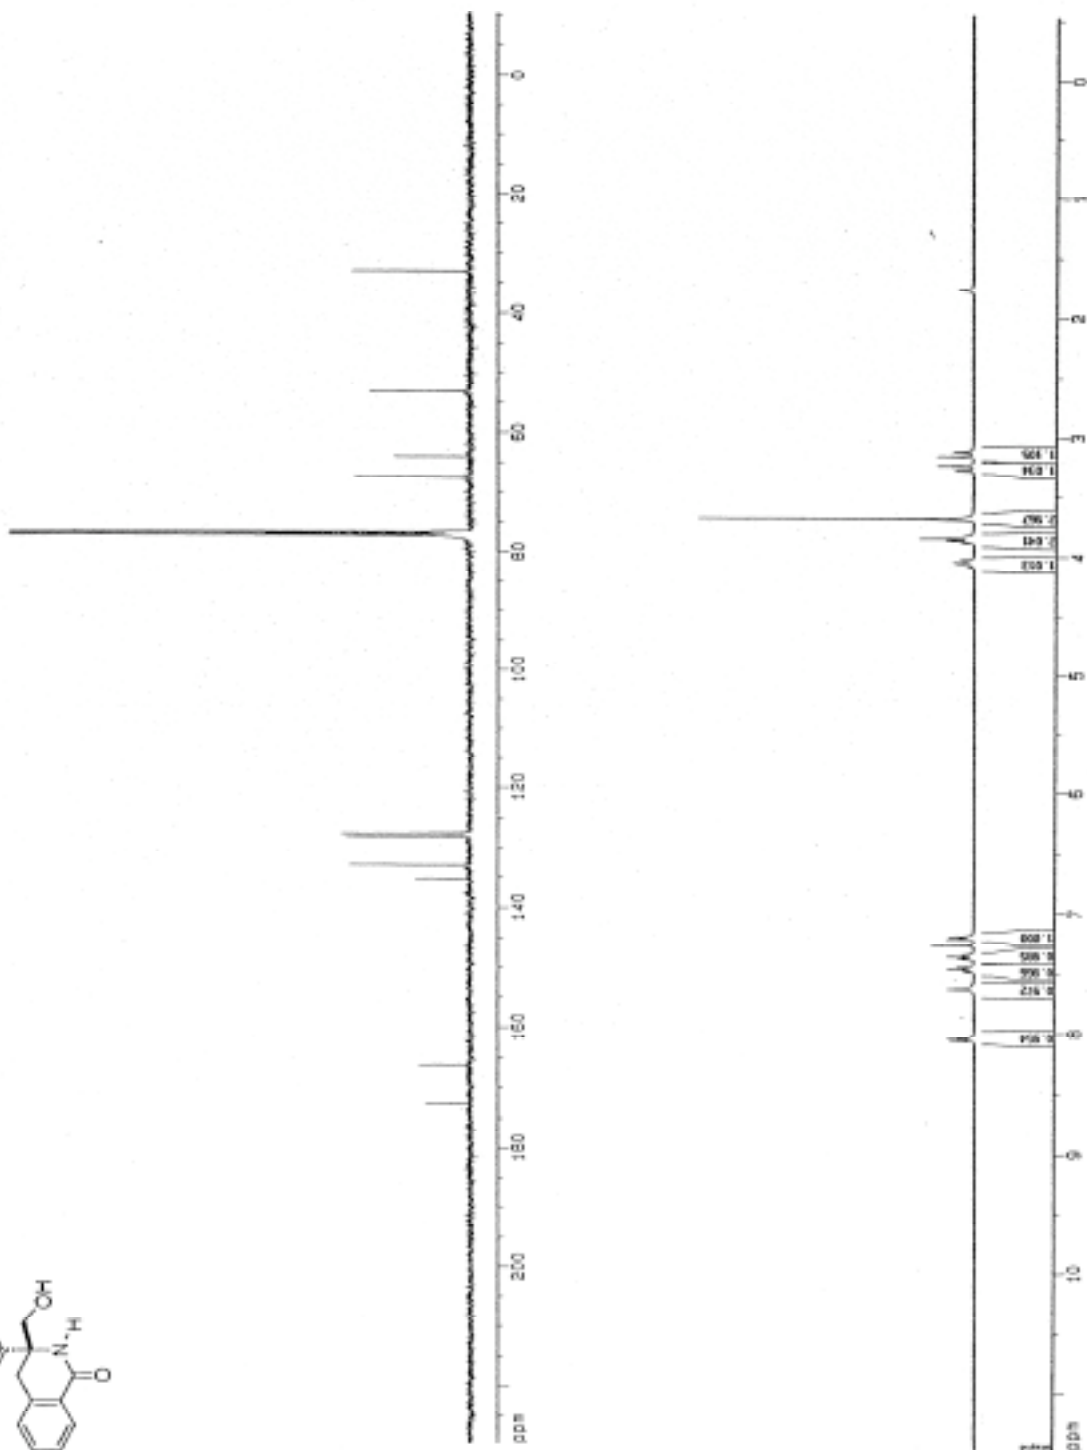

# Compound 33

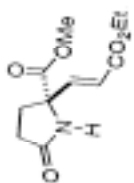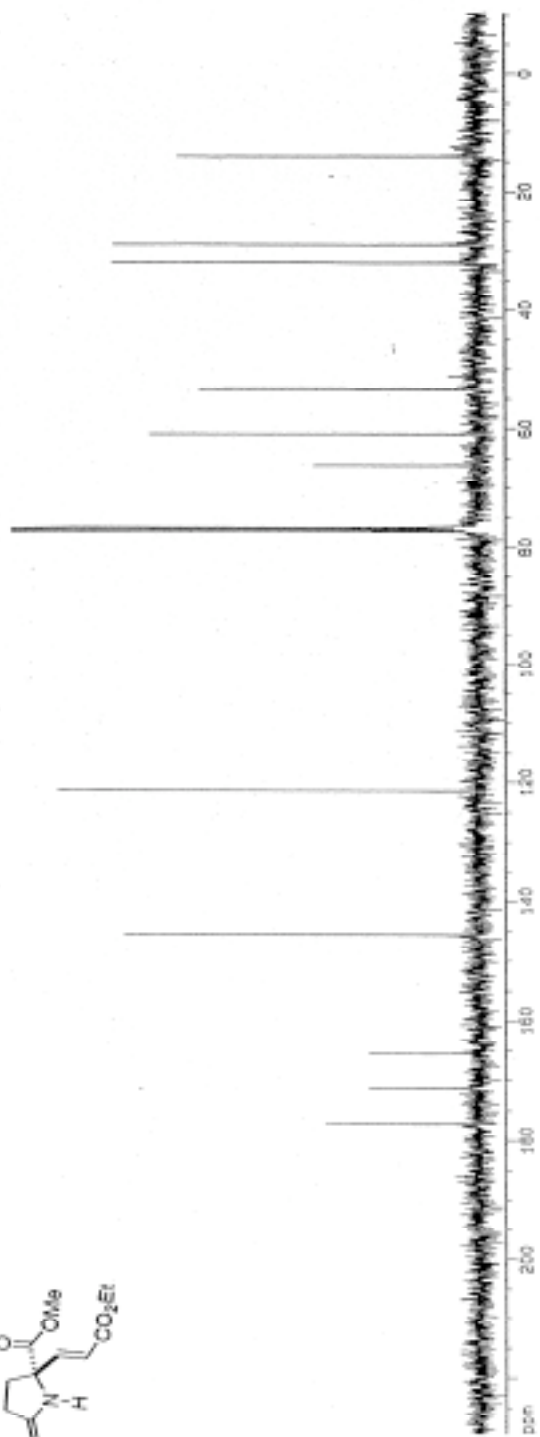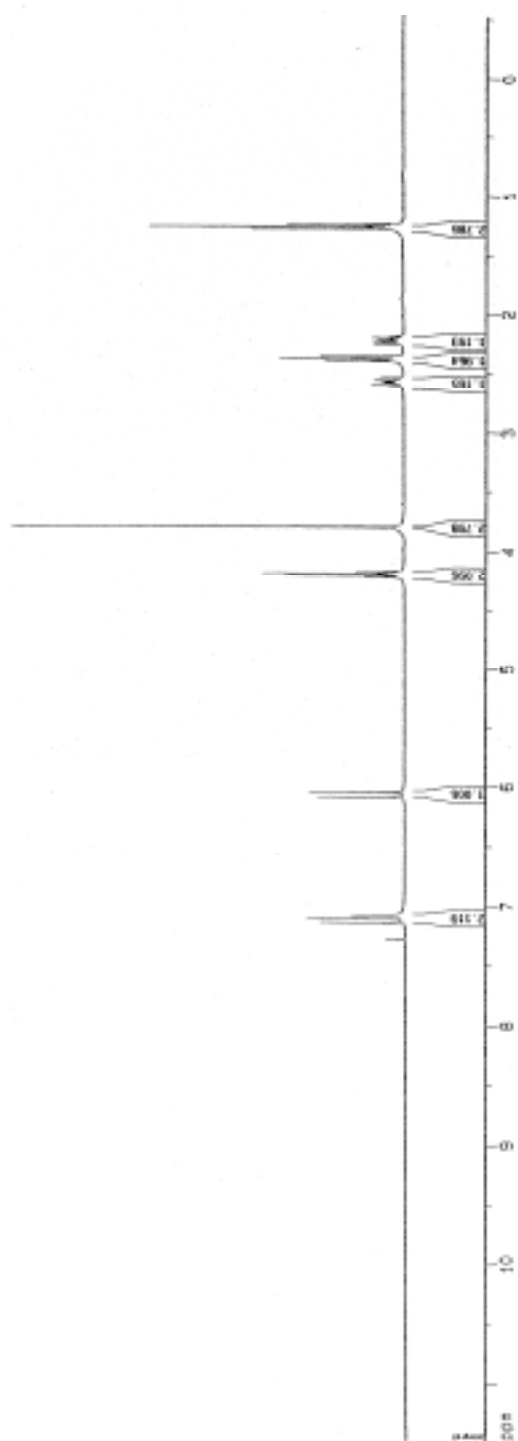

# Compound 34b

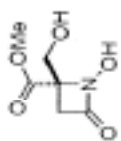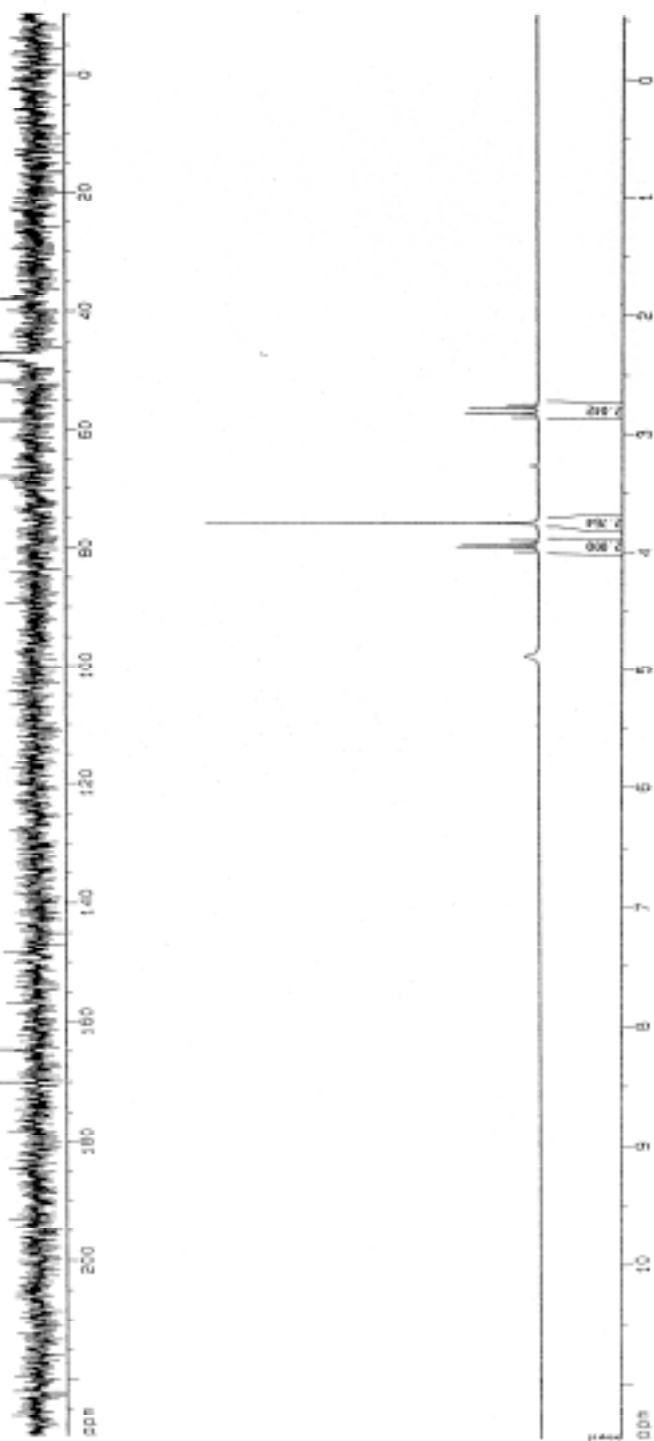

# Compound 34d

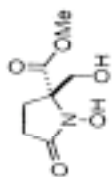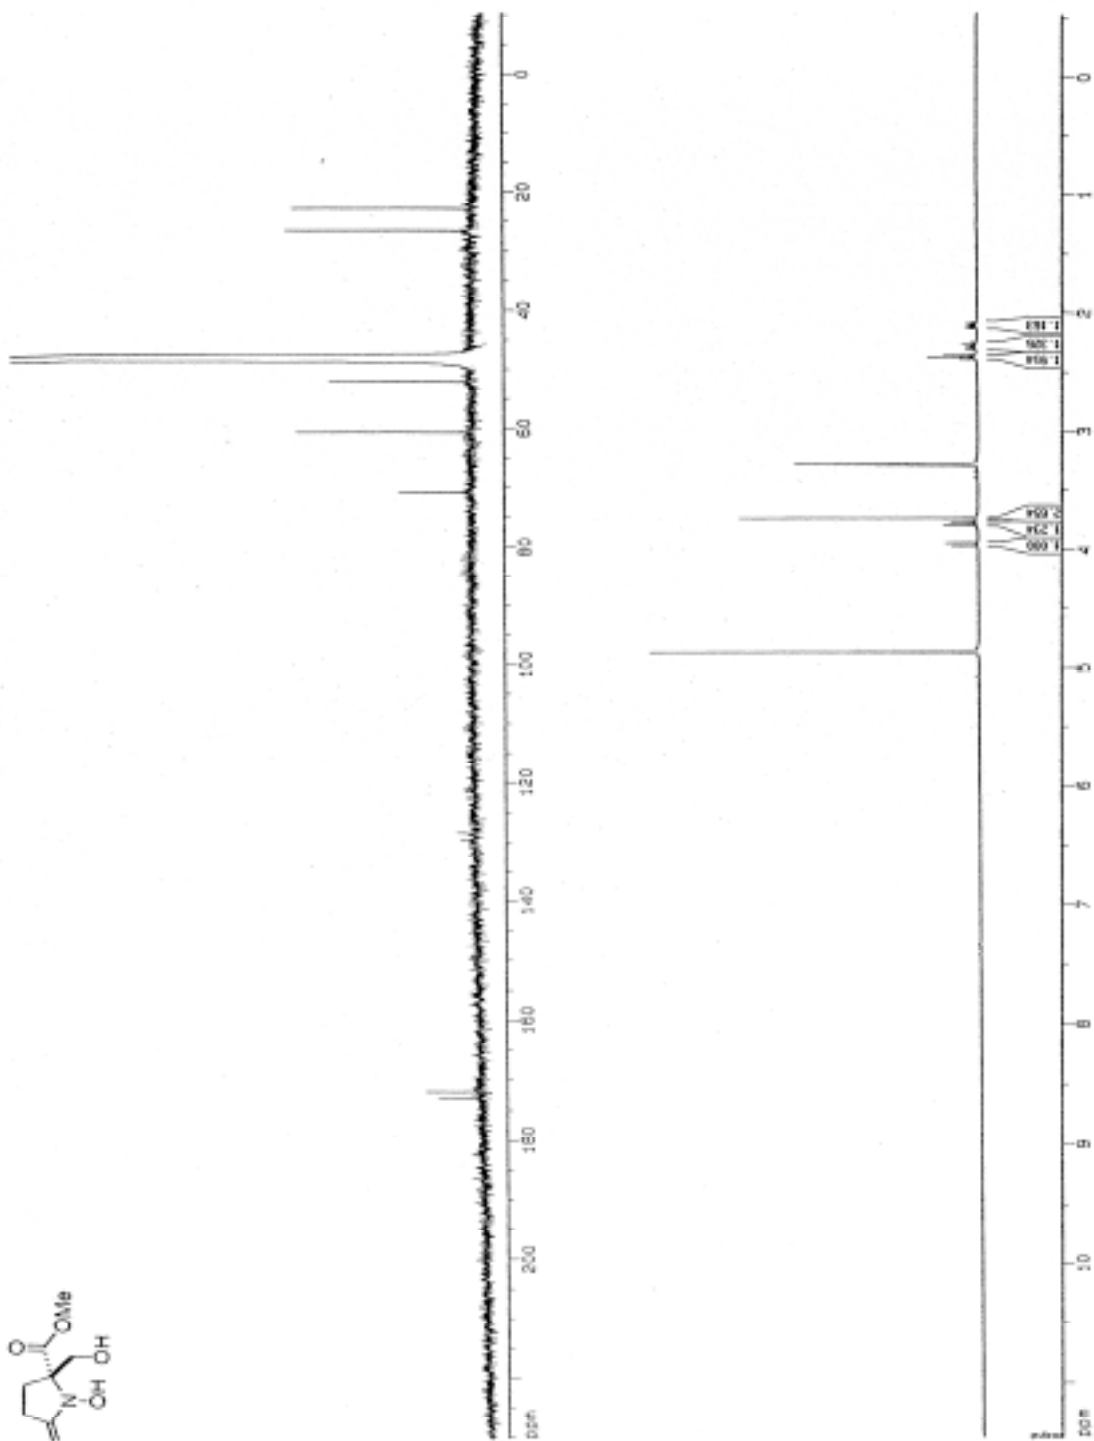

Compound 34f

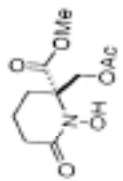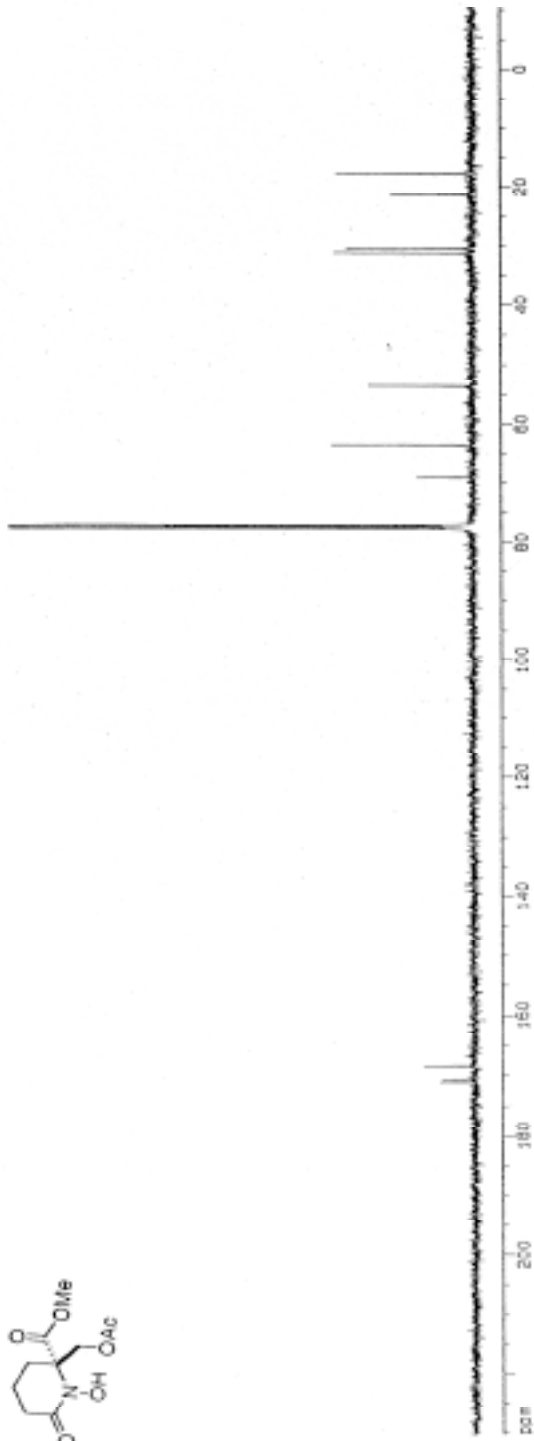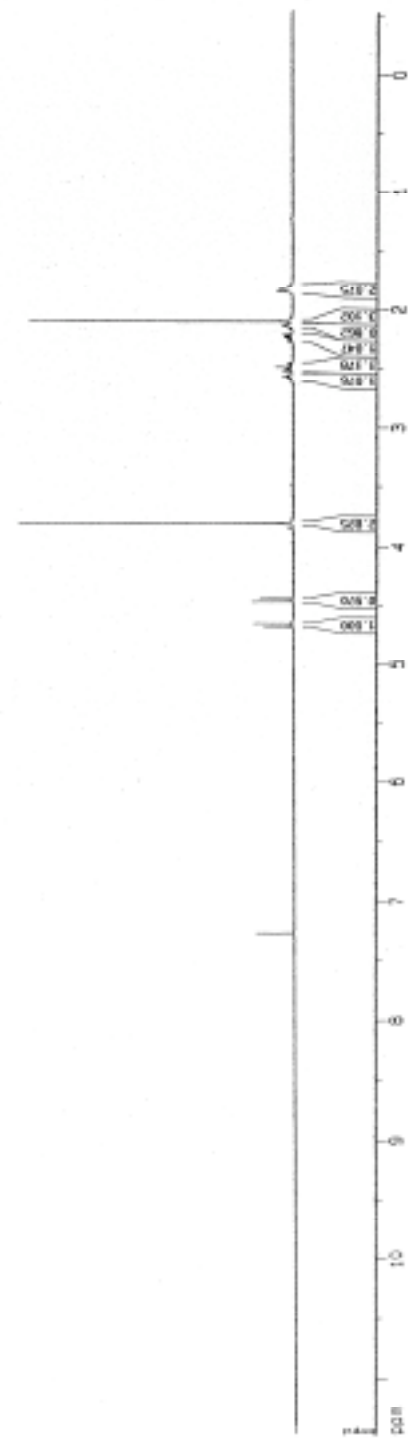



## 12. References

- (1) Still, W. C.; Kahn, M.; Mitra, A. *J. Org. Chem.* **1978**, *43*, 2923.
- (2) G. M. Loudon, A. S. Radhakrishna, M. R. Almond, J. K. Blodgett, R. H. Boutin, *J. Org. Chem.*, **1984**, *49*, 4272.
- (3) (a) Buck, J. S.; Ide, W. S. *Org. Syn., Coll. Vol. II*, 55. (b) Barua, A. K.; Chakrabarty, M.; Datta, P. K.; Ray, S. *Phytochemistry*, **1988**, *27*, 3259.
- (4) Wardrop, D. J.; Burge, M. S. *Chem. Commun.* **2004**, 1230
